# Supplementary material
Source: publisher figshare collection journal article supplement (https://gsajournals.figshare.com/ndownloader/files/30677828)
Supplement: Supplementary file 1 [file 30677828]

## Sheet: Testable Set
Table S3. Identities, enrichment values, and significance testing for Both Nab2 and Atx2-associated transcripts, Only Nab2-associated transcripts, Only Atx2-associated transcripts, and all other transcripts in the RIP-Seq testable set.
	Control-normalized IP/Input			DunAdjp-value		Significance (DunAdjp<0.05)?	SEM for Control-normalized IP/Input			Dunnett Value
Gene Name	Gal4 Control	Nab2-FLAG	Atx2-3xFLAG	Nab2 vs. Control	Atx2 vs. Control	Significantly associated with:	Gal4 Control	Nab2-FLAG	Atx2-3xFLAG	Nab2 vs. Control	Atx2 vs. Control
AGO2	1	1.54951	1.53049	0.0422	0.049	BOTH Nab2 and Atx2	0.0195439	0.198387	0.146522	2.72	2.626
apolpp	1	1.32391	1.20898	0.0002	0.0037	BOTH Nab2 and Atx2	0.0311633	0.042589	0.0276438	6.659	4.296
CG31221	1	1.8658	1.57311	0.002	0.0217	BOTH Nab2 and Atx2	0.140169	0.163952	0.0596185	4.738	3.136
CG40178	1	1.46152	1.38622	0.0095	0.0243	BOTH Nab2 and Atx2	0.0985409	0.0474851	0.108755	3.665	3.067
CG42540	1	1.55013	1.41533	0.0051	0.0237	BOTH Nab2 and Atx2	0.090073	0.104916	0.090088	4.083	3.082
CG4360	1	1.31787	1.61098	0.0482	0.0012	BOTH Nab2 and Atx2	0.114269	0.069992	0.0618779	2.638	5.07
CG6675	1	13.9357	18.0891	0.0117	0.0022	BOTH Nab2 and Atx2	0.59899	1.54518	4.16855	3.532	4.666
CG9813	1	1.21072	1.16142	0.0077	0.0308	BOTH Nab2 and Atx2	0.0367065	0.0543835	0.0170242	3.807	2.916
drk	1	1.71102	1.57288	0.0009	0.0038	BOTH Nab2 and Atx2	0.0641418	0.0155079	0.150027	5.313	4.281
Galphao	1	1.38057	1.38383	0.0485	0.0468	BOTH Nab2 and Atx2	0.0995776	0.0937321	0.112375	2.633	2.656
Gat	1	1.80975	1.62359	0.0029	0.0135	BOTH Nab2 and Atx2	0.0987257	0.0617406	0.189025	4.467	3.44
Ggamma30A	1	1.14227	1.11775	0.0142	0.0359	BOTH Nab2 and Atx2	0.0348393	0.0174401	0.0330792	3.409	2.822
Gp150	1	1.27892	1.2923	0.0016	0.0012	BOTH Nab2 and Atx2	0.0518141	0.0357468	0.0303281	4.889	5.123
HmgZ	1	1.67016	1.6282	0.0371	0.0491	BOTH Nab2 and Atx2	0.167381	0.144081	0.192662	2.801	2.625
me31B	1	2.78598	2.19211	0.0043	0.0372	BOTH Nab2 and Atx2	0.129221	0.477658	0.165297	4.193	2.799
Msp300	1	1.14696	1.15618	0.008	0.0056	BOTH Nab2 and Atx2	0.0236518	0.0333153	0.0243927	3.782	4.02
mtd	1	1.2516	1.2877	0.0362	0.019	BOTH Nab2 and Atx2	0.0637769	0.0780981	0.0425333	2.816	3.22
Rbp6	1	1.25877	1.18876	0.006	0.032	BOTH Nab2 and Atx2	0.0520249	0.0287115	0.0534503	3.965	2.893
RpL37A	1	1.3655	1.27032	0.009	0.041	BOTH Nab2 and Atx2	0.0656515	0.0736647	0.0698221	3.703	2.739
RpS27A	1	1.19587	1.16848	0.0036	0.0089	BOTH Nab2 and Atx2	0.0165227	0.0174391	0.0501757	4.312	3.709
RpS29	1	1.19674	1.12139	0.0035	0.0453	BOTH Nab2 and Atx2	0.0439546	0.0163155	0.0297894	4.338	2.676
shi	1	1.39628	1.3061	0.0144	0.0492	BOTH Nab2 and Atx2	0.0710744	0.0659638	0.104889	3.398	2.624
sm	1	1.32353	1.38148	0.012	0.0046	BOTH Nab2 and Atx2	0.0479838	0.061196	0.0816354	3.514	4.144
snoRNA:Or-aca5	1	2.92181	2.55019	0.0082	0.0254	BOTH Nab2 and Atx2	0.217188	0.384581	0.442219	3.766	3.038
snoRNA:Or-CD2	1	3.52429	3.53284	0.0051	0.005	BOTH Nab2 and Atx2	0.185258	0.664143	0.316217	4.076	4.089
snoRNA:Psi18S-1854b	1	2.02153	2.27487	0.0032	0.0007	BOTH Nab2 and Atx2	0.0573818	0.193862	0.19934	4.407	5.499
stai	1	1.62144	1.6422	0.016	0.0135	BOTH Nab2 and Atx2	0.133736	0.160637	0.0925412	3.33	3.441
Ulp1	1	1.56931	1.66114	0.0351	0.017	BOTH Nab2 and Atx2	0.151111	0.145752	0.128062	2.835	3.293
Ssdp	1	1.53655	1.06135	0.001	0.78	Nab2 Only	0.0524285	0.0183391	0.112645	5.232	0.5982
Arpc2	1	1.8191	0.993633	0.0013	0.9989	Nab2 Only	0.0883655	0.136316	0.116243	5.022	0.03904
CG5890	1	2.72297	1.76003	0.0014	0.0983	Nab2 Only	0.220769	0.328008	0.156729	4.962	2.189
CG8668	1	2.21213	1.59417	0.0015	0.0691	Nab2 Only	0.157804	0.226217	0.122232	4.921	2.412
CG9150	1	3.43836	1.6921	0.002	0.345	Nab2 Only	0.352237	0.485703	0.199507	4.723	1.341
vig	1	1.28564	1.03376	0.0025	0.8157	Nab2 Only	0.0406816	0.0581571	0.0291347	4.56	0.5389
CadN	1	1.48839	1.25847	0.0045	0.0959	Nab2 Only	0.125608	0.0416652	0.0557076	4.166	2.205
retm	1	1.53242	1.30994	0.0046	0.0688	Nab2 Only	0.0617301	0.106716	0.0975257	4.148	2.415
futsch	1	1.21088	1.03549	0.0048	0.7197	Nab2 Only	0.00555058	0.0485406	0.0391451	4.126	0.6943
side-II	1	2.69507	1.76034	0.0053	0.174	Nab2 Only	0.124668	0.352547	0.349625	4.055	1.819
CG17514	1	1.38995	1.22399	0.0056	0.0814	Nab2 Only	0.0462184	0.101592	0.0407539	4.019	2.309
dpr7	1	2.57795	1.33605	0.0059	0.6209	Nab2 Only	0.0782893	0.470646	0.0868435	3.985	0.8487
Amph	1	1.4561	1.24566	0.0064	0.1107	Nab2 Only	0.0512958	0.119519	0.0579771	3.923	2.113
Su(var)2-10	1	1.62208	1.17359	0.0071	0.4822	Nab2 Only	0.0942794	0.132344	0.112227	3.858	1.077
Nop17l	1	1.58406	1.10477	0.0086	0.7352	Nab2 Only	0.130118	0.122106	0.0696434	3.734	0.6699
snoRNA:Dek-a	1	2.90908	2.03847	0.0091	0.1301	Nab2 Only	0.251904	0.447684	0.369851	3.694	2.009
sd	1	1.52431	1.23135	0.0092	0.2308	Nab2 Only	0.128643	0.0926806	0.0717365	3.69	1.628
Bsg	1	1.27203	1.14766	0.0095	0.1339	Nab2 Only	0.0170059	0.063836	0.0623675	3.667	1.991
CG16791	1	1.39392	1.21079	0.0102	0.1452	Nab2 Only	0.0486821	0.0777007	0.0966209	3.622	1.938
Ephrin	1	1.52686	1.35064	0.0109	0.0727	Nab2 Only	0.0767603	0.131326	0.0970742	3.576	2.38
luna	1	2.00594	1.46763	0.011	0.2203	Nab2 Only	0.235854	0.164025	0.190958	3.572	1.66
CG32112	1	3.71431	2.108	0.011	0.2944	Nab2 Only	0.281812	0.31527	0.829765	3.57	1.457
Cpsf160	1	2.58796	1.46765	0.0114	0.5005	Nab2 Only	0.14914	0.384523	0.361132	3.548	1.045
snoRNA:Psi18S-1377d	1	2.20618	1.68669	0.012	0.1318	Nab2 Only	0.175307	0.357883	0.133563	3.515	2.001
chm	1	2.07516	0.875043	0.0125	0.8891	Nab2 Only	0.304037	0.137635	0.176303	3.489	0.4055
Clamp	1	2.28252	1.74164	0.0127	0.13	Nab2 Only	0.151381	0.297838	0.304302	3.476	2.01
PMCA	1	1.57077	1.33685	0.0128	0.1223	Nab2 Only	0.12941	0.116897	0.100598	3.472	2.049
CG42613	1	1.47584	1.31835	0.0131	0.0808	Nab2 Only	0.110808	0.0857553	0.093687	3.458	2.313
43709	1	1.77973	1.09799	0.0133	0.8748	Nab2 Only	0.167818	0.0912796	0.200571	3.448	0.4333
msps	1	1.25018	1.18156	0.0139	0.0616	Nab2 Only	0.0539603	0.0439594	0.0563227	3.422	2.484
mol	1	3.12188	2.11167	0.0147	0.1865	Nab2 Only	0.360224	0.655132	0.175323	3.384	1.773
Edc3	1	1.44429	1.04747	0.0147	0.9103	Nab2 Only	0.0769079	0.131528	0.0514592	3.384	0.3615
Oatp30B	1	1.28836	1.07451	0.0152	0.6083	Nab2 Only	0.0522732	0.0414709	0.0811517	3.361	0.8686
igl	1	1.77042	1.45631	0.0154	0.135	Nab2 Only	0.224054	0.133145	0.106191	3.353	1.986
CG7927	1	1.6451	1.30921	0.0157	0.2394	Nab2 Only	0.111583	0.170813	0.119151	3.344	1.603
Set1	1	1.98117	1.37334	0.0163	0.3823	Nab2 Only	0.107124	0.32326	0.123194	3.318	1.263
CG11147	1	1.27611	1.00751	0.0163	0.994	Nab2 Only	0.0611415	0.0599326	0.0552544	3.319	0.09029
Acsl	1	1.26317	1.13384	0.0184	0.2241	Nab2 Only	0.0387064	0.0762231	0.0507542	3.242	1.649
CG42258	1	1.57862	1.38537	0.0187	0.1043	Nab2 Only	0.0846812	0.14829	0.13771	3.23	2.151
Adar	1	1.66873	1.26251	0.0193	0.3832	Nab2 Only	0.147406	0.191701	0.0808189	3.212	1.261
CG12730	1	1.86875	1.53672	0.0196	0.1367	Nab2 Only	0.139852	0.282666	0.105017	3.201	1.978
4E-T	1	1.53995	1.14467	0.0201	0.6179	Nab2 Only	0.129485	0.0433248	0.156392	3.185	0.8534
CkIalpha	1	1.35745	1.2139	0.0202	0.1527	Nab2 Only	0.0839841	0.101182	0.0402326	3.184	1.905
CG18815	1	1.4092	1.01697	0.0206	0.9874	Nab2 Only	0.0522554	0.138477	0.0557057	3.169	0.1314
CG17209	1	3.64279	1.23794	0.0224	0.9445	Nab2 Only	0.217296	1.00391	0.152475	3.117	0.2806
Syt7	1	1.99976	1.08198	0.0233	0.9543	Nab2 Only	0.0866174	0.356261	0.149048	3.094	0.2537
Cyt-c-p	1	1.29386	1.13016	0.0236	0.3333	Nab2 Only	0.0320692	0.101542	0.0476789	3.085	1.366
CG2233	1	1.13584	1.06697	0.0238	0.2704	Nab2 Only	0.0226363	0.0423591	0.0248002	3.078	1.517
l(1)G0289	1	1.13035	1.00896	0.0244	0.9682	Nab2 Only	0.0219983	0.0345236	0.0322352	3.064	0.2106
f-cup	1	1.42098	1.26713	0.0255	0.1479	Nab2 Only	0.0678343	0.0763564	0.135711	3.036	1.926
Treh	1	1.16758	1.02229	0.0255	0.89	Nab2 Only	0.0470836	0.0289651	0.0389846	3.034	0.4036
RpL15	1	1.36694	1.16498	0.0256	0.3344	Nab2 Only	0.069239	0.115779	0.0612033	3.034	1.364
mahe	1	1.37231	1.1922	0.026	0.2544	Nab2 Only	0.0626399	0.0830371	0.109262	3.023	1.56
Rab5	1	1.22119	1.16923	0.0262	0.0812	Nab2 Only	0.06732	0.050947	0.0303842	3.019	2.31
Rab7	1	1.39895	1.17436	0.0263	0.3556	Nab2 Only	0.104487	0.114586	0.0469914	3.015	1.318
Aac11	1	1.76515	1.33202	0.0264	0.3604	Nab2 Only	0.167562	0.248899	0.0816121	3.014	1.308
chb	1	1.32284	0.95146	0.0264	0.8642	Nab2 Only	0.0743383	0.0803162	0.0722858	3.015	0.4533
Start1	1	2.40788	1.16063	0.027	0.919	Nab2 Only	0.239366	0.466977	0.234114	3.001	0.3424
SLC22A	1	2.19447	1.59602	0.0272	0.2795	Nab2 Only	0.334135	0.179411	0.307904	2.995	1.494
Tusp	1	1.52563	1.18582	0.028	0.4962	Nab2 Only	0.190158	0.0197536	0.101178	2.976	1.052
CYLD	1	1.83854	1.09821	0.028	0.9161	Nab2 Only	0.224843	0.149008	0.214912	2.978	0.3488
BuGZ	1	1.4428	1.21329	0.0281	0.3044	Nab2 Only	0.0412697	0.104261	0.143715	2.975	1.433
nAChRalpha4	1	1.46934	1.28395	0.0289	0.1821	Nab2 Only	0.0751886	0.139015	0.113189	2.957	1.789
Kap-alpha3	1	1.32037	1.17865	0.0292	0.2253	Nab2 Only	0.0949873	0.0441338	0.0819796	2.95	1.645
CG8475	1	1.41254	1.16689	0.0294	0.4186	Nab2 Only	0.039135	0.153581	0.0655652	2.946	1.192
CG15111	1	1.31017	1.04439	0.0295	0.881	Nab2 Only	0.0977358	0.0586304	0.0605084	2.944	0.4213
Mkk4	1	1.55481	1.36519	0.0297	0.1458	Nab2 Only	0.135387	0.126362	0.13823	2.94	1.935
Efa6	1	1.17566	1.05016	0.0297	0.6267	Nab2 Only	0.0497874	0.0325733	0.042603	2.94	0.8396
scyl	1	1.39674	1.28751	0.0299	0.1083	Nab2 Only	0.113929	0.060122	0.103939	2.936	2.127
ste24a	1	2.09582	1.51989	0.0304	0.3239	Nab2 Only	0.274434	0.267101	0.252781	2.925	1.388
Uch-L5	1	7.07628	2.35791	0.0312	0.7479	Nab2 Only	0.429026	2.47113	0.504967	2.909	0.65
pros	1	1.27797	1.09896	0.0321	0.5096	Nab2 Only	0.0843135	0.0411677	0.0711696	2.891	1.029
snoRNA:Psi18S-110	1	2.68487	2.09441	0.0324	0.1599	Nab2 Only	0.129383	0.620702	0.330331	2.886	1.875
Oatp33Ea	1	2.73312	1.51605	0.0327	0.6153	Nab2 Only	0.374711	0.605476	0.190712	2.88	0.8574
CG4080	1	2.05524	1.73432	0.0334	0.133	Nab2 Only	0.320509	0.246761	0.198886	2.867	1.995
CG1927	1	1.34915	1.17153	0.0334	0.315	Nab2 Only	0.0807195	0.099471	0.0765218	2.866	1.408
28SrRNA-Psi:CR45848	1	2.47899	1.83783	0.0338	0.2336	Nab2 Only	0.222466	0.344629	0.482724	2.859	1.62
CG15309	1	1.74463	1.4588	0.0341	0.1906	Nab2 Only	0.0943674	0.261083	0.158252	2.854	1.758
Inx3	1	1.44689	1.15271	0.0346	0.5443	Nab2 Only	0.0235813	0.176808	0.0723641	2.843	0.9716
wupA	1	1.17524	0.962734	0.0346	0.7758	Nab2 Only	0.0252405	0.0292135	0.0648261	2.845	0.6049
CG10553	1	6.21175	2.51813	0.0357	0.6374	Nab2 Only	0.592348	2.12381	0.495457	2.825	0.8228
Dyrk3	1	1.33926	1.27641	0.0358	0.0826	Nab2 Only	0.0966966	0.0387049	0.104058	2.822	2.299
CG9175	1	2.2602	1.51069	0.036	0.4452	Nab2 Only	0.394966	0.359702	0.119951	2.819	1.142
Sra-1	1	1.49497	1.02579	0.037	0.9845	Nab2 Only	0.0539959	0.168702	0.124237	2.802	0.146
chico	1	1.53309	1.17349	0.0378	0.584	Nab2 Only	0.112368	0.068991	0.193531	2.788	0.9074
CG9003	1	1.38991	1.17233	0.0384	0.3997	Nab2 Only	0.0391332	0.159794	0.0496487	2.779	1.228
Pde6	1	1.32654	1.12487	0.0385	0.4902	Nab2 Only	0.0973084	0.0892726	0.0572895	2.778	1.062
garz	1	1.24407	1.20576	0.0388	0.0778	Nab2 Only	0.0431608	0.075173	0.0641183	2.772	2.337
tutl	1	1.22359	1.20786	0.0391	0.0534	Nab2 Only	0.0708175	0.0459624	0.0515805	2.768	2.573
snmRNA:254	1	1.92195	1.74559	0.0401	0.0929	Nab2 Only	0.0757816	0.145119	0.376352	2.751	2.225
Rbp9	1	1.18001	1.16364	0.0402	0.06	Nab2 Only	0.0150087	0.0749607	0.0240981	2.75	2.5
CG43394	1	2.20756	1.35543	0.0402	0.6458	Nab2 Only	0.285035	0.376466	0.257068	2.751	0.8097
flw	1	1.44739	1.12371	0.0409	0.6792	Nab2 Only	0.111797	0.1245	0.109493	2.74	0.7577
a	1	1.49396	1.37758	0.0412	0.1146	Nab2 Only	0.140918	0.0993108	0.138495	2.736	2.091
Unc-76	1	1.29875	1.19362	0.0423	0.1895	Nab2 Only	0.0752101	0.0719049	0.0853346	2.719	1.762
fwe	1	1.50961	1.09886	0.0431	0.8238	Nab2 Only	0.0567052	0.207126	0.0839783	2.707	0.5251
CG8507	1	2.43824	2.06996	0.0432	0.1295	Nab2 Only	0.397413	0.428834	0.286642	2.705	2.012
CG32647	1	1.45258	1.21694	0.0442	0.3688	Nab2 Only	0.119034	0.13633	0.0982475	2.692	1.29
stj	1	1.35579	1.1891	0.0449	0.3075	Nab2 Only	0.0679466	0.100896	0.107743	2.682	1.425
CG6908	1	2.44582	1.76462	0.045	0.3108	Nab2 Only	0.430066	0.466478	0.183746	2.681	1.418
CG5708	1	2.44391	1.34054	0.0452	0.7597	Nab2 Only	0.17412	0.617302	0.15759	2.678	0.6315
rb	1	1.38576	1.37249	0.0457	0.053	Nab2 Only	0.0837418	0.152004	0.0346552	2.67	2.578
EndoGI	1	3.02671	2.82103	0.0458	0.0706	Nab2 Only	0.336285	0.753409	0.429537	2.669	2.398
Rab35	1	2.02474	1.49204	0.0462	0.3743	Nab2 Only	0.0702506	0.375078	0.276411	2.664	1.279
uex	1	1.44021	1.13799	0.0462	0.6296	Nab2 Only	0.130074	0.120478	0.097621	2.664	0.835
l(1)G0469	1	2.58002	1.26333	0.0465	0.8696	Nab2 Only	0.240682	0.668262	0.157712	2.66	0.4433
p120ctn	1	1.26028	1.11132	0.0467	0.4485	Nab2 Only	0.0639892	0.0683964	0.0749834	2.657	1.136
prel	1	1.58552	1.29816	0.047	0.3401	Nab2 Only	0.125412	0.210344	0.114315	2.653	1.351
CG31998	1	1.51701	1.13917	0.0476	0.7085	Nab2 Only	0.0625349	0.198446	0.118445	2.645	0.7119
Lamp1	1	1.39105	1.32942	0.0484	0.0938	Nab2 Only	0.0904247	0.124601	0.0967172	2.634	2.219
not	1	1.90677	1.67088	0.0491	0.1442	Nab2 Only	0.203474	0.305609	0.210086	2.625	1.942
Met	1	1.54012	1.3381	0.0495	0.2267	Nab2 Only	0.059979	0.129524	0.208218	2.62	1.64
Sec61gamma	1	2.70182	1.54719	0.0495	0.6247	Nab2 Only	0.422357	0.488	0.464657	2.621	0.8427
dj-1beta	1	1.42531	2.04714	0.0919	0.0007	Atx2 Only	0.190781	0.0883105	0.101312	2.232	5.496
Sxl	1	1.03942	1.15984	0.3927	0.0013	Atx2 Only	0.0127364	0.0129267	0.0343751	1.242	5.036
mRpS30	1	1.37439	2.68437	0.498	0.002	Atx2 Only	0.390852	0.0482593	0.189661	1.049	4.719
mtm	1	0.855025	1.96712	0.7237	0.0024	Atx2 Only	0.112428	0.107003	0.206214	0.6879	4.589
Pomp	1	1.05116	1.5855	0.9093	0.0045	Atx2 Only	0.0969286	0.122515	0.0726852	0.3636	4.162
egh	1	1.24618	1.44241	0.0947	0.0059	Atx2 Only	0.0677922	0.0818734	0.085225	2.213	3.977
unc-13	1	1.15585	1.24065	0.0564	0.0065	Atx2 Only	0.0177631	0.0437651	0.0584746	2.539	3.921
fipi	1	1.16597	1.55583	0.4323	0.0066	Atx2 Only	0.0953523	0.136542	0.0513701	1.166	3.906
Snx16	1	1.0639	4.83923	0.9971	0.0075	Atx2 Only	0.431724	0.300793	1.11339	0.06355	3.818
rdgB	1	1.06157	1.16182	0.2978	0.0077	Atx2 Only	0.0328035	0.0355839	0.0191333	1.449	3.808
nmo	1	1.29246	1.4789	0.081	0.0079	Atx2 Only	0.0653559	0.0485708	0.131824	2.312	3.785
noc	1	1.19227	1.59224	0.4035	0.0082	Atx2 Only	0.103653	0.121277	0.108367	1.221	3.761
Cog3	1	1.37879	2.01819	0.3267	0.0089	Atx2 Only	0.103031	0.254868	0.193016	1.381	3.712
CG32506	1	0.99952	1.9617	NA	0.0091	Atx2 Only	0.0668124	0.0734783	0.3028	0.001846	3.696
CG40191	1	1.15319	1.63184	0.6015	0.0101	Atx2 Only	0.150917	0.114999	0.0975947	0.8793	3.627
snoRNA:Psi18S-1377e	1	3.26521	4.67327	0.0984	0.0114	Atx2 Only	0.34085	0.631352	1.04524	2.188	3.549
CG13887	1	1.30699	1.65207	0.223	0.0121	Atx2 Only	0.0996829	0.0729146	0.191197	1.652	3.509
CG34330	1	0.818839	1.46384	0.3424	0.0133	Atx2 Only	0.10821	0.103125	0.0694457	1.346	3.447
CG4679	1	1.2713	2.68111	0.8065	0.0136	Atx2 Only	0.155824	0.0452294	0.576863	0.5545	3.436
Mo25	1	1.12051	1.36712	0.4616	0.0146	Atx2 Only	0.071803	0.100878	0.047487	1.113	3.39
CG4962	1	1.50753	2.05754	0.2397	0.0158	Atx2 Only	0.16075	0.1713	0.308797	1.602	3.338
Cyp1	1	1.07823	1.19878	0.3581	0.0159	Atx2 Only	0.0288922	0.0197723	0.0640514	1.313	3.335
deltaCOP	1	1.26711	1.36174	0.0667	0.0169	Atx2 Only	0.0730495	0.0590552	0.096116	2.434	3.297
Rcd1	1	1.2658	1.70722	0.4025	0.0181	Atx2 Only	0.0974502	0.177907	0.172442	1.223	3.253
Rox8	1	1.00122	1.3108	0.9999	0.0182	Atx2 Only	0.0620646	0.0488186	0.0866296	0.01273	3.247
CG14687	1	2.44672	2.89671	0.0641	0.0189	Atx2 Only	0.35188	0.221381	0.588711	2.459	3.223
x16	1	2.35469	3.41641	0.1852	0.0206	Atx2 Only	0.276584	0.649179	0.611147	1.777	3.17
phol	1	1.61696	1.8321	0.0777	0.0212	Atx2 Only	0.158882	0.244169	0.140014	2.338	3.153
Map205	1	1.25856	1.48938	0.2259	0.0227	Atx2 Only	0.109408	0.108085	0.116164	1.643	3.11
mbf1	1	1.33931	1.61246	0.2033	0.0232	Atx2 Only	0.153558	0.105778	0.154814	1.715	3.095
CG17378	1	1.24644	1.3705	0.1265	0.025	Atx2 Only	0.0629296	0.0957452	0.0950456	2.027	3.048
IRSp53	1	1.13264	1.40105	0.5262	0.0258	Atx2 Only	0.0537985	0.120373	0.0945032	1.001	3.028
CG3860	1	1.38119	1.59848	0.1525	0.0273	Atx2 Only	0.120252	0.0689748	0.201953	1.906	2.992
hrg	1	1.1911	1.44695	0.3788	0.0283	Atx2 Only	0.133113	0.0912639	0.0890273	1.27	2.97
cac	1	1.30245	1.4293	0.1189	0.0299	Atx2 Only	0.103026	0.0486893	0.138219	2.068	2.935
Usp8	1	0.85667	1.47398	0.5989	0.0306	Atx2 Only	0.105723	0.0446994	0.162168	0.8835	2.922
Ykt6	1	1.21531	2.00279	0.7658	0.032	Atx2 Only	0.118038	0.192539	0.359446	0.6212	2.893
CG32091	1	1.40956	1.6072	0.1431	0.0323	Atx2 Only	0.231596	0.101502	0.0488726	1.948	2.888
Kap3	1	1.17266	1.64516	0.6712	0.0328	Atx2 Only	0.216364	0.098124	0.137783	0.77	2.877
Chd1	1	1.18939	1.37972	0.3045	0.0331	Atx2 Only	0.0558991	0.0834795	0.12697	1.433	2.872
snoRNA:Psi18S-1086	1	2.33484	2.60167	0.0718	0.0335	Atx2 Only	0.13026	0.524986	0.419803	2.388	2.865
CG10863	1	1.03731	1.32037	0.9231	0.0337	Atx2 Only	0.0681712	0.0716513	0.0950654	0.3331	2.86
Sap47	1	1.12556	1.18709	0.1492	0.0337	Atx2 Only	0.0338946	0.030514	0.0658233	1.92	2.861
His4r	1	1.54207	1.64974	0.0739	0.0348	Atx2 Only	0.19994	0.128525	0.148288	2.37	2.84
CG14683	1	1.11949	1.27186	0.3914	0.0353	Atx2 Only	0.100869	0.0255191	0.0547376	1.245	2.832
snoRNA:Psi28S-291	1	1.33573	1.46469	0.1236	0.0356	Atx2 Only	0.182374	0.0396133	0.0754856	2.042	2.827
tea	1	1.25824	2.08344	0.7336	0.0359	Atx2 Only	0.194715	0.287524	0.317161	0.6725	2.822
Rpt4	1	0.997019	1.67012	0.9999	0.0362	Atx2 Only	0.117876	0.11794	0.239108	0.01252	2.815
CG8931	1	1.17379	1.71729	0.7285	0.0366	Atx2 Only	0.201667	0.174148	0.1638	0.6805	2.809
qkr58E-3	1	1.67716	2.43409	0.352	0.0367	Atx2 Only	0.382651	0.138782	0.475118	1.326	2.807
MtnA	1	1.19768	1.62667	0.5976	0.0367	Atx2 Only	0.0831999	0.23017	0.121871	0.8855	2.807
CG2924	1	1.04582	1.66448	0.9734	0.0381	Atx2 Only	0.173277	0.205294	0.115357	0.1919	2.784
lola	1	1.08116	1.13382	0.2173	0.04	Atx2 Only	0.0405139	0.0182386	0.0396212	1.67	2.753
Hs2st	1	1.63236	2.07611	0.2358	0.0405	Atx2 Only	0.202024	0.232984	0.367891	1.613	2.746
betaggt-II	1	1.3865	2.01521	0.5004	0.0405	Atx2 Only	0.230792	0.10487	0.375343	1.045	2.745
Pino	1	1.14943	1.18972	0.1025	0.0406	Atx2 Only	0.0365205	0.065824	0.0387034	2.162	2.745
CG43689	1	0.98641	2.5672	0.9996	0.0408	Atx2 Only	0.319513	0.246901	0.572137	0.02377	2.741
CG42389	1	1.01072	1.28336	0.9922	0.0413	Atx2 Only	0.0688047	0.0507593	0.093815	0.1034	2.734
Xpc	1	1.17261	1.60707	0.6667	0.0414	Atx2 Only	0.136778	0.0916017	0.216626	0.777	2.733
Rdl	1	1.23393	1.27079	0.0761	0.0421	Atx2 Only	0.0757224	0.0800785	0.0520534	2.351	2.721
Pcyt1	1	0.905131	1.2189	0.4297	0.0434	Atx2 Only	0.0749828	0.0170633	0.0627018	1.171	2.702
Dg	1	1.31584	1.42553	0.1317	0.0438	Atx2 Only	0.0886708	0.1058	0.135254	2.002	2.697
CG10433	1	1.31316	1.39656	0.1078	0.0438	Atx2 Only	0.0891045	0.15195	0.03729	2.13	2.697
CG34217	1	2.6691	2.87091	0.07	0.044	Atx2 Only	0.659269	0.50226	0.190488	2.404	2.694
Duba	1	1.27028	1.74174	0.5384	0.0441	Atx2 Only	0.234758	0.141671	0.196513	0.9813	2.693
sinu	1	1.57328	1.60452	0.0555	0.0445	Atx2 Only	0.153571	0.227935	0.0189355	2.549	2.687
CG45002	1	0.976926	1.38105	0.9811	0.0459	Atx2 Only	0.105872	0.0889209	0.107148	0.1616	2.668
CG17019	1	1.14067	1.35704	0.4999	0.0469	Atx2 Only	0.0720622	0.105416	0.10407	1.046	2.655
CG12913	1	2.55509	6.32986	0.6687	0.047	Atx2 Only	0.174942	0.873873	2.29404	0.7739	2.652
beat-IIb	1	2.05886	2.78099	0.2486	0.047	Atx2 Only	0.384063	0.529363	0.498643	1.577	2.652
CG11400	1	1.246	1.34961	0.1618	0.047	Atx2 Only	0.0902181	0.103842	0.0843832	1.867	2.653
PIP5K59B	1	1.04556	1.21184	0.7969	0.047	Atx2 Only	0.0255237	0.0587736	0.0739029	0.5705	2.652
mEFG1	1	2.0673	2.09797	0.0539	0.0479	Atx2 Only	0.225207	0.368573	0.269544	2.567	2.641
CG7589	1	2.22847	2.86426	0.1962	0.0481	Atx2 Only	0.411765	0.33553	0.683123	1.739	2.639
Invadolysin	1	1.22677	1.35617	0.2182	0.0497	Atx2 Only	0.0119699	0.110832	0.123859	1.667	2.618
Abi	1	1.51824	1.73534	0.1684	0.0502	Neither	0.188519	0.206749	0.201498	1.841	2.612
nudE	1	1.34187	1.52454	0.2075	0.0503	Neither	0.12409	0.20685	0.0488302	1.701	2.61
CG15012	1	1.27069	1.82006	0.6158	0.0515	Neither	0.232398	0.124733	0.283111	0.8568	2.596
Vps45	1	2.38405	3.35916	0.2688	0.0516	Neither	0.505662	0.343682	0.931099	1.522	2.594
Rpn8	1	1.29678	1.42912	0.1807	0.0516	Neither	0.1407	0.0683477	0.128779	1.794	2.594
CG14431	1	0.882367	1.81883	0.9051	0.0517	Neither	0.281616	0.121958	0.235234	0.3726	2.594
snoRNA:SC35-a	1	3.67582	3.65878	0.0511	0.0525	Neither	0.24128	0.682818	1.0313	2.601	2.584
RASSF8	1	1.34677	1.49809	0.1793	0.0525	Neither	0.0630138	0.169716	0.151507	1.799	2.584
Neb-cGP	1	1.32126	1.51735	0.2392	0.0526	Neither	0.190396	0.15103	0.0339981	1.603	2.582
sol	1	1.074	1.18561	0.5139	0.0542	Neither	0.0331448	0.0720741	0.0396071	1.022	2.564
CG9328	1	1.35515	1.79788	0.4462	0.0543	Neither	0.156043	0.160891	0.308489	1.141	2.563
Cdk12	1	0.746322	1.37406	0.1973	0.0547	Neither	0.104476	0.0842692	0.118519	1.735	2.559
syd	1	1.01566	1.30922	0.9878	0.0547	Neither	0.0976321	0.0441805	0.102168	0.1295	2.558
Rgk1	1	0.918688	1.35702	0.7898	0.0549	Neither	0.0331154	0.164535	0.0330896	0.5822	2.556
CG10560	1	1.20419	1.98817	0.8232	0.0557	Neither	0.0441368	0.143708	0.450833	0.5262	2.547
alpha-Cat	1	1.53778	1.83877	0.2295	0.0558	Neither	0.0651928	0.231201	0.324302	1.632	2.545
DCTN2-p50	1	1.76278	1.972	0.1328	0.056	Neither	0.23636	0.350715	0.200452	1.996	2.544
Jupiter	1	1.12219	1.35109	0.598	0.0561	Neither	0.0841492	0.0760165	0.125478	0.8849	2.542
Ziz	1	1.47858	1.55687	0.0991	0.0562	Neither	0.112213	0.222617	0.0994393	2.184	2.541
Dap160	1	1.22826	1.32018	0.1831	0.0596	Neither	0.0727789	0.106033	0.0893635	1.785	2.504
sxc	1	1.36399	1.40506	0.0907	0.0606	Neither	0.077683	0.15153	0.102915	2.241	2.493
CG31103	1	1.51488	1.62187	0.1208	0.0615	Neither	0.13241	0.253298	0.110699	2.057	2.485
Atg101	1	1.32045	1.62644	0.3804	0.0623	Neither	0.192026	0.189823	0.152054	1.267	2.476
CG4025	1	1.97481	2.17579	0.122	0.0626	Neither	0.433939	0.168505	0.349612	2.051	2.474
CG11504	1	1.05337	1.44966	0.9396	0.0629	Neither	0.0567677	0.127914	0.173484	0.2932	2.471
Rim2	1	1.55088	1.73199	0.1667	0.0645	Neither	0.055775	0.247863	0.262285	1.848	2.455
mub	1	1.14686	1.19192	0.159	0.0645	Neither	0.0257014	0.0834572	0.0392654	1.879	2.455
Vap33	1	1.29766	1.33877	0.104	0.0649	Neither	0.107923	0.0855909	0.0984557	2.153	2.451
CG8188	1	1.23226	1.66996	0.6219	0.0656	Neither	0.170799	0.107315	0.268443	0.8471	2.444
Rab1	1	1.22381	1.31072	0.1916	0.0664	Neither	0.0677633	0.0715004	0.121229	1.755	2.436
Golgin84	1	2.30976	3.01866	0.2509	0.0681	Neither	0.37288	0.4471	0.839284	1.57	2.42
wnd	1	1.20617	1.33389	0.2803	0.0686	Neither	0.00922336	0.0842173	0.146499	1.492	2.416
Buffy	1	1.40784	1.67748	0.2972	0.0694	Neither	0.283073	0.128342	0.148442	1.45	2.409
mamo	1	1.14475	1.22438	0.2568	0.0694	Neither	0.0763653	0.0603899	0.0594194	1.554	2.409
Tsp74F	1	1.42995	1.81206	0.3762	0.0695	Neither	0.300919	0.119528	0.256305	1.275	2.408
Hml	1	1.17649	1.20876	0.127	0.0709	Neither	0.0642304	0.0356669	0.077464	2.025	2.395
htl	1	1.92814	1.93616	0.0766	0.0742	Neither	0.151597	0.235502	0.395244	2.347	2.367
CG9451	1	1.21035	2.28292	0.8984	0.0752	Neither	0.232153	0.0924163	0.61757	0.3867	2.359
CG17919	1	1.52173	1.50595	0.0672	0.0755	Neither	0.109967	0.166188	0.171641	2.43	2.356
RpS27	1	1.15122	1.14021	0.0563	0.0756	Neither	0.0226812	0.0429725	0.0543523	2.54	2.355
Ptp4E	1	1.16758	1.52946	0.6878	0.0761	Neither	0.219918	0.107289	0.127365	0.744	2.351
snoRNA:Psi28S-3342	1	1.92612	1.94967	0.0836	0.0763	Neither	0.120821	0.453602	0.157035	2.291	2.35
CG6805	1	1.42885	1.74272	0.3383	0.0765	Neither	0.178713	0.0862183	0.332851	1.355	2.347
Pc	1	1.81726	2.3671	0.3172	0.0766	Neither	0.196457	0.522962	0.443823	1.403	2.347
IM3	1	1.12061	1.2597	0.4745	0.0766	Neither	0.0624894	0.0864975	0.0835312	1.09	2.347
CG12333	1	1.01585	1.32914	0.9907	0.0775	Neither	0.0852584	0.0805157	0.126233	0.1127	2.34
nclb	1	1.78751	1.99694	0.168	0.0784	Neither	0.353448	0.32613	0.206998	1.842	2.332
hdc	1	1.0916	1.42067	0.8347	0.0793	Neither	0.121671	0.0630686	0.174158	0.5062	2.325
NijA	1	2.08261	2.73132	0.2961	0.0795	Neither	0.630153	0.301451	0.587161	1.453	2.324
Vps20	1	0.909797	2.08071	0.9729	0.0796	Neither	0.348014	0.36867	0.26017	0.1939	2.323
CG34376	1	1.12653	1.39519	0.6889	0.0801	Neither	0.149576	0.0410132	0.139711	0.7424	2.319
NfI	1	1.3868	1.42177	0.1085	0.0802	Neither	0.119165	0.153863	0.108588	2.126	2.318
CG4302	1	1.64061	1.5796	0.0545	0.0804	Neither	0.153008	0.241699	0.110049	2.56	2.316
CG31211	1	1.49382	1.63779	0.181	0.0805	Neither	0.210747	0.163828	0.206273	1.793	2.316
Trf2	1	1.34935	1.35682	0.0869	0.0805	Neither	0.136546	0.0978972	0.0859595	2.267	2.316
GstE6	1	1.55274	2.61284	0.657	0.081	Neither	0.249059	0.323182	0.750843	0.7922	2.312
dpr18	1	1.35367	1.86507	0.5607	0.0811	Neither	0.349576	0.0899587	0.282576	0.9449	2.311
ND-B18	1	1.17986	1.88797	0.8566	0.0817	Neither	0.0547386	0.0728946	0.46267	0.4671	2.306
CG15068	1	1.45361	2.31478	0.6577	0.0835	Neither	0.386319	0.273213	0.518941	0.7911	2.293
CG8199	1	1.62708	2.13641	0.3814	0.0836	Neither	0.0952483	0.186563	0.569978	1.265	2.292
TMS1	1	1.08436	1.38401	0.8387	0.0862	Neither	0.0151148	0.0930052	0.184286	0.4992	2.272
Csp	1	1.15633	1.23062	0.2621	0.0863	Neither	0.0788607	0.0827785	0.0489316	1.54	2.271
Spt6	1	1.05727	1.37959	0.9189	0.0865	Neither	0.035274	0.134918	0.149956	0.3425	2.27
CG8108	1	1.15153	1.32361	0.4901	0.0866	Neither	0.0983701	0.11412	0.0883109	1.063	2.269
CG8485	1	1.47364	1.49414	0.1013	0.0874	Neither	0.255332	0.0450308	0.0650209	2.17	2.264
Lrch	1	1.04662	1.38496	0.947	0.0877	Neither	0.0896708	0.124511	0.141182	0.2739	2.261
IM1	1	1.29837	1.87364	0.6707	0.0883	Neither	0.39152	0.196068	0.181764	0.7708	2.257
Tsp66E	1	1.75856	1.7889	0.1013	0.0883	Neither	0.100189	0.378064	0.174091	2.17	2.257
Fur2	1	1.06652	1.10569	0.3112	0.0891	Neither	0.0155465	0.0445753	0.0328355	1.417	2.251
Gnpnat	1	1.40656	1.72418	0.3838	0.0902	Neither	0.135785	0.314262	0.197601	1.26	2.244
CG45050	1	1.2175	1.22724	0.105	0.0903	Neither	0.0642398	0.0369074	0.0995289	2.147	2.243
CG31999	1	1.70774	1.66441	0.0722	0.091	Neither	0.103855	0.342093	0.0662554	2.384	2.238
RecQ5	1	1.92218	2.12337	0.1713	0.0924	Neither	0.324691	0.438371	0.288939	1.83	2.229
Ppat-Dpck	1	0.745167	1.76923	0.6933	0.0936	Neither	0.0811473	0.201075	0.36474	0.7355	2.22
Pi3K92E	1	1.36403	1.45887	0.1898	0.0936	Neither	0.168907	0.162898	0.0950152	1.761	2.22
CG1998	1	0.891875	1.60976	0.8954	0.0944	Neither	0.293129	0.147607	0.0776026	0.3927	2.214
Dgk	1	1.41675	1.77463	0.4193	0.0947	Neither	0.34731	0.127967	0.21634	1.191	2.213
CG2811	1	1.85644	2.13279	0.2165	0.0949	Neither	0.38111	0.279016	0.412903	1.672	2.211
ATPsynF	1	1.2499	1.25599	0.1031	0.0949	Neither	0.100185	0.0782797	0.062795	2.158	2.211
Rpn11	1	1.24868	1.6514	0.6242	0.0952	Neither	0.094723	0.186586	0.294287	0.8435	2.209
CG34056	1	1.93863	2.81142	0.4446	0.0956	Neither	0.365155	0.339697	0.872996	1.143	2.207
Torsin	1	1.27232	1.85275	0.7136	0.096	Neither	0.267522	0.181093	0.346751	0.7038	2.204
l(3)neo38	1	1.25881	1.38305	0.2824	0.0965	Neither	0.183745	0.0958816	0.0499211	1.487	2.201
nsl1	1	1.22445	1.22827	0.1023	0.0966	Neither	0.0451537	0.0602899	0.102325	2.164	2.2
Sdr	1	2.1387	2.04294	0.0723	0.0992	Neither	0.345472	0.378559	0.282368	2.383	2.183
CG10984	1	1.16521	1.55942	0.753	0.1007	Neither	0.240437	0.122807	0.162655	0.6419	2.174
CkIIalpha	1	1.5335	1.63994	0.1767	0.1013	Neither	0.231367	0.1256	0.247298	1.809	2.17
be	1	0.840488	1.56836	0.7734	0.1013	Neither	0.145063	0.062523	0.279279	0.6089	2.17
KdelR	1	1.37934	1.34529	0.0724	0.1015	Neither	0.0784626	0.13006	0.122272	2.383	2.169
rost	1	1.59508	1.50223	0.054	0.1019	Neither	0.0880491	0.158777	0.218337	2.567	2.166
hts	1	1.12361	1.216	0.4007	0.1056	Neither	0.0409682	0.0811589	0.0834998	1.226	2.143
Vha16-1	1	1.12463	1.1479	0.1776	0.1057	Neither	0.0351115	0.046336	0.0613669	1.806	2.143
Vps35	1	1.08246	1.36704	0.8489	0.1059	Neither	0.0601579	0.0420036	0.196649	0.4812	2.142
Efr	1	1.34646	2.05497	0.7142	0.1061	Neither	0.274065	0.487581	0.22702	0.7029	2.14
CG10413	1	1.21225	1.48203	0.5624	0.1062	Neither	0.18707	0.117448	0.165339	0.9422	2.14
Prosap	1	1.22011	1.27452	0.2032	0.1063	Neither	0.134479	0.0470943	0.0663441	1.715	2.139
sgg	1	1.15234	1.19875	0.2271	0.1064	Neither	0.10785	0.028015	0.0231999	1.639	2.139
CG3792	1	1.94648	2.25749	0.2382	0.1071	Neither	0.274587	0.598727	0.294636	1.606	2.134
cbt	1	1.11225	1.16348	0.2919	0.1077	Neither	0.0852655	0.0161175	0.0360257	1.463	2.131
ana1	1	1.45522	1.83779	0.4371	0.1079	Neither	0.184971	0.146687	0.420054	1.157	2.129
RYBP	1	2.40183	3.02407	0.289	0.109	Neither	0.412616	0.483251	0.979614	1.47	2.123
snoRNA:Psi28S-1175c	1	2.75016	3.73562	0.3373	0.1092	Neither	0.131002	0.937312	1.26391	1.358	2.122
snoRNA:Psi28S-3308	1	3.26547	4.99154	0.4141	0.1104	Neither	0.533341	1.48833	1.6861	1.2	2.115
sut1	1	1.58511	2.48029	0.6292	0.1106	Neither	0.383905	0.314061	0.699566	0.8356	2.114
Edem1	1	1.02915	1.31278	0.9721	0.111	Neither	0.0727801	0.136446	0.09492	0.1967	2.111
CG2269	1	1.22285	1.3426	0.331	0.1115	Neither	0.130672	0.11363	0.0980183	1.372	2.109
ush	1	1.12317	1.65248	0.8938	0.1135	Neither	0.212869	0.081379	0.305322	0.3959	2.097
dnc	1	1.17408	1.31554	0.4374	0.1136	Neither	0.147547	0.0775415	0.0786902	1.157	2.097
kon	1	1.24611	1.88352	0.7889	0.1138	Neither	0.110278	0.0956651	0.495366	0.5837	2.095
vri	1	0.983565	1.36282	0.9935	0.1142	Neither	0.0645723	0.11152	0.168664	0.09483	2.094
vvl	1	1.4671	1.58554	0.2176	0.1145	Neither	0.121003	0.201395	0.249644	1.669	2.092
cpb	1	1.57192	1.64743	0.1671	0.1149	Neither	0.173885	0.201017	0.270845	1.846	2.09
Obp44a	1	1.26075	1.29465	0.1674	0.1157	Neither	0.0885355	0.118282	0.0902003	1.845	2.085
CG32032	1	1.27779	1.84925	0.7276	0.1158	Neither	0.324104	0.107676	0.363818	0.6818	2.084
Irk2	1	1.10711	1.20483	0.4746	0.1159	Neither	0.0263432	0.0902884	0.075148	1.09	2.084
MCU	1	0.786692	1.84746	0.8248	0.1167	Neither	0.305874	0.210318	0.333693	0.5234	2.079
Uck	1	1.55242	2.01872	0.4541	0.1171	Neither	0.423956	0.211536	0.369338	1.126	2.077
CG4757	1	1.20102	1.78923	0.8219	0.1176	Neither	0.197821	0.0413746	0.419819	0.5284	2.075
CG7218	1	1.65102	1.70308	0.1501	0.1185	Neither	0.21156	0.337904	0.118941	1.917	2.07
CG13585	1	1.25767	1.30152	0.1878	0.1186	Neither	0.137329	0.0935108	0.0652099	1.768	2.069
pwn	1	1.11033	1.7507	0.9354	0.119	Neither	0.307599	0.234858	0.219348	0.3037	2.067
CG31778	1	1.34031	1.28934	0.0672	0.1192	Neither	0.0752793	0.0786898	0.132552	2.43	2.066
lncRNA:CR34335	1	1.2136	1.18682	0.0749	0.1194	Neither	0.0534327	0.031599	0.0918004	2.361	2.065
ZnT49B	1	1.23421	1.35679	0.3395	0.1202	Neither	0.0718106	0.126031	0.154695	1.353	2.061
galla-1	1	1.44533	2.14741	0.6533	0.121	Neither	0.134358	0.347224	0.573213	0.798	2.056
Ih	1	0.966512	1.10375	0.7392	0.121	Neither	0.0520745	0.00956819	0.0318676	0.6637	2.056
CG2846	1	0.86505	1.4366	0.7576	0.1215	Neither	0.166003	0.0774819	0.185037	0.6348	2.054
CG12054	1	1.02574	1.26281	0.9709	0.1218	Neither	0.108162	0.0482396	0.102877	0.2009	2.052
CG10151	1	0.789139	2.77009	0.9576	0.1223	Neither	0.131728	0.309252	1.00318	0.2441	2.049
CG15097	1	0.537232	1.50771	0.1624	0.123	Neither	0.204388	0.0958947	0.203545	1.865	2.046
Nmnat	1	0.734013	1.89294	0.7735	0.1234	Neither	0.363413	0.255909	0.298141	0.6087	2.043
Atg4b	1	1.8689	2.19236	0.2818	0.1236	Neither	0.26932	0.516636	0.4144	1.488	2.043
AttA	1	0.945528	1.43847	0.9543	0.1239	Neither	0.223684	0.0985597	0.0973141	0.2536	2.041
CG6293	1	1.20256	1.41459	0.5289	0.124	Neither	0.161178	0.131425	0.136658	0.9969	2.04
CG31729	1	1.22739	1.24866	0.1633	0.125	Neither	0.120412	0.0600955	0.0653897	1.861	2.035
RhoGAP5A	1	2.06285	1.98307	0.0967	0.1252	Neither	0.277062	0.183806	0.489635	2.199	2.034
Hmr	1	1.67636	2.26515	0.4769	0.1258	Neither	0.399091	0.635297	0.138748	1.086	2.031
mts	1	1.21191	1.18493	0.079	0.1258	Neither	0.030321	0.0996054	0.0399481	2.327	2.031
CG15021	1	1.52127	1.72581	0.2951	0.1267	Neither	0.127701	0.181652	0.378341	1.455	2.026
CG4806	1	2.80435	3.51738	0.2963	0.1268	Neither	0.425104	0.497776	1.37372	1.452	2.026
AnxB11	1	1.36514	1.42097	0.1911	0.1269	Neither	0.163752	0.189265	0.0466146	1.757	2.025
shtd	1	1.1407	1.47803	0.7818	0.1275	Neither	0.0628964	0.16276	0.231009	0.5952	2.022
CG33203	1	1.34731	1.58749	0.4173	0.1279	Neither	0.127937	0.0997695	0.317046	1.194	2.02
Pgant1	1	1.09686	1.50454	0.8979	0.1281	Neither	0.152621	0.234951	0.123141	0.3876	2.019
CG11841	1	1.26922	1.42681	0.3776	0.1286	Neither	0.179909	0.112577	0.14871	1.272	2.017
CG13603	1	1.57546	1.65054	0.1838	0.1289	Neither	0.140533	0.235826	0.284465	1.783	2.015
CG8878	1	1.38406	1.57216	0.3399	0.1292	Neither	0.129257	0.188304	0.262468	1.352	2.014
CG14806	1	1.40822	2.06228	0.6694	0.1298	Neither	0.253115	0.245477	0.542474	0.7727	2.011
CG14438	1	0.982292	1.16665	0.9672	0.1298	Neither	0.0511936	0.0559798	0.0674659	0.2136	2.011
CG6739	1	1.8522	2.1938	0.3036	0.13	Neither	0.352152	0.345237	0.534843	1.435	2.01
Nopp140	1	1.10001	1.77317	0.9521	0.13	Neither	0.19801	0.199587	0.37804	0.26	2.01
PPP1R15	1	1.27728	1.21527	0.0522	0.1303	Neither	0.0580476	0.103728	0.055705	2.587	2.008
CG43367	1	1.08207	1.23329	0.713	0.1313	Neither	0.0646969	0.0839315	0.0954386	0.7048	2.003
CG9689	1	1.84084	2.03652	0.2324	0.1317	Neither	0.111443	0.508269	0.362679	1.624	2.001
CG7182	1	1.00993	1.62655	0.9993	0.1328	Neither	0.288797	0.145827	0.207516	0.03165	1.996
MESR4	1	1.39125	1.31495	0.0621	0.1329	Neither	0.0325928	0.0793534	0.17323	2.479	1.995
CG42268	1	1.04739	1.23221	0.8884	0.1334	Neither	0.0975691	0.0354186	0.0979113	0.4068	1.993
TfIIA-L	1	1.30233	1.70761	0.6192	0.1335	Neither	0.0634021	0.32653	0.280223	0.8513	1.993
Stlk	1	1.17768	2.0614	0.923	0.134	Neither	0.387516	0.38465	0.358346	0.3332	1.99
norpA	1	1.11634	1.1275	0.1753	0.1345	Neither	0.0203647	0.0426679	0.0627222	1.814	1.988
Tace	1	0.967813	2.21881	0.998	0.1348	Neither	0.264733	0.242084	0.660432	0.05245	1.986
Spn27A	1	1.08647	1.29195	0.786	0.1348	Neither	0.0723435	0.138129	0.0899394	0.5883	1.986
Pcl	1	0.933207	2.40744	0.9936	0.1353	Neither	0.210626	0.0790969	0.839304	0.09414	1.984
RhoGEF64C	1	1.09068	1.48673	0.9065	0.1353	Neither	0.253446	0.109781	0.118358	0.3696	1.984
CG7083	1	1.33788	1.65067	0.5104	0.1362	Neither	0.207144	0.114165	0.3257	1.028	1.98
Rat1	1	1.45297	2.27437	0.7138	0.1364	Neither	0.301092	0.244739	0.686631	0.7034	1.979
CG13124	1	1.07514	1.26504	0.8032	0.1372	Neither	0.138487	0.061953	0.0631834	0.56	1.975
Ac3	1	1.5782	1.66169	0.2007	0.1378	Neither	0.0816278	0.385737	0.115814	1.723	1.972
CG8369	1	1.43974	1.42291	0.1237	0.1395	Neither	0.107966	0.200402	0.13319	2.042	1.964
CG44837	1	1.19243	1.48687	0.6676	0.1398	Neither	0.191905	0.161637	0.171375	0.7756	1.962
Rok	1	1.30007	1.451	0.3614	0.1398	Neither	0.0761844	0.164004	0.215634	1.306	1.963
Tsp42El	1	1.42051	1.94436	0.6056	0.1403	Neither	0.333889	0.249498	0.417662	0.8728	1.96
ninaB	1	1.16166	1.49118	0.7514	0.1408	Neither	0.246756	0.0237263	0.181508	0.6444	1.958
ari-1	1	1.08834	1.4329	0.892	0.1408	Neither	0.123413	0.147195	0.190841	0.3996	1.958
SK	1	1.17906	1.19316	0.175	0.1408	Neither	0.0450379	0.0815008	0.0769785	1.815	1.958
CG14812	1	1.14075	2.37279	0.9711	0.1412	Neither	0.194905	0.316025	0.774998	0.2006	1.957
Cpr49Ag	1	1.14548	1.32497	0.6041	0.1415	Neither	0.156522	0.108338	0.0722126	0.8752	1.955
CG33493	1	1.4518	1.35497	0.0618	0.1426	Neither	0.0712614	0.19275	0.0865587	2.481	1.95
CG8329	1	1.08525	1.35861	0.86	0.145	Neither	0.0921789	0.127029	0.163334	0.4609	1.939
Sms	1	1.25547	1.73594	0.7349	0.1468	Neither	0.146633	0.162422	0.412323	0.6703	1.931
CG9257	1	2.15457	2.08379	0.1219	0.148	Neither	0.156293	0.591567	0.317519	2.051	1.926
GILT1	1	1.07597	1.56877	0.9532	0.1489	Neither	0.214497	0.191059	0.221046	0.2567	1.922
apt	1	1.83984	2.99235	0.6456	0.149	Neither	0.215605	0.466643	1.16135	0.8099	1.921
Drgx	1	1.27044	1.66366	0.6631	0.1491	Neither	0.243659	0.153584	0.309978	0.7828	1.921
lic	1	1.30445	1.54679	0.4868	0.1495	Neither	0.105039	0.178944	0.280604	1.068	1.919
drpr	1	0.937864	1.15922	0.6853	0.15	Neither	0.05379	0.0553818	0.0662547	0.748	1.917
Gli	1	1.34602	1.47262	0.318	0.1508	Neither	0.144865	0.146731	0.221332	1.401	1.914
spir	1	1.01637	1.13987	0.9642	0.1514	Neither	0.0377444	0.0339008	0.0739127	0.2236	1.911
Prx3	1	0.834999	1.51021	0.7681	0.1517	Neither	0.183829	0.134004	0.235261	0.6175	1.909
miple1	1	1.1544	1.40444	0.6976	0.1517	Neither	0.119482	0.0833444	0.21465	0.7289	1.909
Hem	1	1.25059	1.56797	0.625	0.1518	Neither	0.236687	0.158296	0.227312	0.8424	1.909
CG42240	1	1.13962	1.30857	0.612	0.1524	Neither	0.111172	0.0612669	0.152226	0.8627	1.907
CG14757	1	1.3022	2.03474	0.8052	0.1525	Neither	0.256871	0.177702	0.586929	0.5567	1.906
ps	1	1.1313	1.14747	0.2094	0.1531	Neither	0.0602154	0.0607632	0.0410566	1.695	1.903
dos	1	1.167	1.72739	0.8739	0.1552	Neither	0.151078	0.276373	0.349226	0.4349	1.894
CG17265	1	1.89101	2.20641	0.319	0.1554	Neither	0.268577	0.267398	0.682036	1.399	1.894
Su(var)3-3	1	1.51702	2.72723	0.7994	0.1558	Neither	0.40661	0.267439	1.00674	0.5663	1.892
Bem46	1	0.830528	1.71094	0.8656	0.1562	Neither	0.0694666	0.13114	0.436012	0.4507	1.89
Npc1a	1	1.18235	1.22601	0.2679	0.1564	Neither	0.0570844	0.0432063	0.127834	1.524	1.889
CG9953	1	1.07182	1.42708	0.9299	0.1573	Neither	0.209021	0.116001	0.140741	0.3171	1.886
Taf4	1	1.21126	1.27713	0.303	0.1578	Neither	0.0785419	0.161967	0.0077023	1.436	1.884
CG33143	1	0.852079	1.28317	0.5372	0.1581	Neither	0.142498	0.0763686	0.0883624	0.9833	1.882
Spn	1	0.99126	1.15763	0.9921	0.1586	Neither	0.019352	0.0709938	0.0716148	0.1042	1.88
Brf	1	1.6381	3.94834	0.8884	0.1588	Neither	0.413568	0.142305	1.87067	0.4068	1.88
CG12163	1	1.03526	1.1224	0.8146	0.1592	Neither	0.0276218	0.0589804	0.0461914	0.5408	1.877
Lsd-2	1	1.07052	1.16328	0.6452	0.1595	Neither	0.0371186	0.082429	0.0564052	0.8106	1.877
trol	1	1.16214	1.16772	0.1754	0.1596	Neither	0.030678	0.0942429	0.0465119	1.814	1.876
Caper	1	1.03215	1.18637	0.9272	0.1597	Neither	0.0912561	0.0343959	0.072799	0.3235	1.876
CG7888	1	1.30752	1.52237	0.4672	0.1602	Neither	0.276099	0.140708	0.143496	1.103	1.873
Patronin	1	1.26461	1.35622	0.3232	0.1611	Neither	0.177673	0.127673	0.0809493	1.389	1.87
Prosbeta1	1	1.07519	1.54393	0.9527	0.1616	Neither	0.142093	0.215183	0.24634	0.2582	1.868
DppIII	1	1.1802	1.17641	0.1526	0.1622	Neither	0.0512037	0.0922427	0.0477711	1.906	1.866
CG5555	1	1.50143	1.97098	0.55	0.1628	Neither	0.337992	0.105766	0.530971	0.9622	1.863
hdly	1	1.21647	1.82801	0.8456	0.1629	Neither	0.324091	0.41299	0.144337	0.487	1.863
CG3776	1	0.936913	1.55405	0.968	0.1649	Neither	0.275561	0.19764	0.137315	0.2112	1.855
Dbi	1	1.18271	2.3209	0.9534	0.1655	Neither	0.363376	0.242833	0.756143	0.2562	1.852
CG7379	1	1.79381	1.69102	0.1082	0.1655	Neither	0.193826	0.257967	0.323451	2.128	1.852
subdued	1	1.17825	1.2424	0.3362	0.1662	Neither	0.0996985	0.117587	0.0447744	1.36	1.849
cpx	1	1.16925	1.15055	0.117	0.1665	Neither	0.0536903	0.0461731	0.0702793	2.078	1.848
mats	1	1.42128	1.71636	0.4767	0.1669	Neither	0.065526	0.3498	0.314767	1.086	1.847
Sgt	1	1.4623	3.05879	0.8847	0.1674	Neither	0.0892812	0.170993	1.3534	0.4142	1.844
Mtl	1	1.26012	1.39012	0.3992	0.1677	Neither	0.218188	0.0700029	0.121086	1.229	1.844
MCTS1	1	1.16551	2.44093	0.9678	0.1678	Neither	0.133185	0.339192	0.885507	0.2117	1.843
CG3530	1	1.30171	1.30651	0.1756	0.1682	Neither	0.19448	0.0362194	0.0490347	1.813	1.842
Epac	1	1.1716	1.22527	0.318	0.1688	Neither	0.0508508	0.0254004	0.138837	1.401	1.839
CG12236	1	1.02667	1.35291	0.986	0.169	Neither	0.0874344	0.178912	0.124978	0.1389	1.838
Ctr1A	1	1.35885	1.6149	0.485	0.1696	Neither	0.219899	0.213019	0.272973	1.071	1.836
snoRNA:Psi28S-1192a	1	2.57635	2.16794	0.0625	0.1702	Neither	0.0778506	0.72741	0.271109	2.475	1.833
snRNA:U1:95Cc	1	1.60174	1.70226	0.4038	0.1706	Neither	0.0480713	0.380113	0.302461	1.22	1.832
CG2865	1	1.24139	1.43242	0.514	0.171	Neither	0.0234779	0.249148	0.145157	1.022	1.831
CG12099	1	1.25485	1.19927	0.0776	0.1716	Neither	0.111731	0.0435828	0.0585714	2.339	1.829
VhaM9.7-c	1	1.49767	3.416	0.9033	0.1718	Neither	0.349869	0.267539	1.55822	0.3764	1.827
Pi3K59F	1	1.43893	1.38216	0.1134	0.1721	Neither	0.0450925	0.0924358	0.234718	2.098	1.826
sun	1	1.01643	1.30802	0.993	0.1721	Neither	0.124462	0.0979232	0.132601	0.09744	1.826
CG13366	1	1.00091	1.26837	NA	0.1729	Neither	0.108603	0.0994941	0.103911	0.006203	1.823
Pli	1	1.06752	1.37716	0.926	0.1731	Neither	0.149276	0.115548	0.169124	0.3263	1.823
snoRNA:Psi28S-1192b	1	4.25989	5.21443	0.3145	0.1733	Neither	0.476564	0.959919	2.62282	1.409	1.822
ATP8B	1	1.10022	1.34101	0.8179	0.1734	Neither	0.130148	0.145989	0.119747	0.5352	1.821
CG7220	1	1.19456	1.169	0.1141	0.1741	Neither	0.0578407	0.0643	0.0739679	2.094	1.819
yrt	1	1.6922	1.4897	0.0537	0.1744	Neither	0.141454	0.177513	0.2395	2.569	1.818
Zcchc7	1	1.36388	1.31062	0.1081	0.1746	Neither	0.0967588	0.16721	0.0807697	2.128	1.817
Aduk	1	1.7746	3.38297	0.7851	0.1752	Neither	0.370905	0.430074	1.50479	0.5898	1.815
Alg11	1	1.54582	1.66193	0.2797	0.176	Neither	0.196526	0.313899	0.251231	1.494	1.812
Sec5	1	1.19711	1.54942	0.7484	0.1765	Neither	0.11105	0.169881	0.311566	0.6492	1.81
Nf1	1	1.185	1.31116	0.4825	0.1766	Neither	0.039754	0.161864	0.128768	1.076	1.809
Tak1	1	1.51477	1.41339	0.0891	0.1768	Neither	0.136816	0.179366	0.165818	2.252	1.808
Lk6	1	1.01884	1.07154	0.8517	0.1768	Neither	0.0186147	0.0325092	0.0307364	0.4762	1.808
Naa60	1	1.32732	1.73749	0.6515	0.1779	Neither	0.345224	0.175862	0.317025	0.8008	1.804
LIMK1	1	1.17667	1.45936	0.7204	0.1785	Neither	0.197754	0.114409	0.212783	0.6931	1.802
Klp98A	1	1.38997	1.43516	0.2355	0.1788	Neither	0.168616	0.102542	0.220482	1.614	1.801
CG6126	1	1.37552	1.43927	0.2624	0.179	Neither	0.121889	0.229569	0.147466	1.539	1.8
Rel	1	1.25065	1.33046	0.3349	0.18	Neither	0.158197	0.114376	0.112413	1.363	1.797
ocm	1	1.71917	1.69745	0.1666	0.1812	Neither	0.240577	0.256188	0.321948	1.848	1.792
Dnz1	1	0.8907	1.20949	0.5682	0.1824	Neither	0.0191665	0.0493357	0.13341	0.9327	1.788
CG3262	1	1.11645	1.24553	0.6217	0.1826	Neither	0.105411	0.0636155	0.114733	0.8475	1.787
hpo	1	0.79216	1.30216	0.401	0.184	Neither	0.0902256	0.120006	0.1435	1.226	1.782
CG2224	1	1.07189	1.43409	0.9389	0.1841	Neither	0.125118	0.125002	0.240393	0.295	1.781
eff	1	1.1679	1.13791	0.1015	0.1841	Neither	0.0784246	0.0458398	0.0271415	2.169	1.782
Rpn5	1	1.35181	1.61073	0.5117	0.1843	Neither	0.28027	0.190694	0.248012	1.026	1.781
CG31326	1	1.20807	1.24138	0.2643	0.1848	Neither	0.117097	0.0760833	0.0900419	1.534	1.779
zetaCOP	1	1.48116	1.66138	0.3671	0.1849	Neither	0.20581	0.355731	0.196327	1.294	1.778
pAbp	1	1.03133	1.06154	0.5865	0.1862	Neither	0.0211616	0.0348217	0.0120379	0.9031	1.774
beat-VI	1	2.15564	1.94658	0.1023	0.1867	Neither	0.424037	0.37218	0.331173	2.163	1.772
CG10011	1	1.20199	1.20878	0.2045	0.1877	Neither	0.0696741	0.115357	0.052378	1.711	1.769
pcm	1	0.891537	1.41923	0.8621	0.1882	Neither	0.0903972	0.178109	0.211125	0.4571	1.767
nSyb	1	1.14799	1.21415	0.4033	0.1882	Neither	0.0702383	0.0748647	0.107214	1.221	1.767
CG2993	1	1.34222	1.37254	0.233	0.1887	Neither	0.192541	0.123584	0.12025	1.622	1.765
snRNA:U12	1	0.835339	1.43324	0.2735	0.1895	Neither	0.153094	0.156277	0.74029	1.51	1.762
ITP	1	1.20678	1.30514	0.4176	0.1897	Neither	0.118338	0.117247	0.131394	1.194	1.761
CG1703	1	1.12789	1.53998	0.8832	0.1898	Neither	0.139958	0.227615	0.263844	0.4171	1.761
CG17211	1	1.17712	1.31708	0.5375	0.1903	Neither	0.165376	0.0537117	0.135987	0.9827	1.759
Sod3	1	0.912933	1.48187	0.9297	0.1906	Neither	0.207286	0.0595777	0.257138	0.3177	1.758
Set2	1	1.2711	1.31093	0.2652	0.1911	Neither	0.0794813	0.172994	0.103762	1.531	1.756
Ktl	1	1.14201	1.25332	0.5364	0.1911	Neither	0.156955	0.0508306	0.0631244	0.9846	1.756
CG43324	1	2.37898	2.77599	0.3363	0.1927	Neither	0.191242	0.999341	0.712763	1.36	1.751
Npc2b	1	1.23286	1.3184	0.3754	0.1942	Neither	0.0823895	0.159014	0.133465	1.277	1.746
DCP2	1	1.10162	1.11029	0.2377	0.1944	Neither	0.0364034	0.0464698	0.0500791	1.608	1.745
Galphaq	1	1.11145	1.19048	0.515	0.1948	Neither	0.0386383	0.103011	0.0761432	1.02	1.744
CG7149	1	1.02053	1.39806	0.9941	0.1951	Neither	0.151072	0.0855369	0.219396	0.08987	1.743
Syx5	1	1.07387	1.2638	0.8454	0.1956	Neither	0.0558803	0.0699535	0.162588	0.4874	1.741
egr	1	1.49261	1.82027	0.5007	0.1961	Neither	0.339073	0.32536	0.335948	1.044	1.739
CG31935	1	0.753238	1.39887	0.4827	0.1963	Neither	0.248918	0.0404639	0.12394	1.076	1.739
trus	1	1.5958	1.93053	0.4623	0.197	Neither	0.172239	0.557654	0.300425	1.112	1.736
Spt5	1	1.37651	1.65297	0.527	0.1974	Neither	0.0652008	0.345425	0.298303	1	1.735
e	1	1.34649	1.30076	0.1324	0.1974	Neither	0.158702	0.120983	0.0726539	1.998	1.734
wdb	1	1.13579	1.16093	0.2928	0.1983	Neither	0.0789971	0.0443425	0.068918	1.461	1.732
RpL38	1	1.9139	1.6989	0.0875	0.1987	Neither	0.138395	0.314996	0.355494	2.262	1.73
CG6870	1	0.98967	1.21895	0.9951	0.1987	Neither	0.0778626	0.0737505	0.11187	0.08164	1.73
Nmd3	1	0.860121	1.62278	0.8976	0.1992	Neither	0.248036	0.137684	0.337943	0.3883	1.729
Ubc4	1	1.32863	1.65453	0.6091	0.1995	Neither	0.354595	0.0462537	0.295709	0.8674	1.728
ND-B14	1	1.23459	1.82523	0.8435	0.1999	Neither	0.133499	0.326036	0.46762	0.4907	1.726
CG42342	1	1.11849	1.30962	0.7423	0.2012	Neither	0.201616	0.0491891	0.0738042	0.6588	1.722
wde	1	1.0625	1.3842	0.9449	0.2023	Neither	0.201227	0.148461	0.111754	0.2795	1.718
CG33543	1	1.30867	1.54981	0.5489	0.2027	Neither	0.147871	0.241255	0.27156	0.9639	1.717
lqf	1	0.957809	1.11462	0.7593	0.2027	Neither	0.0299719	0.0631492	0.042423	0.632	1.717
Cyp4e2	1	0.991401	1.38039	0.9989	0.2031	Neither	0.231588	0.121087	0.0737828	0.03878	1.716
GalT1	1	1.04717	1.70237	0.9903	0.2032	Neither	0.305105	0.109862	0.382673	0.1152	1.715
Atg8a	1	1.12854	1.16564	0.3496	0.2033	Neither	0.0877605	0.0585882	0.0534852	1.331	1.715
Hmgcr	1	1.65569	1.55662	0.1281	0.2036	Neither	0.24063	0.299557	0.102665	2.019	1.714
Nost	1	0.965431	1.34348	0.9785	0.2037	Neither	0.22108	0.0747177	0.0762785	0.1724	1.713
Cpr67B	1	1.38472	1.57101	0.4397	0.2045	Neither	0.218661	0.176091	0.297193	1.153	1.711
kug	1	1.27901	1.24703	0.1486	0.2071	Neither	0.095326	0.0972776	0.114166	1.923	1.702
CG30392	1	1.23515	1.54978	0.6983	0.2073	Neither	0.15709	0.274654	0.23766	0.7278	1.702
CG13685	1	1.15662	1.49972	0.8192	0.2076	Neither	0.0354919	0.237625	0.267887	0.5331	1.701
CaMKII	1	1.31438	1.43545	0.4003	0.2079	Neither	0.120356	0.267397	0.111727	1.227	1.7
Arpc1	1	0.924998	1.18243	0.7173	0.2084	Neither	0.0838712	0.0976014	0.0275168	0.698	1.698
EndoB	1	0.972889	1.59064	0.9955	0.2094	Neither	0.0595991	0.285684	0.31147	0.07779	1.695
Ten-a	1	0.953025	1.10457	0.6786	0.2114	Neither	0.036868	0.0542038	0.0381588	0.7585	1.689
IM33	1	1.09293	1.29935	0.8246	0.2118	Neither	0.152457	0.149184	0.0417699	0.5237	1.687
CG44195	1	1.76236	2.20636	0.4883	0.2119	Neither	0.525034	0.281927	0.642001	1.066	1.687
snRNA:U4:39B	1	1.8709	1.57219	0.054	0.2121	Neither	0.154874	0.303664	0.237767	2.566	1.686
cv	1	1.06078	1.33794	0.9356	0.2121	Neither	0.205915	0.071911	0.112597	0.3033	1.686
CG11975	1	1.28768	1.84997	0.7968	0.2122	Neither	0.235283	0.0993937	0.562234	0.5706	1.686
hui	1	1.52257	1.65771	0.3459	0.2125	Neither	0.239696	0.39541	0.121284	1.339	1.685
ATPsynCF6	1	1.15025	1.35439	0.7069	0.2125	Neither	0.142232	0.125478	0.174334	0.7143	1.685
CG7900	1	1.70902	1.93464	0.3753	0.2129	Neither	0.257739	0.3516	0.52177	1.277	1.684
scrib	1	1.10685	1.12113	0.2834	0.2131	Neither	0.0391628	0.055125	0.0565683	1.484	1.683
Gp210	1	1.37173	1.37455	0.2172	0.2132	Neither	0.10893	0.0880384	0.233913	1.67	1.683
Mau2	1	1.4016	4.35575	0.9709	0.2144	Neither	0.0645154	0.188218	2.44003	0.2009	1.679
RpL9	1	1.19576	1.14974	0.0976	0.2146	Neither	0.0138419	0.0289375	0.104472	2.194	1.678
Ndg	1	1.48392	1.48498	0.2167	0.2155	Neither	0.108519	0.263191	0.21142	1.671	1.675
CG8001	1	1.22362	1.37185	0.5234	0.2162	Neither	0.0984926	0.167609	0.190563	1.006	1.673
CG8132	1	2.22672	2.34586	0.268	0.2166	Neither	0.252893	0.506592	0.807094	1.524	1.672
CG6959	1	1.01835	1.32547	0.9935	0.2168	Neither	0.15947	0.130522	0.120117	0.09423	1.671
lap	1	1.15944	1.18218	0.2923	0.2169	Neither	0.087728	0.0975853	0.0247249	1.462	1.671
CG9400	1	2.6061	2.22359	0.0977	0.217	Neither	0.34526	0.745619	0.359949	2.193	1.671
kcc	1	1.21831	1.17468	0.1152	0.217	Neither	0.0855214	0.0935438	0.0182612	2.088	1.671
d4	1	1.38748	1.61327	0.4944	0.2171	Neither	0.144995	0.362922	0.222416	1.055	1.67
BicD	1	1.64967	1.4867	0.0925	0.2175	Neither	0.152497	0.224458	0.23221	2.228	1.669
bdl	1	0.972373	1.08725	0.8225	0.2187	Neither	0.0502748	0.0282961	0.0280971	0.5273	1.665
CG9649	1	1.19005	1.41113	0.6716	0.2189	Neither	0.169894	0.15404	0.197266	0.7695	1.665
His2Av	1	1.41304	1.69793	0.5364	0.2191	Neither	0.255559	0.374988	0.240774	0.9847	1.664
ple	1	1.14243	1.2566	0.574	0.2193	Neither	0.169134	0.0307847	0.0783688	0.9233	1.663
ci	1	1.24933	1.22647	0.1727	0.2214	Neither	0.0399455	0.0444592	0.156362	1.824	1.657
Drice	1	1.51192	1.93725	0.5857	0.2216	Neither	0.424741	0.465686	0.288396	0.9045	1.656
CG7708	1	0.796498	1.76341	0.8706	0.2217	Neither	0.120378	0.123755	0.537695	0.4413	1.656
GstE1	1	0.961566	1.61748	0.9922	0.2217	Neither	0.0843198	0.139709	0.426536	0.1031	1.656
Clic	1	1.39514	1.456	0.3042	0.2223	Neither	0.219201	0.231864	0.110483	1.433	1.654
Cdc42	1	1.1295	1.42032	0.8331	0.223	Neither	0.114933	0.152171	0.24642	0.509	1.652
CG7695	1	2.10669	4.48396	0.8246	0.2239	Neither	0.453395	0.651182	2.463	0.5238	1.649
CG6204	1	1.00591	1.56333	0.9997	0.2239	Neither	0.247914	0.295108	0.162859	0.0173	1.649
Ube3a	1	1.17966	1.26158	0.4514	0.2247	Neither	0.155749	0.0910641	0.0727389	1.131	1.647
Lis-1	1	1.15466	1.32285	0.6598	0.2254	Neither	0.131228	0.0489477	0.195403	0.7879	1.645
Syn2	1	1.12315	1.29193	0.7211	0.2268	Neither	0.144987	0.101204	0.127474	0.692	1.64
CG30499	1	0.768193	1.77731	0.8447	0.2272	Neither	0.136684	0.14333	0.546097	0.4887	1.639
CenB1A	1	1.35458	1.30573	0.1538	0.2273	Neither	0.0771114	0.122466	0.17685	1.9	1.639
tsr	1	1.4383	1.49915	0.302	0.2275	Neither	0.203406	0.15443	0.272126	1.438	1.638
CG13252	1	1.50857	1.73273	0.45	0.2291	Neither	0.266595	0.256462	0.406131	1.134	1.634
CG31145	1	1.17479	1.12119	0.0758	0.2297	Neither	0.0675781	0.0212129	0.0570957	2.353	1.632
CG8545	1	0.681179	1.43582	0.4187	0.2306	Neither	0.112423	0.27659	0.13504	1.192	1.629
Syx17	1	1.54471	1.48322	0.1702	0.2314	Neither	0.160533	0.25017	0.209778	1.834	1.627
CG14984	1	2.29464	2.34	0.2508	0.2316	Neither	0.454024	0.794227	0.426609	1.571	1.626
CG9747	1	0.947038	1.27561	0.9321	0.2325	Neither	0.06706	0.0881592	0.17602	0.3119	1.623
CG8728	1	0.819146	1.78222	0.904	0.2331	Neither	0.118919	0.179756	0.550112	0.3749	1.621
CG2681	1	1.24735	1.54598	0.6943	0.2335	Neither	0.127714	0.079419	0.384336	0.734	1.62
CG7675	1	1.00595	1.28331	0.9991	0.2352	Neither	0.106383	0.113415	0.148189	0.03393	1.615
Con	1	1.10141	1.52179	0.9317	0.237	Neither	0.104829	0.306091	0.23001	0.3129	1.61
Ythdf	1	2.09382	1.78892	0.0921	0.2374	Neither	0.263866	0.512394	0.168755	2.231	1.609
E23	1	0.768429	1.31934	0.4321	0.2375	Neither	0.13292	0.170114	0.111856	1.166	1.609
Tsp26A	1	1.60452	2.42923	0.7287	0.2377	Neither	0.620853	0.563215	0.694568	0.6801	1.608
CG4557	1	1.05789	1.257	0.91	0.2377	Neither	0.0416944	0.162634	0.100647	0.3622	1.608
CG5021	1	1.10927	1.31898	0.809	0.2382	Neither	0.119041	0.137536	0.161398	0.5503	1.607
eEF1delta	1	1.41117	1.52846	0.3898	0.2392	Neither	0.0984498	0.108992	0.375929	1.248	1.604
CG31751	1	1.09663	1.33256	0.8574	0.2395	Neither	0.206284	0.0850998	0.121601	0.4657	1.603
CG5676	1	1.22693	1.56228	0.7517	0.2418	Neither	0.0918074	0.323246	0.270647	0.6441	1.596
tws	1	1.2414	1.24706	0.2551	0.242	Neither	0.0787238	0.11086	0.132225	1.559	1.595
CG3815	1	1.26354	1.38879	0.4794	0.2421	Neither	0.189955	0.175676	0.148838	1.081	1.595
CG8786	1	1.96366	2.14154	0.3424	0.2422	Neither	0.290335	0.598122	0.571412	1.346	1.595
ZAP3	1	1.13926	1.40553	0.8105	0.2422	Neither	0.0799503	0.0917785	0.286665	0.5477	1.595
CG6659	1	1.30388	1.32166	0.2748	0.2424	Neither	0.153837	0.12739	0.14545	1.506	1.594
cic	1	1.10002	1.16661	0.5535	0.2427	Neither	0.101567	0.0432706	0.0648914	0.9566	1.593
cwo	1	1.04207	1.12651	0.8213	0.2432	Neither	0.0407911	0.0597026	0.0651546	0.5293	1.592
crp	1	1.20189	1.15584	0.1201	0.2436	Neither	0.047276	0.0835496	0.071935	2.061	1.591
CG13594	1	1.16535	2.37506	0.9736	0.2437	Neither	0.100505	0.138363	1.04492	0.1913	1.591
CG43707	1	1.10777	1.30735	0.8047	0.2439	Neither	0.101465	0.17509	0.122935	0.5574	1.59
Sara	1	1.07604	1.16828	0.7042	0.2439	Neither	0.0941277	0.0560767	0.0692531	0.7185	1.59
Vha100-1	1	0.988687	1.08635	0.9689	0.2443	Neither	0.0363555	0.0129273	0.0542374	0.2082	1.589
Chchd2	1	1.11375	1.25246	0.706	0.2444	Neither	0.0623511	0.0773234	0.167401	0.7157	1.588
CG11137	1	0.940861	1.33411	0.9444	0.245	Neither	0.1931	0.119628	0.122019	0.2809	1.587
CG40160	1	1.2745	1.30833	0.3129	0.245	Neither	0.134398	0.0960705	0.171274	1.413	1.587
CG11155	1	1.24442	1.21055	0.168	0.245	Neither	0.0687054	0.117991	0.0881414	1.842	1.587
Srp68	1	1.47075	1.51538	0.2978	0.2453	Neither	0.189826	0.275965	0.214934	1.449	1.586
CG32809	1	1.28454	1.25193	0.1813	0.2453	Neither	0.0633403	0.0829333	0.164166	1.791	1.586
snf	1	1.47524	2.14246	0.7419	0.2455	Neither	0.0579928	0.591006	0.652988	0.6594	1.585
CG7289	1	1.35698	1.31436	0.179	0.2457	Neither	0.0754873	0.13275	0.188883	1.8	1.585
Rab3	1	1.10027	1.15298	0.5043	0.2459	Neither	0.0842194	0.0732079	0.0391736	1.038	1.584
eEF1alpha1	1	1.11866	1.10646	0.1884	0.2459	Neither	0.0457288	0.0400021	0.0555045	1.766	1.584
CREG	1	1.97296	1.9278	0.221	0.2471	Neither	0.166368	0.528565	0.457787	1.658	1.581
mt:CoIII	1	1.2012	1.15809	0.1297	0.2474	Neither	0.0618903	0.0589534	0.087781	2.011	1.58
CG4393	1	1.01273	1.35094	0.9976	0.249	Neither	0.221897	0.0915188	0.129509	0.05717	1.576
CG9536	1	1.13402	1.86699	0.9579	0.2502	Neither	0.219398	0.163629	0.617399	0.243	1.572
CG7497	1	1.36683	1.41464	0.3224	0.2503	Neither	0.0938005	0.264531	0.159912	1.391	1.572
spoon	1	1.02189	1.30281	0.9906	0.2504	Neither	0.0298692	0.097179	0.212966	0.1136	1.572
CG9853	1	1.16983	1.47504	0.8022	0.2507	Neither	0.170809	0.212377	0.250711	0.5617	1.571
sau	1	1.40027	1.34351	0.1711	0.2508	Neither	0.103817	0.19116	0.156298	1.83	1.571
Axs	1	0.731211	1.50791	0.6338	0.2526	Neither	0.231226	0.13836	0.291966	0.8286	1.566
CG10479	1	2.32523	2.05487	0.14	0.254	Neither	0.171978	0.631484	0.505852	1.962	1.562
Dl	1	1.99108	1.80025	0.1462	0.2542	Neither	0.066696	0.532502	0.325821	1.933	1.561
CG32206	1	1.44454	1.59867	0.4362	0.2543	Neither	0.03079	0.311219	0.350525	1.159	1.561
Dh31-R	1	0.776265	1.5527	0.7601	0.2554	Neither	0.0751877	0.217696	0.368441	0.6306	1.558
MESR3	1	1.06739	1.56433	0.9751	0.2559	Neither	0.158714	0.134678	0.392202	0.1859	1.557
Bsg25D	1	0.952431	1.31513	0.9606	0.2559	Neither	0.0748125	0.0591533	0.228883	0.235	1.557
Mal-A5	1	1.04165	1.25752	0.955	0.256	Neither	0.0867517	0.0899169	0.159553	0.2517	1.556
Lapsyn	1	1.29481	1.82287	0.8048	0.2563	Neither	0.549549	0.191972	0.284387	0.5573	1.556
CG12746	1	1.12371	1.47293	0.8884	0.2563	Neither	0.296164	0.119365	0.19153	0.4069	1.556
FBXO11	1	1.43665	1.47542	0.3063	0.2564	Neither	0.245054	0.225279	0.17135	1.428	1.555
snmRNA:CR43603	1	1.50988	1.63546	0.3913	0.2577	Neither	0.256769	0.297928	0.311338	1.245	1.552
pps	1	0.861128	1.19277	0.4592	0.2581	Neither	0.0646884	0.0598474	0.124168	1.117	1.551
Arl5	1	0.896645	1.44998	0.9129	0.2585	Neither	0.26698	0.234401	0.0172271	0.3559	1.549
nej	1	0.954958	1.09731	0.705	0.2585	Neither	0.0582841	0.0401813	0.0300888	0.7172	1.549
CG6523	1	1.23017	1.3123	0.4462	0.2592	Neither	0.164307	0.156788	0.097469	1.141	1.548
CG6701	1	1.18515	1.24766	0.4373	0.2592	Neither	0.0645918	0.163656	0.0863905	1.157	1.548
CG9147	1	0.787406	2.26912	0.9525	0.2598	Neither	0.502267	0.144399	0.859054	0.2589	1.546
NSD	1	1.02898	1.31784	0.9855	0.2599	Neither	0.178108	0.105363	0.143536	0.1409	1.546
shakB	1	1.29056	1.22207	0.1279	0.2604	Neither	0.110145	0.0397022	0.13157	2.021	1.544
Sur-8	1	1.04939	1.26701	0.9427	0.261	Neither	0.13956	0.0274884	0.157172	0.2853	1.543
snoRNA:Psi18S-1820	1	1.31345	1.3322	0.2951	0.2612	Neither	0.139425	0.144258	0.171284	1.455	1.542
RpL39	1	1.42173	1.26148	0.0623	0.2636	Neither	0.124772	0.102212	0.132165	2.477	1.536
APP-BP1	1	1.52758	1.91987	0.6017	0.2647	Neither	0.192468	0.339817	0.622751	0.879	1.533
ebo	1	1.09248	1.19963	0.7097	0.2647	Neither	0.123789	0.0662118	0.0757492	0.71	1.533
CG1532	1	3.29437	2.58713	0.096	0.2679	Neither	0.352362	1.21335	0.171849	2.204	1.524
ND-B14.5B	1	1.16481	1.46776	0.8174	0.269	Neither	0.106128	0.243408	0.266945	0.5361	1.522
rad50	1	1.47358	2.61202	0.8678	0.2696	Neither	0.219669	0.322097	1.23909	0.4465	1.52
CG8306	1	1.223	1.29793	0.4487	0.2704	Neither	0.0688464	0.152018	0.173058	1.136	1.518
Hs6st	1	0.992732	1.26712	0.9988	0.2717	Neither	0.140202	0.1233	0.108643	0.04121	1.515
DIP-zeta	1	1.86694	3.2239	0.7851	0.2721	Neither	0.244292	0.293137	1.75906	0.5899	1.513
bon	1	1.13671	1.18778	0.4679	0.2721	Neither	0.0754282	0.117942	0.0591896	1.102	1.513
Eph	1	1.39232	1.34032	0.195	0.2726	Neither	0.0917419	0.201554	0.164222	1.743	1.512
Tango13	1	1.54867	1.40268	0.1206	0.2731	Neither	0.118082	0.266581	0.146864	2.058	1.511
RpS15	1	1.00768	1.10746	0.9915	0.2735	Neither	0.0494073	0.0280173	0.0661456	0.1079	1.51
CG7728	1	1.23441	1.91677	0.8993	0.2753	Neither	0.180511	0.0767868	0.719819	0.3848	1.505
salm	1	1.18849	1.57632	0.8433	0.2767	Neither	0.190087	0.255741	0.345607	0.4911	1.502
Pp2A-29B	1	0.985275	1.15523	0.9853	0.2773	Neither	0.086013	0.0543197	0.0756114	0.1423	1.5
Fbxl7	1	1.12237	1.40858	0.8664	0.2774	Neither	0.0867961	0.219692	0.235659	0.4492	1.5
ImpL2	1	1.06242	1.41152	0.963	0.2776	Neither	0.187673	0.110871	0.256029	0.2274	1.499
Dif	1	1.11848	1.20103	0.5995	0.2782	Neither	0.0541813	0.137231	0.0725451	0.8826	1.498
CG11317	1	1.30144	1.41081	0.4697	0.2785	Neither	0.218455	0.132194	0.218578	1.098	1.497
Dip-C	1	0.92605	1.31378	0.9143	0.2785	Neither	0.0737911	0.183626	0.163559	0.3528	1.497
CG42673	1	1.09598	1.47528	0.9361	0.2787	Neither	0.248499	0.11691	0.27562	0.3021	1.496
Ms	1	1.4004	3.54017	0.9603	0.2789	Neither	0.0407388	0.236533	2.06578	0.2358	1.496
Ddc	1	1.56627	1.53395	0.2465	0.2802	Neither	0.292235	0.191971	0.264114	1.583	1.492
sip3	1	1.49501	1.59606	0.3953	0.2814	Neither	0.204413	0.264686	0.35829	1.237	1.489
CG32850	1	1.19158	1.48811	0.7884	0.2815	Neither	0.132747	0.253334	0.281778	0.5844	1.489
CG5916	1	0.932287	1.41489	0.958	0.2821	Neither	0.279559	0.122252	0.153586	0.2428	1.488
CG9886	1	0.929651	1.74063	0.9855	0.2828	Neither	0.215034	0.292081	0.491069	0.1411	1.486
psidin	1	1.59856	1.35456	0.0593	0.2829	Neither	0.0345081	0.203949	0.206561	2.508	1.485
osp	1	1.5824	1.34299	0.0581	0.2835	Neither	0.0688233	0.181121	0.206337	2.52	1.484
CG6409	1	1.01297	1.10033	0.9734	0.2835	Neither	0.0558989	0.0394737	0.0466134	0.1919	1.484
cin	1	1.29491	1.57798	0.6798	0.284	Neither	0.233467	0.275742	0.312019	0.7566	1.483
CG10175	1	1.31358	1.47465	0.5404	0.2851	Neither	0.269025	0.157363	0.238951	0.9779	1.48
Wsck	1	0.934346	2.16704	0.9949	0.2854	Neither	0.143723	0.175012	0.93948	0.08321	1.479
CG3735	1	5.69166	3.76159	0.0592	0.2865	Neither	0.393255	1.4095	1.76277	2.508	1.476
CG6435	1	1.19598	1.64698	0.8678	0.2874	Neither	0.308707	0.127519	0.421066	0.4466	1.474
meso18E	1	1.35081	1.55216	0.5665	0.2883	Neither	0.0519443	0.409712	0.201074	0.9354	1.472
Leash	1	0.750969	1.44722	0.6394	0.2884	Neither	0.197835	0.11846	0.292072	0.8196	1.472
CG16799	1	0.661061	1.5877	0.6211	0.2887	Neither	0.23078	0.107804	0.417786	0.8484	1.471
CG31869	1	1.40741	1.44025	0.336	0.2891	Neither	0.0785223	0.266265	0.239695	1.36	1.47
bai	1	0.88315	1.21978	0.6639	0.2892	Neither	0.0773325	0.0723616	0.149429	0.7814	1.47
snoRNA:Psi28S-3571	1	4.09431	3.54749	0.1834	0.2896	Neither	0.353918	1.03061	1.82355	1.784	1.469
btz	1	0.876592	1.4588	0.8945	0.2903	Neither	0.12728	0.212311	0.292252	0.3946	1.467
CG11638	1	1.01515	1.64946	0.9991	0.2908	Neither	0.207938	0.385168	0.320805	0.03419	1.466
Nlg3	1	1.30759	1.34001	0.352	0.2911	Neither	0.0749717	0.149979	0.229453	1.326	1.465
CG10353	1	1.00162	1.29315	NA	0.292	Neither	0.180436	0.0467674	0.159656	0.008075	1.463
CanB2	1	0.885907	1.19808	0.6249	0.2922	Neither	0.0373196	0.0606444	0.149798	0.8425	1.463
CG3630	1	1.43719	1.70232	0.5827	0.2929	Neither	0.405222	0.240878	0.352963	0.9092	1.461
DNAlig3	1	1.18988	1.48356	0.796	0.2947	Neither	0.230749	0.236069	0.237469	0.5719	1.456
fidipidine	1	1.61856	1.57876	0.2563	0.2951	Neither	0.176723	0.244249	0.382547	1.555	1.455
eIF2Bbeta	1	1.33268	1.32536	0.2823	0.2955	Neither	0.0538939	0.209718	0.167858	1.487	1.454
AP-1-2beta	1	1.1202	1.24462	0.7069	0.2957	Neither	0.145184	0.0963772	0.109964	0.7144	1.454
tud	1	1.0576	1.10146	0.6357	0.2957	Neither	0.0657653	0.0402658	0.036877	0.8254	1.454
bs	1	1.05074	2.32973	0.9977	0.2964	Neither	0.618647	0.172068	0.919579	0.05541	1.452
Jra	1	0.67208	1.38202	0.3917	0.2976	Neither	0.0732243	0.138085	0.282546	1.244	1.449
CG5326	1	0.85197	1.27823	0.6709	0.2979	Neither	0.14498	0.0513666	0.178024	0.7706	1.448
ND-51	1	0.945072	1.11444	0.7196	0.2986	Neither	0.0566833	0.077414	0.0134143	0.6944	1.447
CG14722	1	1.43455	1.61841	0.5176	0.299	Neither	0.386623	0.293397	0.197112	1.016	1.446
CG10103	1	1.59025	1.77941	0.4734	0.3007	Neither	0.114297	0.372882	0.535049	1.092	1.442
kat-60L1	1	2.01973	2.18173	0.3932	0.3022	Neither	0.475551	0.721467	0.515987	1.241	1.438
CG9837	1	1.73126	1.72416	0.2967	0.3025	Neither	0.204717	0.477555	0.3329	1.451	1.437
CG10341	1	2.25965	2.1797	0.2645	0.303	Neither	0.152626	0.72025	0.685585	1.534	1.436
Pp1-87B	1	1.14887	1.15176	0.3149	0.3034	Neither	0.0791132	0.0536532	0.0873413	1.408	1.435
Nup358	1	1.1405	1.1742	0.4385	0.3048	Neither	0.12137	0.0356231	0.0787859	1.155	1.432
Roc1a	1	1.19374	1.37296	0.6889	0.3059	Neither	0.154989	0.148716	0.236635	0.7425	1.429
CG12213	1	1.18067	1.55404	0.8573	0.3062	Neither	0.25053	0.234087	0.328652	0.4659	1.429
CG10631	1	1.04024	1.15545	0.9067	0.3072	Neither	0.0616627	0.106276	0.0521436	0.3692	1.426
bowl	1	1.72356	1.74549	0.3261	0.308	Neither	0.253294	0.580457	0.099027	1.382	1.424
Ser7	1	1.082	1.46589	0.9553	0.308	Neither	0.311852	0.17735	0.178233	0.2507	1.424
PlexA	1	1.08686	1.10951	0.4528	0.3086	Neither	0.0554073	0.0180538	0.0740888	1.129	1.423
Sar1	1	1.21473	1.17564	0.1963	0.309	Neither	0.0814145	0.109411	0.0654505	1.738	1.422
Gbp3	1	0.964742	1.33444	0.9837	0.3091	Neither	0.0244527	0.161185	0.237524	0.1499	1.422
CG31760	1	0.914292	1.25779	0.8536	0.3092	Neither	0.170824	0.100761	0.100058	0.4725	1.421
SPR	1	1.04745	1.50442	0.987	0.3095	Neither	0.244366	0.257815	0.250695	0.1337	1.421
Cand1	1	1.62854	1.38983	0.0838	0.3097	Neither	0.0895658	0.29379	0.136654	2.29	1.42
Hsp27	1	1.19428	1.24491	0.4539	0.3097	Neither	0.108784	0.155204	0.0931927	1.127	1.42
CG4239	1	1.13984	1.23926	0.6332	0.3102	Neither	0.145137	0.0666245	0.130925	0.8294	1.419
lncRNA:CR30055	1	1.62115	1.48619	0.1757	0.3103	Neither	0.238778	0.271173	0.213573	1.813	1.419
alpha-Est3	1	1.37677	1.52471	0.5167	0.3112	Neither	0.328366	0.178123	0.25722	1.017	1.417
CG10802	1	1.52841	2.22882	0.7736	0.3118	Neither	0.112953	0.282919	1.01876	0.6086	1.415
Rab14	1	1.40016	1.4513	0.3861	0.3118	Neither	0.0423355	0.20924	0.326981	1.255	1.415
p38b	1	2.5485	2.16785	0.1596	0.3119	Neither	0.348099	0.933058	0.172738	1.876	1.415
ssp3	1	1.2159	1.38856	0.661	0.3122	Neither	0.214273	0.193718	0.172483	0.7859	1.414
nkd	1	1.10072	1.35171	0.8895	0.3129	Neither	0.0987551	0.136718	0.254035	0.4045	1.413
pes	1	1.1176	1.26885	0.7677	0.3129	Neither	0.137201	0.146121	0.118884	0.6181	1.413
Rhau	1	2.48949	1.86141	0.0664	0.3146	Neither	0.340183	0.645102	0.169746	2.436	1.409
Trx-2	1	0.88999	1.17815	0.6078	0.315	Neither	0.135844	0.0517016	0.0537518	0.8694	1.408
Cyp4s3	1	2.11894	1.71939	0.0984	0.3155	Neither	0.290586	0.379806	0.40431	2.188	1.407
La	1	0.977337	1.53203	0.9974	0.3164	Neither	0.263549	0.0779707	0.373695	0.05983	1.405
CG3505	1	0.958844	1.58354	0.9929	0.3166	Neither	0.369063	0.225686	0.268073	0.09904	1.404
CG42817	1	1.36835	1.27271	0.1547	0.3166	Neither	0.197044	0.0332573	0.129004	1.897	1.404
CG44838	1	1.25647	1.26425	0.3351	0.3168	Neither	0.170696	0.136143	0.0740628	1.362	1.404
CG11191	1	2.30203	2.4594	0.3881	0.3174	Neither	0.0680516	1.21796	0.36968	1.251	1.402
Sirup	1	1.27005	1.31109	0.4059	0.3179	Neither	0.164539	0.178882	0.121986	1.216	1.401
28SrRNA-Psi:CR45860	1	2.4641	1.87552	0.0771	0.318	Neither	0.141924	0.513016	0.550076	2.343	1.401
CG6084	1	0.956155	1.09818	0.763	0.318	Neither	0.0574249	0.0390222	0.0504701	0.6256	1.401
sas	1	1.08736	1.27827	0.8714	0.3183	Neither	0.123911	0.193501	0.0802085	0.4396	1.4
CG5953	1	1.41309	1.28143	0.1217	0.3191	Neither	0.0763302	0.10528	0.209401	2.052	1.398
vtd	1	0.816707	1.28672	0.5928	0.3196	Neither	0.203103	0.0823191	0.122984	0.8933	1.397
CG12877	1	1.02026	1.61013	0.9984	0.3199	Neither	0.326262	0.327109	0.269749	0.04639	1.397
CG32278	1	1.71774	1.46467	0.1036	0.3205	Neither	0.2937	0.218278	0.18006	2.155	1.395
RhoGAP93B	1	1.1702	1.20284	0.431	0.3217	Neither	0.110374	0.0928797	0.104949	1.169	1.393
Appl	1	1.25116	1.13741	0.056	0.3222	Neither	0.0540374	0.0682061	0.084023	2.543	1.391
CG3558	1	1.12728	1.23051	0.6725	0.3224	Neither	0.147037	0.0985574	0.0993483	0.768	1.391
snRNP-U1-70K	1	1.81089	1.78795	0.3051	0.3225	Neither	0.431248	0.529191	0.124685	1.431	1.391
CG3812	1	1.18445	1.193	0.3512	0.3234	Neither	0.095403	0.0901939	0.108318	1.327	1.389
CG5023	1	1.4398	1.62552	0.5416	0.3236	Neither	0.448825	0.302227	0.108592	0.976	1.388
S6k	1	1.04417	1.24629	0.956	0.324	Neither	0.111431	0.0625154	0.175963	0.2488	1.387
CG9062	1	1.17223	1.70267	0.9203	0.3252	Neither	0.200276	0.110587	0.57794	0.3394	1.385
robo2	1	1.80352	1.86219	0.3689	0.3254	Neither	0.0418831	0.517563	0.558905	1.29	1.384
CG13841	1	2.4067	2.27955	0.2692	0.3257	Neither	0.581379	0.762915	0.602535	1.521	1.383
RpL41	1	1.1124	1.1306	0.4194	0.326	Neither	0.0311623	0.0831944	0.0740632	1.19	1.383
CG12004	1	1.10588	1.39441	0.906	0.3268	Neither	0.196881	0.2371	0.165575	0.3707	1.381
alpha-Man-Ia	1	1.16894	1.13375	0.195	0.3273	Neither	0.102688	0.0357169	0.0476936	1.743	1.38
Idgf3	1	0.955289	1.18957	0.9265	0.3275	Neither	0.097123	0.12457	0.0582325	0.3253	1.379
bif	1	1.0552	1.0586	0.3645	0.3275	Neither	0.0357964	0.0330364	0.018297	1.299	1.379
GluRIB	1	1.99715	2.04104	0.3549	0.3284	Neither	0.36266	0.38113	0.761613	1.319	1.377
CG2781	1	1.34114	1.28165	0.2178	0.3284	Neither	0.0574366	0.206563	0.129494	1.668	1.377
CG17124	1	1.09182	1.22188	0.7975	0.329	Neither	0.145357	0.0604261	0.119293	0.5694	1.376
Tango5	1	1.21784	1.24173	0.3947	0.3299	Neither	0.143494	0.0956771	0.129193	1.238	1.374
Spt-I	1	1.77751	1.93766	0.4474	0.3304	Neither	0.339705	0.521259	0.559145	1.138	1.373
bip1	1	1.38351	2.39615	0.9032	0.3313	Neither	0.423268	0.288097	1.13756	0.3765	1.371
Eb1	1	1.16364	1.16833	0.3493	0.3318	Neither	0.0897618	0.0597773	0.105017	1.331	1.37
CG8032	1	1.14343	1.7106	0.9461	0.3319	Neither	0.258147	0.374398	0.443946	0.2764	1.369
sog	1	1.04089	1.16436	0.9201	0.3332	Neither	0.0804102	0.0531461	0.111372	0.34	1.367
CG4733	1	1.3044	1.6999	0.7827	0.3338	Neither	0.251099	0.405914	0.407972	0.5938	1.365
AsnS	1	1.15398	1.30983	0.7304	0.3347	Neither	0.184785	0.156685	0.137132	0.6774	1.363
Cyp313a1	1	1.231	1.28276	0.4612	0.3349	Neither	0.19276	0.152797	0.0637008	1.113	1.363
snRNA:U5:34A	1	6.10181	4.97886	0.1944	0.3358	Neither	0.131128	2.17278	2.84349	1.745	1.361
CG9248	1	0.923739	1.21825	0.8523	0.3365	Neither	0.0688163	0.104696	0.151544	0.475	1.359
beat-Ic	1	1.81767	1.82366	0.3411	0.3366	Neither	0.153345	0.473212	0.55097	1.349	1.359
Daxx	1	1.46681	1.32602	0.1439	0.3372	Neither	0.0909823	0.0889371	0.265122	1.944	1.358
step	1	1.06747	1.34939	0.9513	0.3373	Neither	0.187445	0.138769	0.212056	0.2622	1.358
Liprin-alpha	1	1.29754	1.21202	0.1532	0.3379	Neither	0.133526	0.0636777	0.121597	1.903	1.356
CG6769	1	0.565746	1.48555	0.4082	0.3385	Neither	0.116278	0.0991616	0.411445	1.212	1.355
CG30438	1	1.93081	1.75605	0.2184	0.3391	Neither	0.462308	0.313816	0.394898	1.666	1.353
cora	1	0.952215	1.09168	0.7137	0.3406	Neither	0.07849	0.0242975	0.0128486	0.7037	1.35
CG7646	1	1.85988	2.18241	0.5391	0.3417	Neither	0.720246	0.496168	0.623979	0.9802	1.348
Pten	1	1.61146	1.48217	0.2051	0.3418	Neither	0.348216	0.188545	0.187787	1.709	1.347
CG34377	1	1.09687	1.75458	0.9784	0.3421	Neither	0.124051	0.298764	0.605043	0.1729	1.347
Gabat	1	0.91159	1.23226	0.8314	0.3428	Neither	0.0436238	0.0787013	0.191329	0.5121	1.345
Fdx2	1	1.85331	2.34027	0.6161	0.343	Neither	0.179199	0.935997	0.762615	0.8562	1.345
pod1	1	1.06197	1.18717	0.8685	0.343	Neither	0.12641	0.105259	0.0446339	0.4453	1.345
CG9498	1	1.29527	1.32983	0.4132	0.344	Neither	0.210807	0.0896425	0.195035	1.202	1.343
Thd1	1	1.03237	1.12143	0.912	0.3441	Neither	0.0371511	0.0892149	0.0541381	0.3579	1.343
CG5059	1	1.29332	1.16309	0.069	0.3446	Neither	0.0713348	0.0987525	0.0856256	2.413	1.341
U2af38	1	0.73346	1.59232	0.7769	0.345	Neither	0.309032	0.161796	0.413737	0.6032	1.341
CG32276	1	1.10783	1.38943	0.9062	0.3466	Neither	0.265503	0.111515	0.210409	0.3703	1.337
mt:CoII	1	1.51525	1.26718	0.053	0.3468	Neither	0.0855542	0.141764	0.180333	2.578	1.337
Cad87A	1	1.24192	1.27262	0.4224	0.3477	Neither	0.19462	0.11303	0.109095	1.185	1.335
Mtor	1	0.9532	1.3743	0.9799	0.3482	Neither	0.17266	0.238272	0.17757	0.1668	1.334
CG3556	1	1.13007	1.40227	0.876	0.3484	Neither	0.317589	0.102457	0.158695	0.4311	1.333
Dyrk2	1	1.19637	1.26228	0.5282	0.3485	Neither	0.209221	0.0452218	0.110675	0.9981	1.333
sls	1	1.11027	1.08209	0.1824	0.3495	Neither	0.0546311	0.0298993	0.0427648	1.788	1.331
CG14661	1	1.24131	1.21559	0.2814	0.3496	Neither	0.0952643	0.143553	0.098471	1.489	1.331
snRNA:U5:23D	1	3.15236	2.4987	0.1516	0.35	Neither	0.256043	1.1494	0.71973	1.91	1.33
CG10562	1	2.23425	1.85118	0.1475	0.3501	Neither	0.554181	0.382794	0.401316	1.928	1.33
Alg1	1	1.2997	1.45051	0.5997	0.3517	Neither	0.20643	0.221327	0.285455	0.8823	1.326
CG4552	1	1.02837	1.12402	0.9356	0.3521	Neither	0.0792123	0.0656487	0.0504799	0.3032	1.325
CG2818	1	1.40832	1.43245	0.3881	0.3523	Neither	0.220911	0.264827	0.202088	1.251	1.325
CG10055	1	1.05998	1.44567	0.977	0.3527	Neither	0.231577	0.18801	0.284467	0.1782	1.324
ATPsynE	1	1.19123	1.18054	0.3179	0.3533	Neither	0.0839225	0.0894555	0.113541	1.401	1.323
tmod	1	1.16726	1.09393	0.0757	0.3535	Neither	0.0630437	0.0565572	0.0199254	2.354	1.322
dati	1	0.990339	1.18798	0.9966	0.3539	Neither	0.0946632	0.115074	0.0902745	0.06791	1.321
Fmo-2	1	1.20993	1.26408	0.4988	0.3555	Neither	0.148176	0.160649	0.111575	1.048	1.318
ABCA	1	1.14864	1.22592	0.6102	0.3567	Neither	0.171728	0.0760156	0.0947068	0.8656	1.316
mld	1	1.02996	1.08443	0.8568	0.3567	Neither	0.0251018	0.0546599	0.0505939	0.4668	1.316
PPO1	1	0.85226	1.42388	0.8614	0.3568	Neither	0.0977213	0.200311	0.325737	0.4584	1.315
M6	1	1.29652	1.36537	0.4876	0.357	Neither	0.168775	0.202954	0.214763	1.067	1.315
CG16868	1	0.659798	1.40074	0.4605	0.3578	Neither	0.189043	0.23957	0.215717	1.115	1.313
Dcr-1	1	0.952422	1.19606	0.9293	0.3581	Neither	0.136432	0.0723896	0.0979937	0.3186	1.313
Esyt2	1	1.00823	1.20775	0.998	0.3588	Neither	0.085598	0.0593369	0.163748	0.05195	1.311
Asph	1	1.15497	1.24863	0.6411	0.3589	Neither	0.16271	0.0957077	0.135348	0.8171	1.311
bur	1	0.908814	1.14718	0.644	0.3589	Neither	0.0635302	0.0692773	0.10035	0.8122	1.311
Sugb	1	1.75882	1.84979	0.4303	0.3594	Neither	0.346168	0.612312	0.369373	1.17	1.31
snRNA:U4:38AB	1	2.25742	1.78144	0.1119	0.3598	Neither	0.237284	0.564865	0.398946	2.106	1.309
Arp2	1	1.56387	1.44908	0.2265	0.3607	Neither	0.101443	0.229539	0.337776	1.641	1.307
CG17593	1	1.12451	1.37309	0.8733	0.361	Neither	0.194495	0.252232	0.144394	0.4361	1.307
spi	1	1.32876	1.3408	0.3836	0.3611	Neither	0.201798	0.159167	0.189857	1.26	1.306
Camta	1	1.11521	1.15082	0.5284	0.3612	Neither	0.0889624	0.0922701	0.0597783	0.9977	1.306
gfzf	1	1.0162	1.33578	0.9971	0.3616	Neither	0.125153	0.192709	0.215534	0.06296	1.305
ND-13A	1	2.09163	1.56622	0.0586	0.3618	Neither	0.255585	0.417373	0.207281	2.515	1.305
alien	1	1.4487	1.65138	0.5896	0.3622	Neither	0.365791	0.305995	0.383212	0.8983	1.304
CG15611	1	0.682625	1.45359	0.5813	0.3627	Neither	0.20457	0.238933	0.287867	0.9116	1.303
dx	1	1.55865	1.50172	0.2972	0.3631	Neither	0.363676	0.187452	0.234982	1.45	1.302
Dbp80	1	1.16	1.40434	0.8296	0.3632	Neither	0.213277	0.175454	0.261558	0.5152	1.302
Lrp4	1	1.06195	1.11133	0.7013	0.3644	Neither	0.0736688	0.0355901	0.0656936	0.7231	1.3
nonA-l	1	2.0216	2.98393	0.736	0.3649	Neither	0.468445	0.366916	1.77413	0.6686	1.298
CG13760	1	1.23291	1.8025	0.9031	0.3649	Neither	0.219085	0.167873	0.704844	0.3768	1.298
Nep3	1	1.04398	1.78125	0.9961	0.3651	Neither	0.151088	0.126462	0.71044	0.07306	1.298
IntS11	1	1.07048	1.33922	0.9487	0.3659	Neither	0.261664	0.15766	0.0968617	0.2693	1.296
tna	1	1.17224	1.16982	0.357	0.3659	Neither	0.0849203	0.0815294	0.108976	1.315	1.296
jvl	1	0.991417	1.07244	0.9829	0.3661	Neither	0.0238259	0.0292902	0.0571087	0.1535	1.296
CG14207	1	1.4669	1.35212	0.2025	0.3664	Neither	0.202416	0.219865	0.146644	1.718	1.295
CG10516	1	1.02058	1.30601	0.9944	0.3664	Neither	0.222348	0.0738236	0.169781	0.08712	1.295
CG13044	1	3.36387	3.14094	0.3056	0.3665	Neither	0.666549	1.75407	0.760039	1.43	1.295
OstDelta	1	1.3027	1.50403	0.6663	0.3666	Neither	0.108495	0.299288	0.354887	0.7776	1.295
IM14	1	2.20171	1.91973	0.2104	0.3667	Neither	0.310562	0.526577	0.619228	1.691	1.295
CG42402	1	1.6111	1.48063	0.2249	0.3667	Neither	0.307663	0.231276	0.242061	1.646	1.295
pinta	1	0.968612	1.26551	0.983	0.3675	Neither	0.187604	0.0998133	0.134491	0.1529	1.293
cg	1	1.1636	1.24281	0.6067	0.3675	Neither	0.136231	0.109956	0.149155	0.8712	1.293
Rpn12	1	1.90048	1.48421	0.07	0.3677	Neither	0.345365	0.25313	0.1648	2.404	1.293
snoRNA:Psi18S-1854c	1	1.89531	1.94634	0.4026	0.3678	Neither	0.2107	0.698812	0.521147	1.223	1.292
CG6144	1	1.32375	1.48715	0.6145	0.3678	Neither	0.385572	0.201555	0.154397	0.8589	1.292
CG4645	1	1.09201	1.45858	0.9525	0.3693	Neither	0.233527	0.249231	0.270462	0.2586	1.289
CG42390	1	1.22206	1.29887	0.553	0.3698	Neither	0.0905249	0.23877	0.124536	0.9573	1.288
Nurf-38	1	1.12906	1.09559	0.1965	0.3703	Neither	0.0506877	0.062091	0.0429702	1.738	1.287
Vps51	1	1.717	2.79401	0.8305	0.3714	Neither	0.552079	0.499878	1.53916	0.5136	1.285
CG6567	1	1.2459	1.62831	0.8368	0.3719	Neither	0.237951	0.457319	0.305746	0.5025	1.284
CG32758	1	1.10704	1.11515	0.4186	0.3727	Neither	0.0840224	0.0419287	0.0572553	1.192	1.282
Dh31	1	0.779356	1.41996	0.7329	0.373	Neither	0.244606	0.286615	0.137896	0.6735	1.282
kis	1	1.13263	1.0995	0.2051	0.373	Neither	0.0400139	0.0709486	0.0490312	1.709	1.282
Men	1	1.04222	1.10761	0.8368	0.3733	Neither	0.0568818	0.0606365	0.0605858	0.5026	1.281
l(2)01289	1	1.19889	1.29904	0.619	0.3736	Neither	0.183826	0.158741	0.151056	0.8517	1.28
CG31710	1	1.47458	1.87385	0.7191	0.3738	Neither	0.170615	0.454529	0.68065	0.6952	1.28
Rim	1	1.09492	1.15541	0.6646	0.375	Neither	0.109472	0.0834049	0.0570354	0.7804	1.278
CG3775	1	1.2004	1.14708	0.1959	0.3753	Neither	0.0768844	0.0688007	0.0962052	1.74	1.277
CG14982	1	1.15619	1.25968	0.6732	0.3762	Neither	0.133167	0.0935179	0.18903	0.7669	1.275
RpA-70	1	1.09563	1.53633	0.9631	0.3767	Neither	0.344895	0.139646	0.356921	0.2272	1.274
CG31997	1	1.39893	1.3852	0.3559	0.3777	Neither	0.200103	0.240019	0.199797	1.317	1.272
CG31635	1	1.06472	1.1197	0.7249	0.3792	Neither	0.0557498	0.0802049	0.0616882	0.6862	1.269
CG12393	1	1.37138	2.35184	0.9163	0.3795	Neither	0.207056	0.18491	1.27541	0.3485	1.268
RluA-1	1	1.01184	1.37955	0.9988	0.3797	Neither	0.222716	0.277106	0.0893087	0.03955	1.268
CG13248	1	0.654532	1.29541	0.284	0.3798	Neither	0.195222	0.116306	0.172587	1.483	1.268
pHCl-1	1	1.5022	1.26539	0.0706	0.3802	Neither	0.221342	0.0481725	0.120416	2.398	1.267
Cp190	1	0.811178	1.19289	0.3947	0.3812	Neither	0.0731785	0.10662	0.134785	1.238	1.265
Tomosyn	1	1.06018	1.10653	0.7068	0.3812	Neither	0.0665118	0.0378972	0.0691495	0.7145	1.265
Obp57b	1	2.71505	2.06558	0.1253	0.382	Neither	0.365521	0.847801	0.46327	2.033	1.263
Ctl2	1	0.916622	1.19648	0.8173	0.382	Neither	0.139091	0.102671	0.0799071	0.5362	1.263
CG4725	1	0.989907	1.46187	0.9994	0.3825	Neither	0.411975	0.11364	0.134823	0.02758	1.262
Mp	1	1.40286	1.26845	0.1553	0.3826	Neither	0.0507361	0.244182	0.0751843	1.894	1.262
Mpc1	1	0.878689	1.16948	0.5873	0.3836	Neither	0.111166	0.0959814	0.0745758	0.902	1.26
nAChRalpha6	1	1.13515	1.32434	0.8238	0.3837	Neither	0.123813	0.245154	0.154757	0.5251	1.26
spz	1	1.31605	1.4006	0.5315	0.3847	Neither	0.286818	0.156397	0.212963	0.9926	1.258
CG7800	1	2.98033	2.06135	0.0767	0.3852	Neither	0.387501	0.762328	0.581262	2.346	1.257
FoxP	1	1.09749	2.36865	0.9941	0.3859	Neither	0.292648	0.20542	1.28634	0.08943	1.256
TFAM	1	0.949209	1.38168	0.9798	0.3864	Neither	0.127706	0.174121	0.303674	0.1669	1.255
CG6847	1	2.2065	1.78002	0.1456	0.3878	Neither	0.290078	0.477771	0.519661	1.936	1.252
tio	1	1.11189	1.40571	0.9179	0.3882	Neither	0.098151	0.285736	0.257939	0.3449	1.251
Atet	1	0.950422	1.239	0.9524	0.3893	Neither	0.162599	0.098635	0.137034	0.259	1.249
Ac78C	1	1.09855	1.34828	0.9142	0.3897	Neither	0.128552	0.265109	0.173264	0.3531	1.248
Sirt1	1	1.65049	1.31071	0.0503	0.3903	Neither	0.188843	0.19712	0.136523	2.61	1.247
RpL23A	1	1.12105	1.15292	0.535	0.3904	Neither	0.0957527	0.0782637	0.085313	0.9868	1.247
PKD	1	1.35457	1.30291	0.2944	0.3913	Neither	0.0896924	0.160471	0.234554	1.457	1.245
mtt	1	1.19303	1.53349	0.8658	0.3915	Neither	0.196826	0.294962	0.387206	0.4503	1.244
mth	1	0.831152	1.60145	0.9161	0.3925	Neither	0.324064	0.101906	0.48593	0.3488	1.242
ND-49	1	0.950137	1.22052	0.9444	0.3925	Neither	0.135636	0.11937	0.120899	0.2809	1.242
Gprk2	1	1.16339	1.22659	0.5918	0.3933	Neither	0.195963	0.0639204	0.0868129	0.8947	1.241
Dph1	1	2.79034	2.66665	0.3489	0.3936	Neither	0.126163	1.38803	0.875181	1.332	1.24
RpS28b	1	1.27451	1.17916	0.1539	0.3936	Neither	0.0520794	0.0958085	0.139321	1.9	1.24
spen	1	1.06708	1.06743	0.397	0.3937	Neither	0.0444901	0.0337572	0.0362861	1.234	1.24
MED15	1	2.54296	2.32049	0.2983	0.3943	Neither	0.200153	1.02984	0.777047	1.447	1.239
CG5909	1	1.12335	1.22074	0.7211	0.3944	Neither	0.149063	0.111308	0.114194	0.6921	1.238
Top1	1	1.22308	1.24058	0.4425	0.395	Neither	0.082961	0.163131	0.152383	1.147	1.237
pea	1	1.21116	1.63663	0.8868	0.3955	Neither	0.148977	0.256094	0.556704	0.4101	1.236
CG10600	1	1.40788	1.19328	0.0507	0.3965	Neither	0.146235	0.104896	0.066234	2.605	1.234
Kaz1-ORFB	1	0.776823	2.49186	0.9755	0.3981	Neither	0.258389	0.321525	1.42526	0.1842	1.231
Dop1R1	1	0.923284	1.13777	0.7259	0.3992	Neither	0.0887689	0.0889447	0.0552002	0.6846	1.229
shn	1	1.13825	1.18741	0.5843	0.3993	Neither	0.128423	0.130669	0.0362409	0.9066	1.229
CG1513	1	1.00484	1.3253	0.9997	0.3998	Neither	0.116074	0.133858	0.271773	0.01829	1.228
CG9911	1	1.43912	1.32164	0.215	0.3998	Neither	0.14953	0.0799193	0.2723	1.677	1.228
CG6830	1	1.35403	1.55678	0.6646	0.4003	Neither	0.126854	0.385244	0.379897	0.7802	1.227
ltl	1	1.05142	1.20083	0.9313	0.4011	Neither	0.134243	0.116862	0.0927767	0.3138	1.225
uif	1	1.0229	1.10741	0.9518	0.4024	Neither	0.0641319	0.0795542	0.0335743	0.2608	1.223
Spn47C	1	1.1587	1.4539	0.878	0.403	Neither	0.343039	0.159575	0.25268	0.4272	1.222
CG46339	1	1.22506	1.20772	0.3529	0.4031	Neither	0.131865	0.127825	0.0982167	1.324	1.222
CG9426	1	1.05516	1.30078	0.9641	0.4037	Neither	0.0179902	0.197527	0.227503	0.2238	1.221
CIAPIN1	1	0.624314	1.24821	0.1669	0.4039	Neither	0.221815	0.079208	0.0813674	1.846	1.22
Vago	1	1.54924	1.88636	0.6804	0.4042	Neither	0.109222	0.169606	0.867006	0.7557	1.22
pins	1	1.90763	1.47175	0.0768	0.4046	Neither	0.221363	0.367934	0.200892	2.345	1.219
PGRP-LE	1	1.33104	1.61894	0.7469	0.4048	Neither	0.232758	0.433205	0.381285	0.6515	1.218
CG5945	1	1.13229	1.16633	0.546	0.4049	Neither	0.0447773	0.130676	0.0943059	0.9687	1.218
CG7772	1	1.09504	1.43919	0.9509	0.4055	Neither	0.297878	0.28062	0.167035	0.2633	1.217
PGRP-SB1	1	1.25289	1.6911	0.8685	0.4057	Neither	0.287014	0.222043	0.593626	0.4452	1.217
Mpcp1	1	1.09475	1.30269	0.9013	0.4059	Neither	0.154171	0.122233	0.232821	0.3807	1.216
Mtch	1	1.14941	1.32807	0.8071	0.4063	Neither	0.161486	0.122105	0.26135	0.5535	1.215
Cdc27	1	0.945091	1.1256	0.8202	0.4064	Neither	0.0714554	0.0519707	0.0906636	0.5312	1.215
lid	1	1.3084	1.15408	0.0669	0.4065	Neither	0.0279146	0.143971	0.0511459	2.432	1.215
scro	1	1.53302	1.40626	0.2427	0.4068	Neither	0.00665483	0.329808	0.242989	1.593	1.214
Ppt2	1	1.97411	1.5656	0.1147	0.407	Neither	0.0688626	0.488821	0.286264	2.091	1.214
CG7778	1	1.50043	1.46326	0.3589	0.4072	Neither	0.0577355	0.371378	0.278091	1.311	1.214
alphaCOP	1	1.10488	1.18394	0.7214	0.4075	Neither	0.0612381	0.137948	0.108222	0.6916	1.213
CG31195	1	1.0168	1.25116	0.9952	0.4076	Neither	0.239418	0.0769504	0.032694	0.08116	1.213
CG45076	1	1.07913	1.18438	0.8268	0.4083	Neither	0.113008	0.0931149	0.115329	0.52	1.212
CG31140	1	1.03809	1.08365	0.8085	0.4088	Neither	0.0510886	0.0583405	0.0338925	0.5512	1.211
Syt4	1	1.14515	1.2143	0.6396	0.4092	Neither	0.150523	0.01866	0.155121	0.8194	1.21
LysRS	1	0.864622	1.18855	0.6085	0.4094	Neither	0.175969	0.0465439	0.0577293	0.8683	1.209
CG4658	1	1.09736	1.2926	0.8909	0.4102	Neither	0.108575	0.248023	0.121343	0.4019	1.208
Mmp2	1	1.04223	1.22058	0.9618	0.4104	Neither	0.150469	0.0452123	0.15928	0.2312	1.207
Mkrn1	1	1.66105	1.3159	0.0576	0.4107	Neither	0.219682	0.14564	0.182434	2.526	1.207
PGAP1	1	1.07007	1.51385	0.9804	0.4112	Neither	0.163566	0.254945	0.424887	0.1645	1.206
CG4950	1	1.43733	1.33862	0.2558	0.4114	Neither	0.131424	0.296218	0.115489	1.557	1.205
Snap24	1	1.23989	1.34031	0.6206	0.4119	Neither	0.176529	0.165648	0.247181	0.8492	1.205
CG2765	1	1.07786	1.17201	0.8129	0.4136	Neither	0.142017	0.0853043	0.0575303	0.5437	1.201
CG5599	1	0.686904	1.40092	0.5651	0.414	Neither	0.143391	0.145196	0.354414	0.9376	1.201
sli	1	0.996725	1.18597	0.9997	0.4144	Neither	0.0743326	0.0771063	0.156762	0.02113	1.2
CG1090	1	0.964676	1.17681	0.9591	0.4148	Neither	0.093728	0.0940594	0.122382	0.2396	1.199
CG7806	1	1.69639	1.3313	0.0583	0.4153	Neither	0.164455	0.261454	0.138856	2.519	1.198
Fkbp14	1	0.956139	1.39089	0.9869	0.4162	Neither	0.186096	0.0683491	0.34754	0.1343	1.197
CG30089	1	1.13543	1.12201	0.351	0.4164	Neither	0.0845581	0.0824348	0.0407469	1.328	1.196
CG5955	1	0.88202	1.34454	0.8871	0.4165	Neither	0.117882	0.0748218	0.324095	0.4095	1.196
Hrd3	1	1.31457	1.61961	0.7746	0.4166	Neither	0.160328	0.400518	0.465635	0.6069	1.195
CG32103	1	1.31522	1.14972	0.0586	0.4173	Neither	0.0505784	0.087796	0.115327	2.515	1.194
Mi-2	1	1.05926	1.14313	0.8415	0.4175	Neither	0.0523406	0.0890002	0.104372	0.4944	1.194
Gadd45	1	0.976823	2.28001	0.9996	0.4176	Neither	0.377747	0.134411	1.25069	0.02161	1.194
CG31191	1	1.62917	1.4492	0.217	0.4181	Neither	0.271035	0.221545	0.300308	1.671	1.193
Pdxk	1	1.07948	1.36627	0.9525	0.4184	Neither	0.313885	0.181986	0.0995819	0.2587	1.192
CG1598	1	2.2799	2.10671	0.3283	0.419	Neither	0.123211	1.05711	0.402487	1.378	1.191
CG14764	1	1.00711	1.24128	0.9991	0.4196	Neither	0.035126	0.104472	0.222527	0.03507	1.19
Hnf4	1	0.980359	1.06661	0.9153	0.4202	Neither	0.0337269	0.0337656	0.0493033	0.3506	1.189
CalpA	1	1.0862	1.24509	0.8829	0.4208	Neither	0.198968	0.118301	0.10142	0.4178	1.188
sowah	1	0.782759	1.50821	0.834	0.421	Neither	0.18914	0.373247	0.315866	0.5075	1.187
eca	1	2.21228	3.70318	0.8196	0.4213	Neither	0.259788	0.306346	2.76039	0.5323	1.187
CG7139	1	1.53437	1.3893	0.2313	0.422	Neither	0.193193	0.22555	0.271314	1.627	1.185
CASK	1	1.23423	1.10692	0.0517	0.4227	Neither	0.0568913	0.0772452	0.0550285	2.594	1.184
crb	1	1.04126	1.14293	0.9193	0.4229	Neither	0.0871112	0.0386955	0.113044	0.3417	1.184
CG10366	1	1.06437	1.51138	0.9839	0.4235	Neither	0.186197	0.307379	0.389053	0.1488	1.183
Hmt4-20	1	0.921326	1.16953	0.8102	0.4243	Neither	0.063396	0.124779	0.106371	0.5481	1.181
CG5937	1	0.958155	1.22968	0.9669	0.4251	Neither	0.199364	0.106742	0.0757095	0.2149	1.18
Peritrophin-A	1	1.36447	1.64347	0.7377	0.427	Neither	0.507131	0.372312	0.230945	0.6661	1.176
Taf1	1	1.29656	1.37724	0.5738	0.4276	Neither	0.138677	0.264996	0.255367	0.9235	1.175
CG11070	1	1.1527	1.22695	0.6591	0.429	Neither	0.0681505	0.103231	0.202274	0.7888	1.172
DNApol-iota	1	1.08623	1.65535	0.9828	0.4297	Neither	0.203298	0.465654	0.460022	0.1541	1.171
ics	1	0.807752	1.27899	0.6476	0.4297	Neither	0.237122	0.0848454	0.147422	0.8069	1.171
CG14767	1	1.25104	1.11972	0.0645	0.4298	Neither	0.0387125	0.10705	0.0522424	2.455	1.171
Rpt1	1	1.26837	1.19421	0.2343	0.4299	Neither	0.1099	0.130788	0.110001	1.618	1.171
CG7506	1	1.94387	1.80664	0.3328	0.4309	Neither	0.149383	0.297698	0.77697	1.367	1.169
mirr	1	2.21836	1.76571	0.1639	0.4312	Neither	0.425018	0.480441	0.482662	1.859	1.168
CG2767	1	1.00332	1.14395	0.9994	0.4317	Neither	0.111773	0.0285644	0.0974808	0.0269	1.167
CG9044	1	1.40308	1.23038	0.1237	0.4318	Neither	0.124256	0.169168	0.119972	2.042	1.167
Akt1	1	0.96777	1.1744	0.9667	0.4324	Neither	0.112756	0.0806081	0.119805	0.2155	1.166
mRNA-cap	1	1.3874	1.22004	0.1219	0.4329	Neither	0.0734564	0.204975	0.0780377	2.051	1.165
TfIIS	1	1.43963	1.35803	0.3057	0.4332	Neither	0.289413	0.188614	0.149954	1.43	1.164
Dsp1	1	1.12807	1.21056	0.711	0.4335	Neither	0.0719323	0.174702	0.115718	0.708	1.164
Non2	1	2.11653	2.08513	0.4173	0.4352	Neither	0.248528	1.04877	0.386185	1.194	1.161
Sodh-1	1	1.02576	1.24559	0.9892	0.4364	Neither	0.111859	0.0763155	0.221508	0.1215	1.159
barc	1	1.73127	1.50163	0.2113	0.4365	Neither	0.0985155	0.260215	0.451537	1.689	1.158
LanA	1	1.20295	1.10367	0.087	0.4369	Neither	0.0568104	0.0488705	0.0800736	2.266	1.158
CG3036	1	1.33187	1.19259	0.1331	0.437	Neither	0.0481657	0.155733	0.122298	1.994	1.157
CG12194	1	1.05163	1.21031	0.9432	0.4376	Neither	0.1009	0.179004	0.086013	0.2839	1.156
CG7839	1	1.43422	1.45739	0.471	0.4385	Neither	0.235295	0.250022	0.342769	1.096	1.155
hay	1	2.85299	2.30759	0.2288	0.4393	Neither	0.18021	1.18735	0.697517	1.634	1.153
CG8298	1	2.2698	1.68738	0.1078	0.4393	Neither	0.389514	0.548139	0.28423	2.13	1.153
CG9706	1	1.03223	1.33235	0.9909	0.4401	Neither	0.150256	0.261268	0.184521	0.1117	1.152
eIF4G2	1	1.23923	1.1749	0.2492	0.4402	Neither	0.168406	0.0237158	0.0753139	1.575	1.152
prominin-like	1	1.1415	1.13326	0.4025	0.4402	Neither	0.0478394	0.083114	0.104343	1.223	1.152
Eip63E	1	1.35394	1.17331	0.0761	0.4404	Neither	0.11096	0.0812868	0.122822	2.351	1.151
CG6689	1	0.994734	1.35195	0.9998	0.4407	Neither	0.230228	0.188737	0.22745	0.01722	1.151
key	1	3.04702	2.27171	0.1663	0.4418	Neither	0.314408	1.14435	0.656095	1.849	1.149
disco-r	1	0.932618	1.24859	0.9324	0.442	Neither	0.141239	0.106599	0.197497	0.3112	1.148
Herp	1	1.18586	1.65647	0.9266	0.4422	Neither	0.305788	0.237103	0.583731	0.325	1.148
hiw	1	0.92203	1.09641	0.5709	0.4422	Neither	0.0366623	0.0287882	0.0916991	0.9283	1.148
CG1674	1	1.27768	1.28745	0.4647	0.4431	Neither	0.230622	0.181925	0.0898539	1.107	1.146
CG30158	1	1.54745	2.87934	0.9228	0.4434	Neither	0.188212	0.460797	1.94621	0.3338	1.146
CG16972	1	1.48416	1.41521	0.3474	0.4436	Neither	0.178301	0.322502	0.247689	1.335	1.145
Thor	1	0.801131	1.16056	0.3117	0.445	Neither	0.0735354	0.0966183	0.121912	1.416	1.143
trx	1	1.15367	1.0953	0.1679	0.445	Neither	0.0397646	0.0893177	0.029513	1.843	1.143
ogre	1	0.891488	1.12648	0.5391	0.4452	Neither	0.0271953	0.0996428	0.0878475	0.9801	1.142
Syt12	1	1.30584	1.3766	0.5715	0.4456	Neither	0.164674	0.16538	0.329737	0.9272	1.142
ds	1	1.14913	1.20775	0.6404	0.4465	Neither	0.152087	0.134172	0.0932476	0.8182	1.14
Fem-1	1	1.1641	1.3341	0.8037	0.4474	Neither	0.309619	0.178459	0.0387596	0.5591	1.138
beta4GalNAcTA	1	0.89364	1.41567	0.9404	0.4476	Neither	0.323403	0.243622	0.190254	0.2912	1.138
Trf4-1	1	1.13543	1.27825	0.8071	0.4481	Neither	0.155131	0.209307	0.148114	0.5535	1.137
GluClalpha	1	1.3219	1.23759	0.2619	0.4481	Neither	0.154383	0.156775	0.130732	1.54	1.137
CG3164	1	1.14665	1.07961	0.114	0.4481	Neither	0.0140926	0.0567237	0.0627581	2.094	1.137
Top3alpha	1	0.851603	1.54769	0.9337	0.4484	Neither	0.315325	0.291486	0.404869	0.308	1.137
CG3257	1	0.866764	1.41804	0.9101	0.4489	Neither	0.33405	0.133879	0.271457	0.362	1.136
vsg	1	1.08232	1.06682	0.3193	0.4494	Neither	0.0101523	0.0332174	0.0631955	1.398	1.135
CG8370	1	1.13477	1.29763	0.8304	0.4495	Neither	0.248982	0.052481	0.196115	0.5138	1.135
sw	1	1.08425	1.51299	0.975	0.4504	Neither	0.0538758	0.205673	0.512188	0.1861	1.133
Lpt	1	1.86302	2.16221	0.6258	0.4506	Neither	0.466578	0.427376	1.08592	0.841	1.133
su(Hw)	1	2.51998	2.36097	0.3821	0.4514	Neither	0.141177	1.1484	0.912652	1.263	1.131
CG13295	1	1.31005	1.51356	0.727	0.4515	Neither	0.410457	0.178777	0.329964	0.6828	1.131
comm2	1	1.23336	1.40254	0.7446	0.452	Neither	0.345325	0.064688	0.258671	0.6551	1.13
EMC1	1	1.07596	1.1806	0.8523	0.4525	Neither	0.0857526	0.135581	0.112425	0.4749	1.129
CG10585	1	1.21882	1.76094	0.9268	0.4528	Neither	0.176323	0.218428	0.776527	0.3246	1.129
CG6051	1	1.49018	1.23149	0.0717	0.4533	Neither	0.132552	0.150593	0.151503	2.388	1.128
Kul	1	1.0164	1.07552	0.9574	0.454	Neither	0.0752178	0.0212499	0.0251584	0.2446	1.126
inaC	1	1.07269	1.12755	0.7534	0.4545	Neither	0.0805376	0.0573374	0.097432	0.6414	1.125
NKAIN	1	0.986982	1.11929	0.989	0.4551	Neither	0.095144	0.0279418	0.0839508	0.1227	1.124
CaBP1	1	1.20049	1.6308	0.9128	0.4573	Neither	0.196146	0.336411	0.569008	0.3561	1.12
CG7739	1	1.23292	1.3624	0.7036	0.4579	Neither	0.122188	0.180931	0.331008	0.7194	1.119
unc80	1	0.953985	1.08577	0.7791	0.4587	Neither	0.0616926	0.0552752	0.0443835	0.5997	1.118
CG9312	1	3.16843	1.99794	0.0675	0.4595	Neither	0.420549	0.905323	0.449162	2.426	1.117
CG6231	1	1.24175	1.27769	0.5447	0.4602	Neither	0.245666	0.133998	0.121164	0.9709	1.115
PGRP-LB	1	0.515259	1.55598	0.5441	0.4605	Neither	0.42847	0.0244215	0.434555	0.972	1.115
Tbh	1	1.85007	1.82469	0.442	0.4609	Neither	0.170663	0.558148	0.693933	1.148	1.114
CG15771	1	0.965127	1.16818	0.962	0.4616	Neither	0.0875011	0.115342	0.115324	0.2308	1.113
Cadps	1	1.19443	1.18088	0.4166	0.4619	Neither	0.120328	0.0893962	0.131149	1.196	1.112
CG9356	1	1.34932	1.22779	0.2073	0.4634	Neither	0.14451	0.204037	0.0265085	1.702	1.11
fne	1	1.1554	1.20399	0.6231	0.4634	Neither	0.142267	0.0745097	0.157825	0.8453	1.11
Ced-12	1	2.13202	1.52175	0.0698	0.464	Neither	0.350443	0.383678	0.249601	2.405	1.108
ap	1	1.12574	1.25799	0.8151	0.4644	Neither	0.157391	0.165537	0.170768	0.54	1.108
CG30020	1	1.18495	1.37863	0.8149	0.4653	Neither	0.295792	0.202637	0.217334	0.5403	1.106
CkIIbeta	1	1.05989	1.19455	0.9199	0.4655	Neither	0.0997226	0.0894667	0.168733	0.3404	1.106
side-VIII	1	1.22436	1.22863	0.4786	0.4669	Neither	0.207171	0.136311	0.053965	1.083	1.103
CG6357	1	1.79895	1.36667	0.0701	0.4673	Neither	0.338316	0.165072	0.155375	2.403	1.103
sesB	1	1.08806	1.07344	0.3545	0.4683	Neither	0.049855	0.0605053	0.0229725	1.32	1.101
Wnk	1	1.06598	1.07815	0.5708	0.469	Neither	0.05481	0.0543073	0.0402626	0.9285	1.1
aru	1	1.22966	1.29968	0.6251	0.4694	Neither	0.173079	0.247134	0.143235	0.8422	1.099
eIF4G1	1	1.14939	1.10572	0.2576	0.4697	Neither	0.0694109	0.0597011	0.0742896	1.552	1.098
Vsp37A	1	1.12523	1.25891	0.8203	0.4699	Neither	0.0690812	0.186153	0.209688	0.5311	1.098
Stat92E	1	1.12682	1.12378	0.4558	0.4708	Neither	0.0954949	0.0458748	0.0888698	1.123	1.096
Ndfip	1	1.11156	1.31349	0.8968	0.4712	Neither	0.191636	0.232817	0.178516	0.3899	1.096
Patr-1	1	1.21759	1.19466	0.4016	0.4713	Neither	0.192471	0.0921938	0.0426391	1.225	1.095
CG6503	1	1.08741	1.1919	0.8392	0.4722	Neither	0.119172	0.121384	0.131211	0.4983	1.094
Cip4	1	1.34687	1.15643	0.0675	0.4722	Neither	0.124181	0.104548	0.0657187	2.426	1.094
Girdin	1	0.970229	1.31725	0.9923	0.4724	Neither	0.0638051	0.161249	0.310084	0.1026	1.094
CG31689	1	0.908023	1.13744	0.6958	0.4725	Neither	0.0876078	0.0289395	0.12326	0.7316	1.093
Tim23	1	0.806138	1.23418	0.5859	0.4731	Neither	0.223077	0.0357495	0.133803	0.9043	1.092
lncRNA:Hsromega	1	1.04122	1.14633	0.9341	0.4747	Neither	0.0773536	0.0447233	0.138097	0.3069	1.09
Arfip	1	1.17418	1.44462	0.8783	0.4751	Neither	0.403554	0.115821	0.271657	0.4266	1.089
bigmax	1	1.1664	1.64266	0.944	0.4752	Neither	0.147807	0.26888	0.654722	0.2819	1.089
Cyp311a1	1	1.09116	1.56135	0.9774	0.4755	Neither	0.453498	0.244129	0.36594	0.1767	1.088
rols	1	0.867571	1.27224	0.8215	0.476	Neither	0.258272	0.0785021	0.145413	0.529	1.087
Ude	1	2.50233	1.89656	0.1733	0.4761	Neither	0.301502	0.879259	0.395293	1.822	1.087
phtf	1	1.34026	1.23719	0.2566	0.4782	Neither	0.251997	0.0615149	0.0677199	1.554	1.084
Root	1	1.64421	1.3433	0.1256	0.4785	Neither	0.218467	0.191033	0.257983	2.032	1.083
CG9775	1	1.02354	1.1816	0.9857	0.4788	Neither	0.0929858	0.111114	0.1457	0.1403	1.082
CTCF	1	1.39177	1.33428	0.3799	0.4793	Neither	0.12512	0.34568	0.0900938	1.268	1.082
CG34401	1	1.17814	1.15253	0.3828	0.48	Neither	0.0774455	0.102544	0.115704	1.262	1.08
CG12025	1	1.08979	1.09791	0.5331	0.4804	Neither	0.0804009	0.0655826	0.0396443	0.99	1.08
SpdS	1	1.38984	1.24566	0.2038	0.4805	Neither	0.191257	0.077317	0.187421	1.713	1.079
Pka-R1	1	1.09247	1.10541	0.5596	0.4807	Neither	0.0775757	0.0800398	0.0434739	0.9466	1.079
GlcAT-P	1	1.19689	1.13817	0.263	0.4808	Neither	0.0786085	0.122113	0.0593006	1.537	1.079
CG32486	1	1.04282	1.13926	0.9237	0.481	Neither	0.0681854	0.130122	0.058521	0.3316	1.079
CG31974	1	1.71334	1.38545	0.134	0.4828	Neither	0.274306	0.147245	0.309448	1.99	1.075
Pisd	1	0.828599	1.12983	0.3106	0.4834	Neither	0.101643	0.0941292	0.0521143	1.418	1.074
Rab9	1	0.925814	1.22676	0.9154	0.4855	Neither	0.131785	0.178206	0.134748	0.3503	1.071
MED26	1	1.17968	1.18601	0.5068	0.4856	Neither	0.105316	0.146822	0.112403	1.034	1.071
CG4407	1	0.786245	1.42961	0.8195	0.4857	Neither	0.315641	0.163725	0.339488	0.5325	1.07
CG12773	1	1.16071	1.261	0.7421	0.4857	Neither	0.24741	0.105145	0.130136	0.659	1.07
Gtp-bp	1	1.21735	1.2494	0.5681	0.4857	Neither	0.210097	0.12339	0.148589	0.9327	1.07
crq	1	1.20534	1.18117	0.4082	0.4865	Neither	0.141081	0.132995	0.0740813	1.212	1.069
clu	1	0.918851	1.09393	0.5738	0.4865	Neither	0.0757144	0.0601343	0.0472429	0.9235	1.069
CG9676	1	1.047	1.20703	0.9581	0.4867	Neither	0.149823	0.0947556	0.157749	0.2426	1.069
CG5171	1	1.61186	1.33969	0.1495	0.4886	Neither	0.182244	0.316736	0.137805	1.919	1.065
TM9SF4	1	1.01274	1.30515	0.9986	0.4895	Neither	0.312289	0.0446309	0.154688	0.0444	1.064
dlp	1	1.37297	1.27032	0.2903	0.4897	Neither	0.254309	0.0753538	0.163052	1.467	1.063
CSN5	1	1.21134	1.60974	0.9071	0.4899	Neither	0.217253	0.205724	0.635482	0.3685	1.063
CG8042	1	0.729955	1.64752	0.8695	0.49	Neither	0.190383	0.0930108	0.715389	0.4433	1.063
CG15312	1	1.1849	1.39918	0.8427	0.4902	Neither	0.290577	0.259529	0.24478	0.4922	1.063
lncRNA:CR44922	1	1.20426	1.2702	0.6499	0.4902	Neither	0.0822525	0.210796	0.214006	0.8032	1.063
Atf6	1	1.06176	1.12581	0.826	0.4905	Neither	0.0785878	0.0773299	0.0942949	0.5213	1.062
Hsp23	1	1.6849	1.79565	0.5808	0.4917	Neither	0.226102	0.576392	0.679699	0.9123	1.06
Inx2	1	0.974207	1.04582	0.7815	0.4927	Neither	0.018746	0.0409113	0.0280487	0.5957	1.058
swm	1	1.01008	1.15661	0.9966	0.4929	Neither	0.125745	0.0598473	0.116117	0.06807	1.058
CG10623	1	2.05037	1.67377	0.2245	0.4937	Neither	0.452105	0.503497	0.390028	1.647	1.057
PrBP	1	0.669403	1.45747	0.6757	0.4941	Neither	0.433146	0.255141	0.17005	0.763	1.056
mt:ATPase6	1	1.20126	1.16348	0.3643	0.4941	Neither	0.0826649	0.15305	0.0755715	1.3	1.056
Lnpk	1	1.26836	1.61663	0.8612	0.4951	Neither	0.254629	0.459575	0.487198	0.4587	1.054
shf	1	1.01711	1.26409	0.9966	0.4955	Neither	0.108284	0.112351	0.264395	0.06827	1.054
atms	1	0.86772	1.33535	0.8841	0.4957	Neither	0.209345	0.099786	0.31361	0.4154	1.053
14-3-3zeta	1	1.14511	1.09803	0.2551	0.4957	Neither	0.0305021	0.0268475	0.106515	1.559	1.053
Rab26	1	1.28414	1.64087	0.857	0.4963	Neither	0.407576	0.23033	0.580949	0.4664	1.052
fend	1	0.89577	1.3482	0.931	0.4969	Neither	0.287393	0.218022	0.185912	0.3146	1.051
SC35	1	1.06266	2.16358	0.9977	0.4978	Neither	0.0733445	0.32936	1.31524	0.05652	1.05
pan	1	1.18707	1.1445	0.3369	0.4979	Neither	0.108623	0.109968	0.0674901	1.358	1.049
Cdc7	1	0.98215	1.24313	0.9957	0.4983	Neither	0.130549	0.149563	0.203016	0.07699	1.049
RFeSP	1	1.0586	1.24445	0.9551	0.4984	Neither	0.165962	0.17383	0.154266	0.2513	1.048
snRNA:U5:14B	1	4.8919	3.17151	0.1592	0.4988	Neither	0.397615	1.64587	1.89104	1.878	1.048
Nup107	1	1.82303	1.65526	0.3582	0.5005	Neither	0.278005	0.643761	0.313224	1.313	1.045
CG33056	1	1.07778	1.43755	0.9751	0.5005	Neither	0.224963	0.339634	0.311659	0.1857	1.045
CG11594	1	1.16776	1.2174	0.6485	0.5011	Neither	0.179851	0.0550648	0.172278	0.8055	1.044
CG10286	1	1.03633	1.33379	0.9906	0.5012	Neither	0.175642	0.185926	0.296727	0.1136	1.044
cpo	1	1.08529	1.05475	0.2316	0.5012	Neither	0.0327828	0.0266836	0.048384	1.626	1.044
hoe1	1	0.960024	1.08452	0.8423	0.5022	Neither	0.0538893	0.0654335	0.0518273	0.4928	1.042
Doa	1	1.1742	1.09141	0.135	0.5023	Neither	0.0796289	0.0613058	0.0380481	1.985	1.042
beat-IV	1	1.85081	1.626	0.3117	0.5024	Neither	0.269898	0.362283	0.581091	1.416	1.042
CG11241	1	1.8393	1.58258	0.277	0.5024	Neither	0.253997	0.513227	0.376042	1.5	1.042
wun2	1	1.15673	1.42272	0.8986	0.5024	Neither	0.406564	0.158388	0.23812	0.3862	1.042
put	1	0.960048	1.16076	0.9526	0.5032	Neither	0.0626461	0.07893	0.160222	0.2585	1.04
SNF4Agamma	1	1.22063	1.18039	0.3778	0.5035	Neither	0.158442	0.106628	0.0931454	1.272	1.04
PTP-ER	1	1.20723	1.14099	0.2664	0.5035	Neither	0.0582895	0.133757	0.0793426	1.528	1.04
sprt	1	2.04635	1.5436	0.1319	0.5038	Neither	0.111297	0.607971	0.168279	2.001	1.039
Orct	1	1.0604	1.17112	0.9081	0.5046	Neither	0.0564173	0.0759022	0.178432	0.3663	1.038
Nrg	1	1.22574	1.17823	0.3583	0.5056	Neither	0.137879	0.102462	0.121966	1.312	1.036
Thiolase	1	0.783355	1.27611	0.6443	0.5063	Neither	0.0949745	0.106443	0.294008	0.8119	1.035
CG11723	1	1.22757	1.51945	0.8647	0.5079	Neither	0.304715	0.401861	0.354355	0.4522	1.032
CG13185	1	1.26061	1.11823	0.0863	0.5089	Neither	0.0724086	0.11142	0.0456795	2.272	1.03
E(bx)	1	1.0556	1.08685	0.7419	0.5092	Neither	0.0682746	0.0256653	0.0730955	0.6595	1.03
Nos	1	1.03878	1.94896	0.9987	0.5095	Neither	0.376298	0.369567	0.998129	0.04207	1.03
CG16953	1	1.00541	1.18901	0.9993	0.5105	Neither	0.090932	0.168028	0.119228	0.02944	1.028
I-2	1	1.13333	1.17962	0.6762	0.5111	Neither	0.0607275	0.159582	0.129374	0.7623	1.027
CG14777	1	0.655955	1.29934	0.4249	0.5114	Neither	0.265652	0.110189	0.211756	1.18	1.027
CG13784	1	1.06618	1.07817	0.6082	0.5116	Neither	0.0777537	0.043047	0.0284052	0.8687	1.026
tobi	1	1.187	1.17777	0.4808	0.5118	Neither	0.0796674	0.118998	0.156701	1.079	1.026
PVRAP	1	1.29827	1.34982	0.6052	0.5124	Neither	0.313984	0.142453	0.236678	0.8735	1.024
mAChR-A	1	1.41635	1.25955	0.2259	0.5126	Neither	0.093586	0.188572	0.228048	1.643	1.024
Vti1b	1	1.13903	1.47752	0.9377	0.5129	Neither	0.0603228	0.112195	0.556891	0.2981	1.024
H	1	1.12157	1.14007	0.5965	0.5138	Neither	0.125594	0.0851244	0.0716664	0.8873	1.022
rictor	1	1.04944	1.21022	0.959	0.515	Neither	0.117302	0.0958054	0.201889	0.2399	1.02
CG42542	1	1.18558	1.35624	0.8202	0.5153	Neither	0.307774	0.166136	0.246372	0.5313	1.02
Rh7	1	1.27969	1.35028	0.6429	0.5156	Neither	0.179807	0.191197	0.329123	0.8137	1.019
conu	1	1.18332	1.1959	0.5558	0.5162	Neither	0.135411	0.146945	0.124917	0.9528	1.018
CG3838	1	1.21254	1.36006	0.7784	0.5165	Neither	0.0738701	0.303128	0.300591	0.6008	1.018
lncRNA:CR45054	1	2.00867	1.83208	0.3972	0.5167	Neither	0.299947	0.63212	0.716952	1.233	1.017
CG1647	1	1.46629	1.38338	0.3958	0.5175	Neither	0.177182	0.353036	0.239749	1.236	1.016
CG5110	1	1.28766	1.75002	0.897	0.5178	Neither	0.151441	0.345028	0.822405	0.3895	1.015
CG31808	1	1.43849	1.24337	0.1713	0.5179	Neither	0.271554	0.0983167	0.052738	1.829	1.015
bin3	1	0.964093	1.21154	0.9785	0.5182	Neither	0.0983694	0.136049	0.192281	0.1723	1.015
CG15661	1	1.24034	1.25128	0.5455	0.5189	Neither	0.14307	0.0772836	0.256355	0.9696	1.014
CG15706	1	0.823128	1.46191	0.8984	0.5215	Neither	0.348452	0.304514	0.316124	0.3865	1.009
CG13795	1	1.60227	1.34826	0.1946	0.522	Neither	0.197056	0.162894	0.336838	1.744	1.009
snoRNA:Psi18S-1389a	1	4.33822	3.03925	0.2236	0.5222	Neither	0.288923	1.37783	2.03865	1.65	1.008
CG17597	1	1.13666	1.43872	0.9313	0.5229	Neither	0.426256	0.277832	0.160906	0.3137	1.007
PIG-T	1	0.876743	1.28195	0.8712	0.5231	Neither	0.0692136	0.170374	0.289593	0.4401	1.007
per	1	0.759633	1.3092	0.6632	0.5232	Neither	0.189548	0.0442299	0.321956	0.7825	1.007
Fbl6	1	1.11145	1.23745	0.8538	0.5233	Neither	0.242386	0.0535907	0.147941	0.4723	1.006
Pink1	1	1.04916	1.10995	0.866	0.5233	Neither	0.108345	0.0708866	0.0337957	0.45	1.006
CG5028	1	1.09291	1.08511	0.4697	0.5234	Neither	0.0415253	0.0476314	0.0821084	1.098	1.006
CG43347	1	1.03332	1.1386	0.9583	0.5237	Neither	0.061545	0.118011	0.103806	0.2418	1.006
Alk	1	1.07708	1.15387	0.8365	0.5247	Neither	0.0697833	0.14521	0.0962603	0.503	1.004
inaE	1	1.00127	1.16609	NA	0.5249	Neither	0.0807383	0.160906	0.0930605	0.007666	1.004
CG7878	1	1.41027	1.46934	0.6029	0.525	Neither	0.0971683	0.309536	0.472144	0.8771	1.003
Pph13	1	0.821973	1.20844	0.6156	0.525	Neither	0.074217	0.0758729	0.231196	0.8571	1.003
nrv3	1	1.13685	1.09531	0.3012	0.5251	Neither	0.0692074	0.0574681	0.0737984	1.44	1.003
Nmt	1	1.1577	1.62815	0.955	0.5259	Neither	0.124272	0.185135	0.734649	0.2516	1.002
CG6834	1	1.33711	1.29823	0.4506	0.5259	Neither	0.291453	0.197655	0.0940681	1.133	1.002
HisRS	1	0.872399	1.21957	0.7898	0.5261	Neither	0.101013	0.226985	0.101735	0.5821	1.002
mgl	1	1.10676	1.06336	0.2115	0.5261	Neither	0.0520516	0.0333469	0.0466818	1.688	1.002
TTLL5	1	3.10698	2.22386	0.2008	0.5265	Neither	0.218623	1.35745	0.593434	1.723	1.001
PIG-B	1	1.38453	1.42571	0.586	0.5266	Neither	0.179363	0.404185	0.27544	0.904	1.001
kra	1	1.47821	1.22553	0.1092	0.5267	Neither	0.0997835	0.221431	0.131157	2.122	1.001
sick	1	1.07992	1.21068	0.9019	0.5271	Neither	0.097458	0.12586	0.203101	0.3793	0.9999
snRNA:U5:38ABa	1	2.01284	1.68592	0.2872	0.5277	Neither	0.429571	0.415349	0.591804	1.475	0.9989
CG13531	1	1.13405	1.17771	0.6822	0.5283	Neither	0.08672	0.12039	0.159828	0.7528	0.998
CG11796	1	1.15491	1.2106	0.695	0.5293	Neither	0.165464	0.186639	0.0693164	0.7329	0.9964
AIMP3	1	1.58622	1.43548	0.3449	0.5294	Neither	0.330486	0.324671	0.268357	1.341	0.9962
crol	1	1.01795	1.13738	0.9877	0.5294	Neither	0.0471581	0.114782	0.114579	0.1302	0.9961
numb	1	1.14965	1.13923	0.4861	0.5299	Neither	0.118988	0.11406	0.0467855	1.07	0.9953
hid	1	1.34811	1.26341	0.3575	0.5305	Neither	0.242819	0.171294	0.130334	1.314	0.9942
CG8641	1	1.05311	1.32714	0.9811	0.5309	Neither	0.228617	0.19628	0.267913	0.1613	0.9937
RanBP3	1	1.17068	1.29955	0.7996	0.5311	Neither	0.191028	0.147595	0.279548	0.566	0.9933
CG31814	1	1.0573	1.47616	0.9896	0.5314	Neither	0.51684	0.131754	0.245987	0.1195	0.9929
Adgf-A	1	2.14531	1.77383	0.2901	0.5321	Neither	0.182434	0.570779	0.744628	1.468	0.9916
CG8389	1	1.12812	1.25235	0.8363	0.5321	Neither	0.159603	0.219054	0.153834	0.5035	0.9917
CG31030	1	1.12629	1.15596	0.6512	0.5333	Neither	0.134523	0.0800704	0.112919	0.8013	0.9896
lncRNA:CR43051	1	2.24523	1.49703	0.0621	0.5334	Neither	0.403504	0.419089	0.200234	2.479	0.9894
CG18265	1	0.638661	1.21993	0.2319	0.5337	Neither	0.219138	0.0540664	0.152428	1.625	0.989
jdp	1	1.08562	1.12433	0.728	0.5337	Neither	0.0570475	0.0870657	0.113424	0.6811	0.9891
mt:ND5	1	1.204	1.17043	0.4235	0.5343	Neither	0.078233	0.154497	0.12099	1.183	0.9881
emb	1	1.29692	1.16867	0.1963	0.5347	Neither	0.101323	0.152034	0.101928	1.738	0.9874
eIF3k	1	0.981947	1.14283	0.9886	0.5348	Neither	0.0994149	0.0552337	0.135896	0.1248	0.9872
CG5009	1	1.22708	1.16054	0.3203	0.5351	Neither	0.0896206	0.159994	0.0779835	1.396	0.9867
smal	1	0.971802	1.24077	0.9902	0.5353	Neither	0.156461	0.173143	0.186833	0.1155	0.9864
anne	1	1.10912	1.10687	0.5242	0.5367	Neither	0.0845144	0.0487182	0.090408	1.005	0.9841
dop	1	0.999113	1.09044	NA	0.5372	Neither	0.0878106	0.0559893	0.0429481	0.009645	0.9833
Frq1	1	1.11593	1.15049	0.6795	0.5376	Neither	0.0872442	0.0542972	0.156897	0.7571	0.9827
DnaJ-1	1	1.1182	1.12818	0.5856	0.5384	Neither	0.0632993	0.118162	0.0873811	0.9047	0.9811
Hsp68	1	1.01939	1.0999	0.9738	0.5384	Neither	0.0647114	0.0959949	0.0463182	0.1904	0.9812
VhaPPA1-1	1	1.41257	1.21658	0.1619	0.5392	Neither	0.0862018	0.237347	0.0975048	1.867	0.9799
snoRNA:Psi18S-176	1	1.29691	1.46484	0.7631	0.5397	Neither	0.169723	0.269977	0.486213	0.6254	0.9791
GstO2	1	1.33228	1.37067	0.6027	0.5399	Neither	0.120609	0.421345	0.151802	0.8774	0.9788
CG8500	1	0.98372	1.15966	0.9927	0.5402	Neither	0.13358	0.0954545	0.113994	0.09976	0.9783
CG1635	1	1.4303	1.43679	0.5498	0.541	Neither	0.423717	0.170965	0.301673	0.9625	0.9771
CG10948	1	0.621747	1.429	0.6131	0.5414	Neither	0.295083	0.122694	0.432954	0.8609	0.9764
Bruce	1	1.1276	1.09516	0.3603	0.5419	Neither	0.0684768	0.0791274	0.0576308	1.308	0.9756
CG14439	1	1.21125	1.2235	0.5748	0.542	Neither	0.205948	0.177763	0.0688416	0.9219	0.9754
ArfGAP3	1	1.17679	1.19663	0.6035	0.5425	Neither	0.0500733	0.115606	0.212609	0.8761	0.9745
Pp4-19C	1	2.23585	1.50225	0.0709	0.5432	Neither	0.206685	0.579912	0.142651	2.395	0.9734
snRNA:U5:63BC	1	2.2258	1.65672	0.1755	0.5444	Neither	0.34563	0.534701	0.529308	1.813	0.9714
kel	1	0.848055	1.15137	0.5421	0.5444	Neither	0.151572	0.0815521	0.0824436	0.9751	0.9714
Prosbeta2	1	1.66458	1.44212	0.2937	0.545	Neither	0.250678	0.40711	0.287705	1.459	0.9704
CG8300	1	0.970117	1.29313	0.9929	0.5452	Neither	0.162807	0.273122	0.189296	0.0989	0.9702
MICU1	1	1.07724	1.26665	0.9444	0.5453	Neither	0.266581	0.0838446	0.187831	0.2809	0.9699
DPCoAC	1	1.27554	1.2334	0.4443	0.5459	Neither	0.195893	0.176113	0.132799	1.144	0.969
CG7546	1	0.87879	1.14106	0.6316	0.5464	Neither	0.133863	0.0482612	0.107689	0.8319	0.9681
CG7084	1	0.953301	1.12503	0.9103	0.5464	Neither	0.0934377	0.0743377	0.10373	0.3616	0.9681
Rheb	1	1.11302	1.64773	0.9794	0.5465	Neither	0.342377	0.184774	0.721366	0.1689	0.9679
ND-B17	1	0.934562	1.2554	0.9563	0.5466	Neither	0.116566	0.0978539	0.285144	0.248	0.9678
Gcn2	1	0.875189	1.14207	0.6202	0.5469	Neither	0.14847	0.0548437	0.085463	0.8498	0.9674
botv	1	1.17609	1.2234	0.6765	0.5475	Neither	0.218834	0.147374	0.10271	0.7618	0.9664
CG6044	1	1.00259	1.19558	0.9999	0.5476	Neither	0.107346	0.0412104	0.21967	0.01281	0.9661
CG2186	1	1.35564	1.31156	0.4673	0.5477	Neither	0.149368	0.217834	0.293762	1.103	0.9659
Cul2	1	1.20407	1.28698	0.7246	0.548	Neither	0.028591	0.279622	0.231337	0.6866	0.9655
CG31673	1	2.16144	1.64233	0.1943	0.5481	Neither	0.325529	0.570915	0.481905	1.745	0.9653
snoRNA:Or-aca4	1	2.12604	1.44423	0.0653	0.5481	Neither	0.232404	0.284965	0.42714	2.447	0.9653
tau	1	1.23402	1.11582	0.1428	0.5486	Neither	0.0777602	0.114498	0.0497343	1.949	0.9645
UbcE2H	1	1.17395	1.13613	0.3982	0.5493	Neither	0.0790258	0.108664	0.109069	1.231	0.9634
Cyp12c1	1	1.26079	1.50064	0.8375	0.5499	Neither	0.159703	0.508608	0.34896	0.5013	0.9623
Rpt5	1	1.92465	1.51127	0.1959	0.5502	Neither	0.349003	0.460516	0.299657	1.74	0.962
msk	1	1.14033	1.06638	0.1257	0.5506	Neither	0.0386687	0.0690993	0.0297495	2.032	0.9611
Vps8	1	1.86652	1.60603	0.33	0.5509	Neither	0.233908	0.669326	0.306701	1.374	0.9608
lt	1	1.66138	1.41785	0.2695	0.5511	Neither	0.258242	0.460533	0.0718171	1.52	0.9604
ND-ASHI	1	0.937773	1.30696	0.9727	0.5511	Neither	0.153261	0.281668	0.224574	0.1947	0.9603
CG6983	1	1.08524	1.11569	0.7116	0.5516	Neither	0.109952	0.0793081	0.0585396	0.707	0.9595
myo	1	1.0121	1.20919	0.9977	0.5517	Neither	0.204222	0.122813	0.120518	0.05548	0.9594
Cyp6v1	1	1.07257	1.27001	0.9529	0.552	Neither	0.207126	0.151291	0.230448	0.2578	0.9591
Gal	1	1.50928	2.51263	0.9275	0.5521	Neither	0.361474	0.295442	1.87514	0.3228	0.9587
ND-24	1	1.18585	1.22647	0.6609	0.5526	Neither	0.24964	0.113567	0.0927648	0.7862	0.958
grh	1	1.21712	1.15656	0.3512	0.5531	Neither	0.156314	0.115495	0.0486158	1.327	0.9571
CG3107	1	1.15282	1.18785	0.6663	0.5538	Neither	0.136486	0.0953829	0.173766	0.7777	0.9559
Rab3-GEF	1	0.891947	1.12046	0.6155	0.5539	Neither	0.0790643	0.100194	0.0868324	0.8573	0.9557
CG31064	1	1.10956	1.2927	0.9122	0.5546	Neither	0.153869	0.252024	0.231911	0.3574	0.9548
CG42337	1	1.2446	1.33766	0.7218	0.5552	Neither	0.276805	0.224133	0.247261	0.6909	0.9538
wry	1	0.930022	1.16365	0.888	0.5554	Neither	0.0610608	0.147231	0.137109	0.4076	0.9533
Crg-1	1	2.63563	1.63141	0.0633	0.5561	Neither	0.248367	0.753801	0.172675	2.466	0.9521
slif	1	0.915424	1.24716	0.9265	0.5572	Neither	0.176075	0.178666	0.196231	0.3252	0.9505
CG7466	1	1.16342	1.24166	0.753	0.5578	Neither	0.0462756	0.262002	0.162495	0.642	0.9494
pnt	1	1.17574	1.16973	0.5375	0.558	Neither	0.0916391	0.165201	0.11082	0.9827	0.9491
Suox	1	0.997521	1.20419	NA	0.5589	Neither	0.0702925	0.187822	0.171569	0.01151	0.9475
sv	1	0.900316	1.24751	0.901	0.5596	Neither	0.205869	0.107886	0.220242	0.3813	0.9467
CG5773	1	1.01637	1.15383	0.9926	0.5597	Neither	0.111972	0.137264	0.090821	0.1007	0.9464
CG3625	1	1.19203	1.17654	0.5114	0.5614	Neither	0.181267	0.099405	0.0988265	1.026	0.9436
BEAF-32	1	1.8857	1.68117	0.4015	0.5625	Neither	0.252296	0.481317	0.699367	1.225	0.9419
bun	1	1.00982	1.0465	0.9715	0.5626	Neither	0.0448055	0.0168274	0.0369712	0.199	0.9417
CG1358	1	1.22716	1.16547	0.3686	0.5635	Neither	0.0888628	0.19555	0.0179301	1.291	0.9402
Vha36-1	1	1.16336	1.30985	0.8415	0.5653	Neither	0.136837	0.122058	0.360972	0.4942	0.9373
sigmar	1	0.997492	1.14803	0.9998	0.5657	Neither	0.0519921	0.0864393	0.165171	0.01587	0.9368
chp	1	1.03875	1.09788	0.906	0.566	Neither	0.0868435	0.0705602	0.0622803	0.3706	0.9361
CG1688	1	0.409289	2.02305	0.8151	0.5665	Neither	0.219765	0.0947463	1.31811	0.54	0.9353
CG42541	1	1.40274	1.30672	0.3999	0.5668	Neither	0.240849	0.311897	0.0782836	1.228	0.935
hook	1	1.11187	1.20802	0.8367	0.5668	Neither	0.141979	0.0510412	0.226924	0.5028	0.9349
Hel89B	1	1.07097	1.13478	0.8428	0.5671	Neither	0.156235	0.0626337	0.0536693	0.492	0.9344
Nph	1	0.675166	2.53769	0.972	0.5674	Neither	0.23102	0.257083	1.98679	0.1973	0.9339
CG13506	1	1.39099	1.1964	0.1638	0.5674	Neither	0.137413	0.169213	0.137165	1.859	0.934
Itp-r83A	1	1.02632	1.05746	0.8777	0.5675	Neither	0.0616881	0.0339167	0.0269086	0.4277	0.9338
toy	1	1.05006	1.17583	0.95	0.5676	Neither	0.192814	0.105445	0.0701364	0.2658	0.9335
l(3)76BDm	1	1.44988	1.21813	0.1486	0.5683	Neither	0.186041	0.173508	0.131788	1.923	0.9324
CG4662	1	1.18568	1.37519	0.8602	0.5693	Neither	0.240143	0.339897	0.265456	0.4607	0.9309
chn	1	0.88929	1.11808	0.6062	0.5698	Neither	0.0867001	0.0682491	0.109587	0.8719	0.93
Dlc90F	1	1.25603	1.52819	0.8657	0.5703	Neither	0.245821	0.218632	0.613533	0.4504	0.9292
CG2862	1	1.36193	1.28977	0.437	0.5719	Neither	0.181543	0.306214	0.141258	1.157	0.9266
Drsl5	1	1.25257	1.17929	0.3616	0.5719	Neither	0.0803533	0.205587	0.0861871	1.305	0.9266
CG5498	1	1.41888	1.36705	0.4946	0.5733	Neither	0.289322	0.316344	0.229682	1.055	0.9243
CG16926	1	1.05573	1.41079	0.9886	0.5738	Neither	0.345092	0.297016	0.299166	0.1253	0.9235
Mcr	1	1.19407	1.11236	0.2431	0.5748	Neither	0.0388909	0.0697867	0.126098	1.592	0.9219
Clc	1	0.940912	1.20097	0.9481	0.5749	Neither	0.235694	0.104743	0.0691437	0.271	0.9218
CG16898	1	0.997443	1.40585	NA	0.5753	Neither	0.388737	0.338585	0.159351	0.005803	0.9212
PpV	1	1.59496	1.46234	0.4224	0.5755	Neither	0.268567	0.459219	0.308615	1.185	0.9207
Ca-beta	1	1.10745	1.17783	0.8055	0.5757	Neither	0.096164	0.138272	0.166176	0.5562	0.9205
CG2061	1	0.92689	1.40945	0.9805	0.5762	Neither	0.230875	0.237393	0.433037	0.1643	0.9199
CG32695	1	3.70723	2.12986	0.0969	0.5776	Neither	0.433224	1.39064	0.391696	2.198	0.9174
Rich	1	1.15313	1.17987	0.6643	0.5779	Neither	0.17211	0.142505	0.0881353	0.7808	0.9171
CG10365	1	1.05181	1.13585	0.9157	0.578	Neither	0.135817	0.0800132	0.0898897	0.3497	0.9169
nemy	1	1.36989	1.16376	0.1186	0.5785	Neither	0.0935688	0.171845	0.0982323	2.069	0.9161
glec	1	1.23583	1.29373	0.6934	0.5786	Neither	0.324296	0.219999	0.0261237	0.7354	0.916
Snp	1	1.14428	1.18428	0.7052	0.5787	Neither	0.135526	0.0488226	0.200009	0.7169	0.9157
Sps2	1	0.77495	1.21974	0.5654	0.5791	Neither	0.186944	0.160902	0.16019	0.9372	0.9151
CG5270	1	0.791626	1.09057	0.1121	0.5791	Neither	0.0619403	0.08694	0.0574326	2.105	0.9151
Syx1A	1	1.05027	1.12582	0.9085	0.5792	Neither	0.099676	0.0447093	0.128212	0.3655	0.9148
GckIII	1	1.0419	1.31921	0.9895	0.5799	Neither	0.288983	0.253678	0.187721	0.1199	0.9136
roh	1	1.29522	1.13152	0.122	0.5799	Neither	0.153216	0.0562057	0.0666839	2.051	0.9137
unc-45	1	2.11856	1.96565	0.4932	0.5804	Neither	0.234693	0.940275	0.859809	1.057	0.9129
CG2794	1	0.794238	1.42199	0.8686	0.5806	Neither	0.184636	0.256354	0.469943	0.445	0.9127
jus	1	1.3682	1.13502	0.0611	0.5807	Neither	0.0633349	0.120293	0.119823	2.488	0.9125
ftz-f1	1	0.994042	1.1253	0.9986	0.581	Neither	0.0851274	0.0662768	0.129151	0.04336	0.9119
wgn	1	1.26937	1.23567	0.5021	0.5811	Neither	0.191415	0.128545	0.216871	1.042	0.9119
CG4882	1	1.4489	1.59068	0.7208	0.5814	Neither	0.356371	0.544088	0.45502	0.6926	0.9114
CG14480	1	2.2555	2.18985	0.5527	0.5837	Neither	0.36284	1.41471	0.666481	0.9578	0.9077
Trap1	1	1.36296	1.25102	0.3583	0.5838	Neither	0.0819153	0.233288	0.23162	1.312	0.9075
wit	1	1.16217	1.17841	0.6362	0.584	Neither	0.177505	0.0450938	0.156401	0.8247	0.9073
orb	1	1.98428	1.35278	0.0574	0.5848	Neither	0.186864	0.406112	0.166246	2.527	0.9059
Ppa	1	1.09845	1.18825	0.8538	0.5864	Neither	0.124206	0.218474	0.044541	0.4724	0.9033
CG3009	1	0.974288	1.23453	0.9929	0.5868	Neither	0.222005	0.158815	0.16355	0.09896	0.9027
stas	1	1.27001	1.16128	0.2732	0.5872	Neither	0.0608738	0.102318	0.183759	1.51	0.9021
Unc-115a	1	1.07401	1.22005	0.9358	0.5885	Neither	0.249991	0.159116	0.0429289	0.3027	0.9001
Cngl	1	1.06957	1.11591	0.8152	0.5891	Neither	0.0753714	0.119726	0.0700726	0.5397	0.8992
CG42369	1	1.07932	1.0621	0.442	0.5892	Neither	0.0124871	0.0396982	0.0736773	1.148	0.8988
CG30151	1	1.056	1.26637	0.9743	0.5897	Neither	0.102973	0.10159	0.333201	0.1888	0.8981
CG7990	1	1.38219	1.14356	0.0715	0.5898	Neither	0.060658	0.153573	0.105279	2.39	0.8979
CG32485	1	1.69719	2.457	0.8772	0.591	Neither	0.431639	1.02314	1.65334	0.4287	0.896
alph	1	1.45464	1.29319	0.3238	0.5917	Neither	0.348184	0.101027	0.171824	1.388	0.895
CG8974	1	1.04729	1.12197	0.9169	0.5918	Neither	0.0525476	0.0989328	0.123774	0.347	0.8948
Glut1	1	1.07807	1.09975	0.7159	0.5919	Neither	0.0805563	0.108648	0.0187933	0.7002	0.8947
msi	1	1.18282	1.12592	0.3648	0.592	Neither	0.0622207	0.144849	0.0698388	1.299	0.8944
CG7829	1	1.15722	1.22764	0.7683	0.5925	Neither	0.234495	0.183531	0.0931454	0.6171	0.8936
bip2	1	1.17871	1.16352	0.542	0.5932	Neither	0.0700787	0.17189	0.126092	0.9754	0.8925
CG9646	1	1.21443	1.15172	0.3843	0.5945	Neither	0.0662834	0.162758	0.112483	1.259	0.8906
CG43340	1	1.03431	1.03391	0.5881	0.5947	Neither	0.0349151	0.0229763	0.0207424	0.9007	0.8901
ppl	1	1.13976	1.2453	0.8342	0.5948	Neither	0.0748972	0.261442	0.19996	0.5071	0.89
CHES-1-like	1	1.07757	1.05639	0.4018	0.5948	Neither	0.0319606	0.039724	0.0585125	1.224	0.8899
mask	1	1.05133	1.0572	0.6534	0.5954	Neither	0.0466333	0.0554614	0.0309727	0.7977	0.8889
yellow-d	1	1.20183	1.24591	0.6973	0.5957	Neither	0.214875	0.201115	0.168116	0.7293	0.8886
Sos	1	0.997215	1.12855	0.9997	0.5959	Neither	0.059046	0.0395346	0.162394	0.01924	0.8882
CG34370	1	1.10514	1.21393	0.8735	0.5969	Neither	0.111012	0.181334	0.205253	0.4357	0.8866
CG4901	1	1.99074	1.58942	0.282	0.5979	Neither	0.416131	0.631302	0.305751	1.488	0.8851
Calr	1	0.954426	1.10773	0.9043	0.5982	Neither	0.0978816	0.0425761	0.104172	0.3742	0.8846
Unr	1	1.10704	1.06486	0.2933	0.5982	Neither	0.0687844	0.0474204	0.032944	1.46	0.8845
NKCC	1	0.892816	1.09532	0.5304	0.5983	Neither	0.0907842	0.065947	0.0695298	0.9945	0.8844
CG8245	1	1.07666	1.35456	0.9737	0.5989	Neither	0.0633739	0.177536	0.453954	0.191	0.8835
mbl	1	1.02737	1.04767	0.8342	0.599	Neither	0.0226005	0.0588261	0.0199349	0.5072	0.8832
CG18343	1	1.0339	1.3493	0.9946	0.5996	Neither	0.344949	0.109273	0.322722	0.08564	0.8823
Jheh3	1	0.782425	1.21195	0.5851	0.5998	Neither	0.226115	0.0985585	0.160525	0.9055	0.882
pix	1	1.06198	1.05865	0.5691	0.6004	Neither	0.0539643	0.0135057	0.0595917	0.9312	0.8811
CG10026	1	1.96938	1.75309	0.4502	0.6008	Neither	0.106638	0.774924	0.696843	1.133	0.8804
CG15431	1	1.25181	1.25671	0.612	0.6015	Neither	0.14333	0.237429	0.225643	0.8626	0.8794
CG14459	1	0.641776	1.48317	0.7469	0.6018	Neither	0.271675	0.0665532	0.61253	0.6515	0.8788
CG32694	1	1.50071	1.1813	0.0674	0.6018	Neither	0.152831	0.0801082	0.184525	2.427	0.8789
qless	1	1.3082	1.18422	0.289	0.6019	Neither	0.134443	0.128586	0.176935	1.47	0.8788
kek4	1	2.15105	1.55395	0.1733	0.6031	Neither	0.468407	0.593512	0.164375	1.822	0.8768
sei	1	0.802549	1.29466	0.7868	0.6035	Neither	0.0906118	0.282507	0.285742	0.5871	0.8761
Fatp	1	0.915116	1.09028	0.6371	0.6037	Neither	0.0625925	0.0554173	0.0946147	0.8234	0.8757
lolal	1	1.57993	1.34937	0.2965	0.6045	Neither	0.115497	0.438775	0.18309	1.452	0.8745
Sin3A	1	1.08991	1.0806	0.5419	0.6045	Neither	0.0532754	0.080078	0.059049	0.9757	0.8746
CG32523	1	0.920927	1.31579	0.9656	0.6046	Neither	0.173889	0.0852369	0.397676	0.2189	0.8744
PAPLA1	1	0.941828	1.08767	0.7914	0.6054	Neither	0.0712104	0.0668166	0.0747318	0.5794	0.8732
CG10137	1	0.730753	1.41986	0.8039	0.6065	Neither	0.229459	0.0827426	0.537328	0.5588	0.8714
Hmt-1	1	1.20848	1.16878	0.4825	0.6068	Neither	0.137761	0.105848	0.161686	1.076	0.871
snoRNA:Psi28S-2442b	1	4.31046	2.37509	0.1142	0.6078	Neither	0.170506	1.79139	0.716882	2.093	0.8694
CG6154	1	0.54605	1.32512	0.4072	0.6079	Neither	0.340539	0.211586	0.221685	1.214	0.8692
eco	1	1.25845	1.18384	0.4033	0.6083	Neither	0.0602341	0.169883	0.186315	1.221	0.8685
CG1275	1	1.01542	1.15174	0.9943	0.6085	Neither	0.141324	0.0933503	0.130901	0.0882	0.8682
tefu	1	1.16467	1.24541	0.7899	0.6091	Neither	0.217319	0.0888539	0.254869	0.582	0.8674
alrm	1	1.02319	1.16791	0.9896	0.6092	Neither	0.132619	0.141811	0.136234	0.1197	0.867
RpL7	1	1.12713	1.04961	0.0934	0.6094	Neither	0.0247387	0.00909714	0.0649475	2.221	0.8669
Fpgs	1	1.30549	1.47775	0.8068	0.6097	Neither	0.298863	0.463663	0.389723	0.554	0.8663
Hsp26	1	0.997101	1.0915	0.9994	0.6097	Neither	0.04452	0.058742	0.106296	0.02745	0.8664
CG7607	1	1.06167	1.16753	0.9293	0.6102	Neither	0.188872	0.065407	0.127441	0.3186	0.8655
GlyRS	1	0.924639	1.21411	0.9352	0.6109	Neither	0.128007	0.217965	0.167737	0.3042	0.8644
pygo	1	1.45571	1.17314	0.0861	0.6114	Neither	0.222838	0.02728	0.0994661	2.273	0.8636
CG13077	1	0.890506	1.16294	0.7914	0.6123	Neither	0.180636	0.0357475	0.140203	0.5794	0.8622
Psa	1	1.10353	1.06597	0.3398	0.6126	Neither	0.0362948	0.061068	0.061205	1.352	0.8617
CG10799	1	1.68125	1.51175	0.4428	0.6128	Neither	0.509847	0.429217	0.291615	1.147	0.8616
Strip	1	1.40045	1.1543	0.0913	0.6128	Neither	0.125685	0.153036	0.0943008	2.236	0.8616
dmt	1	2.68273	1.75625	0.1501	0.6129	Neither	0.520953	0.887519	0.312167	1.916	0.8613
dmpd	1	0.888515	1.18269	0.8238	0.6134	Neither	0.0807204	0.152309	0.194671	0.5251	0.8605
CG14275	1	0.725615	1.28887	0.6411	0.6136	Neither	0.187688	0.137454	0.339216	0.817	0.8601
lncRNA:noe	1	1.01126	1.06845	0.9855	0.614	Neither	0.0268377	0.0470706	0.0810994	0.1414	0.8596
CG5885	1	1.25789	1.20204	0.4705	0.6141	Neither	0.157498	0.0617207	0.232963	1.097	0.8595
CG8008	1	1.12354	1.30302	0.9154	0.6142	Neither	0.228293	0.231828	0.284076	0.3503	0.8592
Adk2	1	1.23684	1.16604	0.4013	0.6144	Neither	0.161647	0.124763	0.119794	1.225	0.859
CG11961	1	0.99905	1.28138	NA	0.6173	Neither	0.198494	0.205886	0.284433	0.002885	0.8544
Su(dx)	1	1.06912	1.16138	0.9083	0.6174	Neither	0.0892972	0.182507	0.110679	0.3659	0.8542
CG7456	1	1.44135	1.38986	0.5475	0.6178	Neither	0.255488	0.441697	0.229215	0.9663	0.8536
plum	1	1.01493	1.211	0.9973	0.6178	Neither	0.0676597	0.106807	0.275068	0.06039	0.8536
CG5853	1	1.12376	1.17791	0.7833	0.6187	Neither	0.223487	0.0830999	0.0923383	0.5928	0.8522
OtopLa	1	1.05839	1.09744	0.8324	0.6191	Neither	0.105431	0.0837487	0.038836	0.5103	0.8516
CG5694	1	1.14775	1.27318	0.8603	0.6194	Neither	0.255272	0.250339	0.163453	0.4603	0.8511
CG14277	1	1.10329	1.46785	0.9745	0.6198	Neither	0.15662	0.198345	0.624669	0.1877	0.8503
Gmap	1	1.23115	1.28405	0.7213	0.62	Neither	0.358537	0.160711	0.114292	0.6919	0.8502
CG6175	1	1.21913	1.15406	0.4094	0.62	Neither	0.184063	0.0917362	0.0834338	1.209	0.8502
Est-Q	1	0.763839	1.19144	0.4984	0.6201	Neither	0.118645	0.140646	0.205545	1.048	0.8499
Mlc-c	1	0.888202	1.12035	0.6587	0.6201	Neither	0.0496165	0.0823788	0.144314	0.7896	0.85
unc-104	1	1.13523	1.10463	0.4713	0.6216	Neither	0.0745964	0.0405865	0.125081	1.096	0.8476
blow	1	1.20066	1.13492	0.3838	0.622	Neither	0.0858718	0.151505	0.0879494	1.26	0.847
cno	1	1.04	1.10356	0.9256	0.622	Neither	0.0425232	0.112845	0.0887735	0.3272	0.847
Gcn5	1	0.952992	1.43914	0.994	0.6222	Neither	0.176451	0.0705831	0.606053	0.09065	0.8468
Vps11	1	1.5732	1.3124	0.2571	0.6223	Neither	0.366953	0.13502	0.226736	1.553	0.8465
CG6766	1	1.57069	1.28167	0.2039	0.623	Neither	0.215283	0.33499	0.0892918	1.713	0.8453
Su(z)2	1	1.07883	1.17223	0.8984	0.6233	Neither	0.202801	0.132943	0.0594198	0.3867	0.8449
Mipp1	1	0.91104	1.14132	0.8198	0.6233	Neither	0.0873925	0.125157	0.136586	0.5319	0.845
lncRNA:CR42549	1	1.42866	1.64901	0.8048	0.6241	Neither	0.264484	0.512341	0.745104	0.5572	0.8437
CG12093	1	1.45175	1.38974	0.5413	0.6249	Neither	0.348458	0.332695	0.298093	0.9766	0.8425
CG4968	1	1.67624	1.34764	0.2276	0.6252	Neither	0.227186	0.42894	0.141939	1.638	0.8419
CG7120	1	0.996858	1.20539	0.9999	0.6255	Neither	0.123794	0.122535	0.242909	0.01287	0.8416
CG5902	1	1.25077	1.28741	0.6945	0.6258	Neither	0.354911	0.194187	0.107517	0.7337	0.8409
CG10866	1	2.38496	1.4609	0.0576	0.6261	Neither	0.246511	0.55481	0.287089	2.526	0.8405
CadN2	1	1.04736	1.1965	0.9705	0.6263	Neither	0.113404	0.128153	0.229709	0.2025	0.8402
CG14989	1	1.14622	1.15972	0.6725	0.6272	Neither	0.102391	0.14235	0.153724	0.768	0.8389
Npc2g	1	0.759923	1.27613	0.6975	0.6273	Neither	0.062355	0.0775147	0.39082	0.7291	0.8386
CIA30	1	1.18841	1.33593	0.8552	0.6279	Neither	0.0928149	0.0950015	0.472858	0.4698	0.8377
CG4452	1	2.08621	1.58685	0.2583	0.628	Neither	0.086837	0.74696	0.41367	1.55	0.8374
Adf1	1	1.13273	1.33269	0.9227	0.6284	Neither	0.0779251	0.398588	0.268542	0.3339	0.8369
CG15414	1	0.975938	1.30636	0.9968	0.6285	Neither	0.388011	0.152622	0.165138	0.06571	0.8367
Ge-1	1	1.33883	1.27416	0.507	0.6286	Neither	0.261951	0.136352	0.271848	1.034	0.8365
CG3301	1	0.85453	1.13655	0.5946	0.6291	Neither	0.149038	0.0913755	0.0973643	0.8904	0.8358
Sfxn1-3	1	1.17983	1.08679	0.1984	0.6292	Neither	0.0805673	0.0766675	0.0617769	1.731	0.8356
CG42458	1	0.845716	1.49687	0.9523	0.6295	Neither	0.262856	0.195568	0.650857	0.2593	0.8351
Cen	1	1.22153	1.2073	0.5937	0.63	Neither	0.156601	0.140098	0.22005	0.8917	0.8345
Sf3b3	1	0.848481	1.16392	0.6705	0.6301	Neither	0.138283	0.104001	0.167285	0.7711	0.8342
RhoGAP100F	1	0.991822	1.16329	0.9987	0.6305	Neither	0.137988	0.0640602	0.185484	0.04175	0.8336
CG9855	1	2.54846	1.77812	0.2212	0.631	Neither	0.134368	1.12165	0.182591	1.657	0.8328
ASPP	1	1.11776	1.16202	0.7756	0.631	Neither	0.0594308	0.211885	0.0912902	0.6053	0.8329
mrt	1	1.12831	1.17996	0.7828	0.6312	Neither	0.139268	0.075892	0.211976	0.5936	0.8325
Csk	1	0.994329	1.12325	0.9989	0.6316	Neither	0.139851	0.0390889	0.108765	0.03828	0.832
Syt1	1	1.08159	1.08436	0.649	0.6316	Neither	0.086023	0.0340265	0.0828552	0.8046	0.832
Usp20-33	1	0.593682	1.2018	0.2159	0.6319	Neither	0.202863	0.067887	0.206396	1.674	0.8315
Dro	1	0.623473	1.40041	0.6638	0.6321	Neither	0.311882	0.0568952	0.497628	0.7816	0.8311
Top2	1	1.44199	1.27854	0.3562	0.633	Neither	0.185247	0.363887	0.0483117	1.317	0.8297
spn-F	1	0.73736	1.39942	0.8123	0.6339	Neither	0.251816	0.138459	0.515924	0.5447	0.8283
Ho	1	1.91733	1.62237	0.4041	0.6344	Neither	0.562582	0.535156	0.495511	1.22	0.8275
Nup153	1	1.09832	1.10921	0.6873	0.6345	Neither	0.0756383	0.0656173	0.126929	0.7448	0.8273
CG15080	1	1.11129	1.32909	0.9449	0.6351	Neither	0.450048	0.149183	0.114379	0.2795	0.8264
sba	1	0.934318	1.12266	0.87	0.6352	Neither	0.097283	0.127074	0.0862983	0.4424	0.8262
CG16979	1	1.07976	1.21521	0.9345	0.6356	Neither	0.21483	0.112363	0.207733	0.306	0.8256
Dhpr	1	1.24244	1.21357	0.5658	0.636	Neither	0.169328	0.144476	0.22574	0.9366	0.8251
Prp19	1	0.567461	1.55097	0.7495	0.6362	Neither	0.0777525	0.237419	0.779139	0.6474	0.8247
Tsp	1	1.01006	1.15198	0.9978	0.6364	Neither	0.0989158	0.102533	0.175217	0.05458	0.8242
Fas1	1	1.02012	1.0416	0.8926	0.6366	Neither	0.027674	0.0241856	0.0497219	0.3985	0.824
Uev1A	1	1.24081	1.1441	0.3286	0.6367	Neither	0.146133	0.0872016	0.130091	1.377	0.8239
snoRNA:Psi18S-920	1	4.29361	2.04483	0.0514	0.6368	Neither	0.529928	1.40017	0.415258	2.596	0.8237
stum	1	1.41064	1.51433	0.743	0.6368	Neither	0.223364	0.588159	0.434627	0.6577	0.8238
mod(mdg4)	1	1.03049	1.11483	0.9658	0.6368	Neither	0.101833	0.120178	0.0658915	0.2187	0.8237
CG33120	1	1.23698	1.19782	0.5355	0.6372	Neither	0.239595	0.112281	0.129012	0.986	0.823
ArfGAP1	1	1.10431	1.18531	0.8588	0.6374	Neither	0.0789075	0.169581	0.202728	0.4632	0.8228
CG4538	1	0.91113	1.07129	0.5118	0.6374	Neither	0.0460773	0.0909152	0.0295615	1.026	0.8227
snoRNA:Psi28S-2996	1	3.1553	2.07945	0.2264	0.6379	Neither	0.486609	1.47774	0.407001	1.641	0.8221
Elal	1	1.11561	1.09982	0.557	0.6385	Neither	0.0304672	0.0306794	0.142501	0.9508	0.821
Mondo	1	0.931304	1.10995	0.831	0.6389	Neither	0.0854961	0.0381318	0.13479	0.5127	0.8205
AlaRS-m	1	1.07812	1.31819	0.9709	0.6397	Neither	0.255969	0.230413	0.328146	0.2011	0.8192
gpp	1	1.01283	1.10788	0.9931	0.64	Neither	0.110654	0.0854689	0.0805727	0.09738	0.8187
Nplp1	1	0.810715	1.26395	0.7869	0.6402	Neither	0.206327	0.27509	0.194497	0.5868	0.8183
CG7222	1	1.31512	1.1196	0.1035	0.6402	Neither	0.0618423	0.155384	0.0637285	2.156	0.8185
lectin-28C	1	1.17286	1.55498	0.954	0.6408	Neither	0.399964	0.525524	0.505134	0.2546	0.8175
Shal	1	0.934312	1.21614	0.9561	0.6411	Neither	0.194508	0.107259	0.235843	0.2483	0.8171
fwd	1	1.08419	1.07982	0.6129	0.6413	Neither	0.0460346	0.0961815	0.0544248	0.8613	0.8166
Taf6	1	1.25308	1.18234	0.4507	0.6418	Neither	0.233621	0.106566	0.0947846	1.132	0.8159
eRF1	1	1.13078	1.11077	0.5509	0.6429	Neither	0.0665673	0.105	0.111063	0.9608	0.8138
CG14419	1	1.05052	1.22481	0.9759	0.643	Neither	0.290574	0.15733	0.0731139	0.1828	0.8136
NtR	1	0.835798	1.15503	0.6133	0.6438	Neither	0.154316	0.032541	0.172406	0.8607	0.8126
CG30116	1	1.15611	1.12975	0.5413	0.6445	Neither	0.0490108	0.137092	0.130907	0.9766	0.8116
Gapdh2	1	1.05164	1.1192	0.9149	0.6447	Neither	0.105461	0.0911664	0.11384	0.3514	0.8112
l(2)gl	1	1.11956	1.17711	0.8107	0.645	Neither	0.13518	0.189762	0.131433	0.5474	0.8109
Stim	1	1.01916	1.12347	0.9885	0.6451	Neither	0.13527	0.0512721	0.117744	0.1258	0.8107
Cyp6t1	1	0.789044	1.16093	0.4902	0.6452	Neither	0.156207	0.12337	0.139659	1.063	0.8106
cdi	1	1.26855	1.08481	0.0543	0.646	Neither	0.0527528	0.103873	0.0538388	2.563	0.8093
tnc	1	1.30281	1.15839	0.2594	0.6461	Neither	0.12966	0.127969	0.155837	1.547	0.8092
E(var)3-9	1	2.39205	1.46154	0.0662	0.6465	Neither	0.144163	0.646689	0.222912	2.439	0.8086
DopEcR	1	1.34518	1.13993	0.1333	0.6467	Neither	0.179853	0.107058	0.0340272	1.994	0.8082
vih	1	1.22123	1.26339	0.7296	0.6468	Neither	0.308952	0.220357	0.12395	0.6787	0.8081
Rpt2	1	1.13626	1.17559	0.7631	0.6482	Neither	0.206173	0.0783762	0.1502	0.6254	0.8059
l(3)72Dp	1	0.897866	1.24761	0.9236	0.649	Neither	0.269464	0.0864224	0.248868	0.3319	0.8047
klu	1	2.14814	1.67667	0.3349	0.6499	Neither	0.302338	0.917447	0.362427	1.363	0.8033
LTV1	1	1.08167	1.0457	0.3039	0.6504	Neither	0.0490923	0.0308208	0.0387871	1.434	0.8026
dob	1	1.40152	1.32294	0.5288	0.6507	Neither	0.235581	0.352476	0.251908	0.9972	0.802
CG1354	1	0.994457	1.13502	0.9992	0.6508	Neither	0.144435	0.0939488	0.113352	0.03292	0.8018
CG33230	1	1.43494	1.32263	0.4801	0.6512	Neither	0.384768	0.294681	0.0913334	1.08	0.8012
bt	1	1.24995	1.08063	0.0617	0.6514	Neither	0.0536211	0.0914892	0.0628912	2.483	0.8009
Mppe	1	1.11431	1.10487	0.6056	0.6515	Neither	0.0845201	0.0791831	0.110944	0.8729	0.8008
Plap	1	0.940389	1.46586	0.9924	0.6523	Neither	0.122224	0.175614	0.680771	0.1023	0.7995
CG12851	1	1.44431	1.22387	0.245	0.6523	Neither	0.276866	0.112743	0.168054	1.587	0.7995
Neurl4	1	1.12797	1.13342	0.6739	0.6529	Neither	0.0846697	0.0767785	0.169761	0.7658	0.7985
Rrp6	1	1.34162	1.52757	0.8287	0.6533	Neither	0.258596	0.420358	0.641944	0.5167	0.798
CG30069	1	1.00455	1.09512	0.9989	0.6534	Neither	0.0517415	0.120515	0.064224	0.03817	0.7978
alpha-Est2	1	1.86746	1.31122	0.0932	0.6535	Neither	0.139801	0.429902	0.155095	2.223	0.7976
Not1	1	1.11075	1.05353	0.2237	0.6537	Neither	0.0642984	0.0476505	0.0188479	1.65	0.7975
Jafrac1	1	1.10588	1.0644	0.3595	0.6541	Neither	0.0620403	0.0529252	0.0561602	1.31	0.7966
snRNA:U4atac	1	1.5622	1.31273	0.3048	0.6543	Neither	0.342161	0.299046	0.157384	1.432	0.7965
Cyp9h1	1	1.60471	1.32746	0.2891	0.6544	Neither	0.27999	0.377268	0.18177	1.47	0.7961
Mur2B	1	1.10218	1.18718	0.8746	0.6555	Neither	0.192582	0.143857	0.159551	0.4337	0.7946
NK7.1	1	1.32107	1.13364	0.1523	0.656	Neither	0.151646	0.0112371	0.139305	1.907	0.7937
Jwa	1	0.916601	1.1893	0.916	0.657	Neither	0.148516	0.169844	0.186401	0.349	0.7922
Nrx-IV	1	1.16519	1.10306	0.3792	0.6572	Neither	0.0361599	0.139552	0.0680549	1.269	0.7918
nito	1	1.10232	1.29184	0.9457	0.6573	Neither	0.344926	0.277387	0.0892371	0.2775	0.7916
heix	1	1.8755	1.34072	0.1253	0.6575	Neither	0.297252	0.399915	0.172497	2.034	0.7914
CG7099	1	1.20677	1.29154	0.8024	0.6576	Neither	0.211903	0.212189	0.337205	0.5612	0.7913
CG2145	1	0.934959	1.0687	0.6846	0.6576	Neither	0.0213561	0.0383113	0.0968678	0.7491	0.7913
CG15628	1	1.31602	1.20833	0.4153	0.6584	Neither	0.261437	0.058343	0.180516	1.198	0.7899
CG5087	1	1.07794	1.15036	0.8872	0.6587	Neither	0.0678968	0.180699	0.130946	0.4092	0.7895
bark	1	1.17991	1.10919	0.3651	0.6599	Neither	0.114048	0.0965971	0.0805008	1.298	0.7877
SA	1	1.62704	1.25523	0.1466	0.6606	Neither	0.241038	0.196943	0.247153	1.932	0.7865
CG8858	1	1.16109	1.27159	0.857	0.6607	Neither	0.237806	0.0774011	0.341199	0.4664	0.7863
IM4	1	0.851546	1.07252	0.2378	0.6613	Neither	0.0675442	0.0444296	0.0790871	1.608	0.7854
Sf3b6	1	1.00484	1.29581	0.9999	0.6616	Neither	0.20984	0.34526	0.223056	0.01283	0.785
gish	1	1.18694	1.10402	0.3138	0.6616	Neither	0.092479	0.114724	0.0679909	1.411	0.7851
CG32726	1	1.53367	1.70546	0.7835	0.6628	Neither	0.252458	0.38991	1.00072	0.5924	0.7831
Bdp1	1	1.03742	1.22092	0.9872	0.6628	Neither	0.172153	0.292449	0.0651014	0.1326	0.783
wech	1	0.930805	1.23985	0.9636	0.6633	Neither	0.239185	0.195161	0.213711	0.2257	0.7824
Usp32	1	1.14885	1.13683	0.6194	0.6633	Neither	0.0934474	0.170091	0.0906443	0.8511	0.7824
bsk	1	1.11529	1.21313	0.8801	0.6634	Neither	0.168486	0.251248	0.141018	0.423	0.7821
Dop2R	1	0.813604	1.11055	0.3553	0.6635	Neither	0.128664	0.0829772	0.0808495	1.319	0.782
mrj	1	1.15083	1.13809	0.6179	0.664	Neither	0.180561	0.0629042	0.101505	0.8533	0.7813
Ssadh	1	1.03745	1.25426	0.9903	0.6648	Neither	0.15697	0.124135	0.345433	0.1149	0.78
Gyg	1	1.05808	1.08339	0.8131	0.6648	Neither	0.0935873	0.0464991	0.0788864	0.5433	0.78
toe	1	0.643471	1.23841	0.4321	0.6649	Neither	0.264685	0.109663	0.241002	1.166	0.7799
mRpL45	1	0.791257	1.23825	0.727	0.6653	Neither	0.190498	0.179291	0.267929	0.6827	0.7793
CG2938	1	1.07575	1.24881	0.9599	0.6654	Neither	0.170409	0.225736	0.270188	0.2372	0.7791
Pih1D1	1	1.08191	1.09612	0.7406	0.6671	Neither	0.0905053	0.0287742	0.118205	0.6616	0.7764
br	1	0.998076	1.14839	NA	0.6678	Neither	0.0959032	0.135295	0.165633	0.01005	0.7754
CG3368	1	0.874198	1.23775	0.8868	0.6681	Neither	0.13561	0.107692	0.333541	0.41	0.7748
stc	1	1.31919	1.20676	0.4166	0.6684	Neither	0.237406	0.187143	0.124611	1.196	0.7744
Sam-S	1	0.974335	1.07134	0.9453	0.6684	Neither	0.0798343	0.0756455	0.025166	0.2786	0.7744
CG4587	1	1.07236	1.13192	0.8793	0.6685	Neither	0.108064	0.0851522	0.156919	0.4247	0.7742
CG32683	1	1.59904	1.75121	0.7692	0.6699	Neither	0.380872	0.435718	1.04159	0.6157	0.7721
slim	1	1.13466	1.15814	0.7435	0.6703	Neither	0.139288	0.176272	0.112037	0.6569	0.7715
Vps50	1	1.14693	1.28945	0.896	0.6704	Neither	0.149303	0.38066	0.209948	0.3915	0.7713
Rlip	1	0.964095	1.29475	0.9936	0.6709	Neither	0.189329	0.196923	0.380635	0.09386	0.7705
B4	1	1.03839	1.06861	0.8763	0.6716	Neither	0.0465023	0.0569192	0.0807984	0.4304	0.7693
Dok	1	2.28064	1.5679	0.1977	0.672	Neither	0.344222	0.802005	0.237916	1.734	0.7689
ssh	1	1.1971	1.25821	0.7872	0.6723	Neither	0.0153813	0.2641	0.31543	0.5864	0.7682
Gdi	1	1.18576	1.13781	0.506	0.6723	Neither	0.0710247	0.191044	0.082041	1.036	0.7682
vap	1	1.36463	1.22912	0.4032	0.6728	Neither	0.156086	0.304408	0.128986	1.221	0.7675
e(r)	1	1.46582	1.14011	0.0556	0.6735	Neither	0.131289	0.173783	0.0520447	2.548	0.7663
mt:Cyt-b	1	1.16925	1.10133	0.3745	0.6741	Neither	0.0819575	0.103112	0.09453	1.279	0.7655
bves	1	1.10608	1.18814	0.8763	0.6755	Neither	0.152437	0.207363	0.157814	0.4303	0.7633
CG42321	1	1.15708	1.09472	0.3809	0.6756	Neither	0.0158518	0.122851	0.0880822	1.266	0.7632
CG34133	1	0.99213	1.19096	0.9993	0.6759	Neither	0.287774	0.0938351	0.0491054	0.03143	0.7627
AkhR	1	1.54819	1.23002	0.1749	0.6765	Neither	0.0952121	0.33882	0.113533	1.816	0.7618
UQCR-Q	1	0.993096	1.17482	0.9993	0.6771	Neither	0.0999313	0.224159	0.137712	0.03005	0.7608
dikar	1	1.21993	1.08032	0.1162	0.6773	Neither	0.0857222	0.0702052	0.0667389	2.082	0.7605
snoRNA:U3:9B	1	1.24572	1.34183	0.8112	0.6775	Neither	0.235335	0.331853	0.37108	0.5465	0.7603
CanB	1	1.42593	1.16374	0.1372	0.6781	Neither	0.11847	0.195476	0.132324	1.975	0.7593
CG11902	1	1.24819	1.13918	0.339	0.6782	Neither	0.0843705	0.140129	0.153861	1.354	0.7591
CG6006	1	0.897066	1.30804	0.9543	0.6783	Neither	0.303457	0.178459	0.35102	0.2536	0.7589
snoRNA:Psi28S-2876	1	2.59353	1.63727	0.1547	0.6787	Neither	0.28644	0.610043	0.777717	1.896	0.7584
CG7536	1	1.06897	1.09698	0.8156	0.6789	Neither	0.0863173	0.08743	0.0972318	0.5391	0.758
RpS26	1	1.11923	1.07804	0.4373	0.6794	Neither	0.0735436	0.0739338	0.0711143	1.157	0.7572
Mdr65	1	1.18885	1.13663	0.4996	0.6795	Neither	0.13	0.155964	0.0873462	1.046	0.7571
COX7C	1	1.16739	1.15282	0.6339	0.68	Neither	0.0989595	0.189234	0.125093	0.8283	0.7563
snoRNA:185	1	2.61117	1.98948	0.3986	0.6804	Neither	0.272347	0.823421	1.34883	1.231	0.7557
Mob4	1	0.94515	1.23496	0.9775	0.6804	Neither	0.123632	0.294501	0.207297	0.1764	0.7558
CG8569	1	2.04046	1.67811	0.4371	0.6814	Neither	0.125949	0.822807	0.720976	1.157	0.7542
CG1092	1	1.33744	1.41427	0.7702	0.6816	Neither	0.164257	0.211596	0.617483	0.614	0.7538
side-VII	1	1.09966	1.20045	0.9041	0.6816	Neither	0.262908	0.109407	0.158049	0.3748	0.7538
Reps	1	1.1404	1.12407	0.6181	0.6816	Neither	0.124552	0.136855	0.0799561	0.853	0.7538
Gga	1	1.17971	1.19354	0.7164	0.682	Neither	0.0701264	0.2198	0.213964	0.6995	0.7533
EndoA	1	0.984633	1.05967	0.9729	0.6823	Neither	0.0311735	0.0448519	0.0802642	0.1939	0.7527
RpI1	1	0.795279	1.316	0.8454	0.6825	Neither	0.268686	0.230444	0.373205	0.4875	0.7524
CG7638	1	0.856281	1.22332	0.8472	0.6825	Neither	0.236986	0.139875	0.237484	0.4842	0.7525
CG15293	1	1.14442	1.11627	0.567	0.6826	Neither	0.103174	0.109215	0.115115	0.9345	0.7523
Atf3	1	1.07338	1.11396	0.8471	0.6826	Neither	0.102691	0.121918	0.094926	0.4844	0.7523
CG9686	1	1.24257	1.28451	0.7537	0.683	Neither	0.11727	0.241713	0.377819	0.6408	0.7516
Ubi-p5E	1	0.99922	1.13088	NA	0.6832	Neither	0.146278	0.102084	0.117033	0.004477	0.7514
rho-7	1	1.53098	1.23468	0.2079	0.6833	Neither	0.179633	0.0937576	0.324623	1.699	0.7511
side-VI	1	1.29479	1.25353	0.6062	0.684	Neither	0.220964	0.340045	0.0834655	0.872	0.75
PGRP-SA	1	3.331	1.83676	0.1165	0.6861	Neither	0.376452	1.31155	0.14704	2.08	0.7467
ths	1	1.14687	1.05638	0.1439	0.6864	Neither	0.0698657	0.0563544	0.0224212	1.944	0.7463
DhpD	1	1.05177	1.16199	0.9595	0.687	Neither	0.136325	0.169998	0.152846	0.2382	0.7454
CG43092	1	1.8182	1.24633	0.0624	0.6871	Neither	0.32809	0.100276	0.214937	2.475	0.7452
CG10274	1	1.18264	1.32103	0.8797	0.6873	Neither	0.153411	0.261138	0.432346	0.4238	0.7448
TER94	1	0.961323	1.10683	0.9485	0.6873	Neither	0.0827372	0.0782008	0.133738	0.2697	0.745
Alg2	1	1.08516	1.43576	0.9846	0.6877	Neither	0.221449	0.314103	0.60535	0.1455	0.7443
Dh44	1	1.96068	1.2932	0.0663	0.688	Neither	0.363826	0.230215	0.21826	2.437	0.7439
elB	1	0.762319	1.15835	0.4595	0.688	Neither	0.146995	0.124599	0.175567	1.117	0.744
Ca-alpha1D	1	1.06062	1.13218	0.9196	0.6881	Neither	0.140516	0.131048	0.102341	0.341	0.7436
yata	1	1.14766	1.07527	0.2939	0.6883	Neither	0.0861059	0.0689045	0.0567069	1.458	0.7434
Rad23	1	1.4353	1.18763	0.2006	0.6884	Neither	0.207299	0.197667	0.116584	1.724	0.7431
CG12769	1	1.10123	1.1618	0.8583	0.6894	Neither	0.194697	0.0967201	0.155345	0.464	0.7417
CG8481	1	0.798501	1.13394	0.46	0.6894	Neither	0.148476	0.108375	0.123026	1.116	0.7416
beat-Va	1	1.5218	1.84326	0.8613	0.6898	Neither	0.541091	0.996303	0.810311	0.4586	0.7411
Hr39	1	1.1361	1.21486	0.8556	0.6902	Neither	0.150648	0.252172	0.200088	0.469	0.7404
Hlc	1	0.822246	1.12038	0.4727	0.6903	Neither	0.123214	0.115193	0.10589	1.093	0.7403
brp	1	1.05274	1.05715	0.7269	0.6904	Neither	0.032019	0.0259577	0.0851215	0.6829	0.7401
sqh	1	0.915021	1.10972	0.7953	0.6905	Neither	0.122706	0.0721062	0.112825	0.5731	0.7399
RpL10	1	1.19287	1.08324	0.204	0.691	Neither	0.0632787	0.0704532	0.100294	1.712	0.7391
Rfx	1	1.78226	1.54192	0.4879	0.6912	Neither	0.198827	0.791841	0.374825	1.066	0.7388
mt:ND3	1	1.27972	1.35453	0.7894	0.6912	Neither	0.224107	0.32278	0.437134	0.5828	0.7387
sgll	1	1.03209	1.26056	0.994	0.6914	Neither	0.32467	0.247799	0.141097	0.09095	0.7385
RpL21	1	1.15218	1.17014	0.7412	0.6914	Neither	0.123942	0.111662	0.227532	0.6606	0.7386
chic	1	1.01573	1.08422	0.9862	0.6919	Neither	0.108734	0.0514149	0.0712393	0.1379	0.7379
Oatp74D	1	1.25995	1.32605	0.7862	0.692	Neither	0.107515	0.213894	0.485642	0.588	0.7375
Grip91	1	1.26206	1.25254	0.6743	0.6921	Neither	0.374643	0.0871536	0.167182	0.7653	0.7375
snoRNA:Psi28S-3305c	1	3.27647	2.29011	0.3637	0.6922	Neither	0.528406	1.25885	1.65219	1.301	0.7372
Tsp39D	1	0.755067	1.21306	0.6219	0.6925	Neither	0.269963	0.112578	0.19959	0.8472	0.7369
CG15099	1	1.15185	1.10818	0.5067	0.6925	Neither	0.122999	0.109651	0.0719669	1.034	0.7368
Rpt6	1	1.5176	1.17461	0.0993	0.6928	Neither	0.210651	0.166907	0.110071	2.183	0.7363
Pur-alpha	1	1.39962	1.23252	0.3812	0.693	Neither	0.241029	0.1908	0.234979	1.265	0.736
Pax	1	1.09475	1.12665	0.8087	0.693	Neither	0.152935	0.118474	0.0835335	0.5507	0.7361
cnk	1	1.07017	1.14907	0.9173	0.6933	Neither	0.0677714	0.176705	0.160587	0.3463	0.7356
Dek	1	1.12659	1.18881	0.8422	0.6934	Neither	0.0749449	0.182759	0.244667	0.4931	0.7354
CG6656	1	1.01576	1.1088	0.9917	0.6935	Neither	0.0666152	0.138463	0.0961017	0.1065	0.7353
GlyP	1	1.02693	1.0278	0.7082	0.6936	Neither	0.0336284	0.0252106	0.0194526	0.7122	0.7351
CG14715	1	0.86599	1.45415	0.9663	0.6939	Neither	0.358716	0.292039	0.599414	0.2168	0.7346
CG11438	1	0.836654	1.27503	0.8732	0.6939	Neither	0.179311	0.315744	0.280083	0.4363	0.7345
HPS4	1	1.02595	1.17382	0.9912	0.6939	Neither	0.18391	0.0502203	0.218233	0.1097	0.7347
CG17883	1	1.51909	1.25336	0.2754	0.694	Neither	0.359152	0.115201	0.190353	1.505	0.7345
CG4259	1	1.67753	1.43123	0.4408	0.6954	Neither	0.258347	0.592312	0.320369	1.15	0.7323
Srp72	1	1.03785	1.57302	0.9983	0.6958	Neither	0.402853	0.15807	0.855869	0.04834	0.7318
Ggamma1	1	1.10436	1.03971	0.1486	0.6959	Neither	0.0509651	0.0348444	0.0246445	1.923	0.7316
mbc	1	1.14419	1.13473	0.6646	0.6975	Neither	0.154746	0.129828	0.102129	0.7802	0.729
CG9410	1	0.927515	1.23751	0.9647	0.6982	Neither	0.257818	0.0961372	0.289824	0.2221	0.7279
mib2	1	0.907634	1.1676	0.8912	0.6982	Neither	0.108652	0.17241	0.194893	0.4012	0.7279
Atx2	1	1.06905	1.06208	0.6462	0.6986	Neither	0.0349861	0.0818506	0.054801	0.8091	0.7274
CG42327	1	1.19531	1.12296	0.4385	0.6988	Neither	0.0430805	0.147328	0.139137	1.155	0.7269
Drp1	1	1.31353	1.18561	0.4005	0.6993	Neither	0.120951	0.252719	0.139707	1.227	0.7261
Krn	1	1.16536	1.21142	0.7984	0.6994	Neither	0.241416	0.16163	0.206816	0.5679	0.7261
CG13283	1	1.13345	1.26464	0.9082	0.6995	Neither	0.189882	0.252567	0.315609	0.366	0.7258
CCT3	1	1.26956	1.11804	0.2221	0.7003	Neither	0.098281	0.111081	0.133437	1.655	0.7247
dpr11	1	1.21681	1.19702	0.6555	0.702	Neither	0.121453	0.225991	0.214189	0.7945	0.722
HIP	1	5.99841	2.41446	0.0555	0.7025	Neither	0.588301	2.22359	0.691719	2.549	0.7213
CG8677	1	1.09633	1.12482	0.8053	0.7026	Neither	0.165912	0.120156	0.0546252	0.5565	0.721
CG4374	1	1.25934	1.53919	0.9172	0.703	Neither	0.284482	0.497138	0.715702	0.3465	0.7204
pain	1	0.85154	1.18486	0.7923	0.7035	Neither	0.254127	0.127617	0.134535	0.578	0.7197
snz	1	0.960577	1.10623	0.9497	0.7043	Neither	0.109399	0.0994248	0.104639	0.2666	0.7183
eIF2Bdelta	1	1.31701	1.33125	0.7241	0.7044	Neither	0.387771	0.267851	0.311392	0.6873	0.7182
CG14823	1	0.704015	1.25139	0.6233	0.7047	Neither	0.139617	0.0474771	0.402849	0.845	0.7177
Atu	1	0.855194	1.4091	0.9543	0.7057	Neither	0.327396	0.255407	0.563033	0.2535	0.7162
Paf-AHalpha	1	0.859636	1.27091	0.9059	0.706	Neither	0.210615	0.190684	0.366276	0.3709	0.7158
RhoGAPp190	1	1.19338	1.11174	0.3974	0.7081	Neither	0.0922819	0.136892	0.0982125	1.233	0.7124
w	1	0.946439	1.13856	0.9465	0.7083	Neither	0.165147	0.131797	0.110296	0.2752	0.712
mGluR	1	1.71044	1.25602	0.137	0.7084	Neither	0.204876	0.373896	0.110455	1.976	0.712
CG3632	1	1.44747	1.22748	0.3184	0.7085	Neither	0.264179	0.277717	0.0793481	1.4	0.7118
CG10068	1	0.790311	1.53256	0.9446	0.7086	Neither	0.256539	0.220435	0.851744	0.2802	0.7117
Pdp1	1	1.21079	1.06389	0.0768	0.7091	Neither	0.049281	0.0790429	0.0586582	2.345	0.7109
Irc	1	1.07029	1.08733	0.7966	0.71	Neither	0.12131	0.0740372	0.0503262	0.571	0.7094
CG17549	1	1.11374	1.05466	0.2867	0.71	Neither	0.0816726	0.0449288	0.0147028	1.476	0.7094
ND-13B	1	1.02116	1.14641	0.9924	0.7108	Neither	0.139456	0.168354	0.127753	0.1023	0.7082
Lap1	1	1.35824	1.16538	0.2647	0.7113	Neither	0.215767	0.168075	0.08452	1.533	0.7075
CG5742	1	1.99161	1.27824	0.0584	0.7121	Neither	0.274334	0.319207	0.236128	2.516	0.7061
Strumpellin	1	1.20704	1.24305	0.7779	0.7121	Neither	0.10328	0.273849	0.303401	0.6015	0.7061
CG3662	1	1.01756	1.05849	0.9678	0.7124	Neither	0.0464327	0.0490617	0.0757585	0.2118	0.7058
Cyp6w1	1	1.07282	1.10342	0.8402	0.7127	Neither	0.0622974	0.156918	0.0612848	0.4966	0.7052
Cyp6a17	1	1.65873	1.22507	0.1199	0.7132	Neither	0.230778	0.257776	0.182789	2.062	0.7045
CG34408	1	1.01793	1.18998	0.9968	0.7132	Neither	0.257502	0.0811459	0.190314	0.06649	0.7044
Cyp28d1	1	1.10031	1.08071	0.6051	0.7141	Neither	0.0904846	0.0773197	0.074873	0.8737	0.703
Tbc1d15-17	1	1.22172	1.19376	0.6496	0.7144	Neither	0.19287	0.141494	0.238559	0.8038	0.7025
rdx	1	1.00083	1.08772	NA	0.7144	Neither	0.105984	0.10135	0.0433443	0.006659	0.7026
foxo	1	1.26002	1.11484	0.2442	0.7148	Neither	0.0627389	0.174398	0.076171	1.589	0.7019
Tnpo	1	1.15939	1.11775	0.5582	0.7155	Neither	0.13324	0.143726	0.0626406	0.9488	0.7009
CG17508	1	1.24702	1.10335	0.2156	0.7156	Neither	0.070343	0.138318	0.0924869	1.675	0.7007
dpr6	1	1.29942	1.29972	0.7168	0.7163	Neither	0.346992	0.0973214	0.381352	0.6989	0.6996
sff	1	1.21831	1.13195	0.4369	0.7163	Neither	0.147524	0.141426	0.107583	1.158	0.6997
poe	1	1.08721	1.04138	0.2873	0.7163	Neither	0.0435281	0.0493152	0.0303279	1.475	0.6997
beta-Man	1	0.996656	1.11658	0.9997	0.7164	Neither	0.140911	0.112049	0.0962706	0.02006	0.6994
Pxn	1	0.944462	1.11243	0.9177	0.7166	Neither	0.0937137	0.137414	0.105546	0.3453	0.699
gl	1	0.818397	1.10498	0.4096	0.7166	Neither	0.159423	0.080798	0.0434714	1.209	0.699
CG10465	1	1.41957	1.20301	0.2998	0.717	Neither	0.233425	0.257926	0.0753257	1.444	0.6985
Hydr2	1	1.24209	1.21376	0.6587	0.7179	Neither	0.269586	0.254474	0.0601256	0.7895	0.6971
lncRNA:CR31451	1	1.07503	1.08973	0.7896	0.7182	Neither	0.132448	0.0154442	0.0843099	0.5825	0.6966
wash	1	0.473698	1.24727	0.2841	0.7183	Neither	0.294592	0.0862331	0.307966	1.482	0.6965
CG3999	1	1.51611	1.264	0.3358	0.7186	Neither	0.1323	0.388109	0.21824	1.361	0.6961
shg	1	1.05402	1.10483	0.9119	0.7192	Neither	0.105763	0.136443	0.0657099	0.3581	0.6951
snoRNA:Tudor-SN-a	1	1.12614	1.11432	0.6737	0.7197	Neither	0.075552	0.0784221	0.169724	0.7661	0.6943
CG17528	1	1.04488	1.15962	0.9727	0.7209	Neither	0.239535	0.100873	0.110311	0.1947	0.6924
eIF3e	1	1.04152	1.12265	0.9608	0.7211	Neither	0.0800879	0.154419	0.129871	0.2343	0.692
Sema1b	1	1.09185	1.11002	0.7924	0.7211	Neither	0.0775811	0.163752	0.0712316	0.5778	0.6921
Tsp42Ef	1	1.20808	1.20157	0.7083	0.7226	Neither	0.29202	0.16645	0.122967	0.712	0.6898
LpR1	1	1.03723	1.08436	0.9352	0.7226	Neither	0.101433	0.0999664	0.0463913	0.3044	0.6898
CG5515	1	1.61961	1.38028	0.4568	0.7236	Neither	0.193407	0.629477	0.155982	1.121	0.6882
peb	1	1.18691	1.18648	0.7226	0.7236	Neither	0.166659	0.270505	0.0959347	0.6897	0.6882
sr	1	1.45941	1.44001	0.7045	0.724	Neither	0.311152	0.657005	0.292748	0.718	0.6876
CG14478	1	1.22787	1.09667	0.2352	0.7254	Neither	0.138729	0.0960109	0.0372556	1.615	0.6853
CG12795	1	1.13893	1.22808	0.8831	0.7255	Neither	0.137845	0.296858	0.243107	0.4173	0.6852
X11Lbeta	1	1.08134	1.161	0.9174	0.7258	Neither	0.255388	0.100653	0.0869858	0.3459	0.6848
CG1657	1	1.10315	1.07967	0.597	0.7258	Neither	0.083736	0.0776092	0.0852791	0.8865	0.6847
Cyp6a13	1	1.56465	1.35449	0.4746	0.7262	Neither	0.165408	0.598116	0.13261	1.09	0.6842
AGO1	1	1.12351	1.05398	0.2532	0.7266	Neither	0.0495094	0.047075	0.0684835	1.564	0.6834
ScsbetaA	1	1.06711	1.0599	0.6744	0.727	Neither	0.0455318	0.0814212	0.0532967	0.7651	0.6829
cyc	1	1.18159	1.29019	0.878	0.7271	Neither	0.0301245	0.458199	0.245388	0.4272	0.6826
CG18304	1	0.783933	1.20066	0.6937	0.7271	Neither	0.191185	0.0979635	0.288929	0.735	0.6826
PPO2	1	0.911759	1.06928	0.6088	0.728	Neither	0.0934107	0.0348453	0.0746335	0.8678	0.6813
CG3961	1	1.08067	1.05191	0.493	0.7284	Neither	0.0429707	0.0609407	0.056279	1.058	0.6806
CG1561	1	0.973461	1.04262	0.8798	0.7285	Neither	0.0455093	0.0497673	0.0365506	0.4237	0.6805
alphaSnap	1	1.12584	1.10711	0.6533	0.7293	Neither	0.0880613	0.150346	0.0833974	0.7979	0.6791
Usp14	1	1.24359	1.29794	0.8066	0.73	Neither	0.15175	0.442215	0.26657	0.5543	0.678
Rh3	1	0.898621	1.10091	0.7281	0.7301	Neither	0.0967413	0.0800052	0.132222	0.681	0.6779
CG45263	1	0.788797	1.08807	0.232	0.7304	Neither	0.127342	0.0722704	0.0625456	1.625	0.6774
whd	1	0.966883	1.06194	0.9101	0.7308	Neither	0.0436239	0.0712882	0.074686	0.3619	0.6768
twin	1	1.05502	1.17031	0.9658	0.7309	Neither	0.222052	0.124643	0.17376	0.2186	0.6766
Glg1	1	1.08705	1.11034	0.819	0.7313	Neither	0.0830644	0.132413	0.124613	0.5333	0.676
CSN3	1	1.15782	1.29563	0.9107	0.7315	Neither	0.122603	0.365018	0.372491	0.3608	0.6758
mim	1	0.902323	1.05316	0.3937	0.732	Neither	0.0827897	0.0364738	0.0334917	1.24	0.6749
CG12581	1	0.947448	1.08859	0.8918	0.7323	Neither	0.138533	0.0569546	0.0586722	0.4001	0.6745
CG34417	1	1.06914	1.04827	0.5475	0.7323	Neither	0.0644651	0.0484029	0.0343666	0.9664	0.6746
lace	1	1.26813	1.18831	0.5526	0.7334	Neither	0.100817	0.219828	0.242998	0.9579	0.6727
CG4729	1	1.11514	1.19729	0.8956	0.7338	Neither	0.175045	0.154618	0.273298	0.3922	0.6721
CG34404	1	1.69686	1.4551	0.5101	0.7341	Neither	0.214226	0.727455	0.336784	1.029	0.6717
vlc	1	1.39051	1.14467	0.1757	0.7343	Neither	0.168354	0.166162	0.116975	1.812	0.6714
smo	1	1.2171	1.22987	0.7584	0.7347	Neither	0.102498	0.392782	0.106629	0.6335	0.6708
CG8155	1	0.916556	1.07837	0.7075	0.7351	Neither	0.101154	0.0982022	0.0254229	0.7134	0.67
dor	1	1.05149	1.17065	0.9707	0.7359	Neither	0.135085	0.174182	0.221436	0.2018	0.6689
CG1504	1	1.21819	1.44014	0.9239	0.7363	Neither	0.598218	0.362451	0.40213	0.3312	0.6681
CG6770	1	1.16467	1.09694	0.45	0.7368	Neither	0.070748	0.137157	0.0884958	1.134	0.6674
Pak3	1	0.854773	1.10626	0.581	0.7369	Neither	0.133251	0.0503521	0.133218	0.912	0.6673
Dys	1	1.1884	1.0659	0.1522	0.737	Neither	0.0570529	0.102189	0.0305943	1.907	0.6672
CG4847	1	0.916932	1.05603	0.5351	0.7381	Neither	0.058169	0.0562384	0.0639294	0.9866	0.6655
Uch	1	0.98611	1.26403	0.9991	0.7385	Neither	0.440737	0.0547034	0.19841	0.03497	0.6648
st	1	1.3488	1.25896	0.5915	0.7386	Neither	0.411966	0.193318	0.143614	0.8952	0.6646
orb2	1	1.33914	1.21295	0.4927	0.7387	Neither	0.281566	0.22584	0.154151	1.058	0.6645
Grx1	1	0.727416	1.2086	0.6087	0.7388	Neither	0.328342	0.173519	0.100137	0.868	0.6642
kirre	1	0.749322	1.44981	0.9064	0.7393	Neither	0.214066	0.183912	0.780783	0.3698	0.6636
GATAd	1	1.45894	1.25408	0.4152	0.7393	Neither	0.230859	0.0977872	0.396375	1.198	0.6635
Pex19	1	1.30654	1.19613	0.5051	0.7393	Neither	0.117044	0.294764	0.174604	1.037	0.6635
Rgk3	1	1.35276	1.25781	0.5838	0.7395	Neither	0.369901	0.154857	0.256677	0.9074	0.6632
Tif-IA	1	1.33946	1.33658	0.736	0.7396	Neither	0.348298	0.4085	0.31367	0.6687	0.663
CG9795	1	1.02329	1.12405	0.9887	0.7399	Neither	0.102928	0.163167	0.123967	0.1244	0.6625
Gbeta5	1	1.10565	1.13336	0.824	0.7401	Neither	0.0326906	0.21273	0.120352	0.5247	0.6624
CG14762	1	0.896922	1.07386	0.5736	0.7402	Neither	0.0839713	0.0803741	0.0718348	0.9239	0.662
Nplp3	1	0.917669	1.06155	0.5984	0.7408	Neither	0.0239585	0.0863174	0.0705427	0.8843	0.6611
Tg	1	0.978405	1.1967	0.9961	0.741	Neither	0.221317	0.253767	0.139698	0.07255	0.6608
CG11076	1	1.28459	1.14035	0.3454	0.741	Neither	0.186038	0.151616	0.100328	1.34	0.6608
SPE	1	1.05302	1.10821	0.9272	0.7412	Neither	0.0860418	0.131795	0.124462	0.3236	0.6605
HPS1	1	0.681791	1.14435	0.2955	0.7417	Neither	0.188448	0.0241338	0.188927	1.455	0.6598
Nup160	1	1.1922	1.38397	0.9246	0.7426	Neither	0.28374	0.461124	0.465863	0.3296	0.6584
CG5381	1	1.0919	1.1305	0.8589	0.7431	Neither	0.171239	0.0635263	0.16038	0.4631	0.6576
eIF3d1	1	0.88329	1.1192	0.752	0.7433	Neither	0.0654832	0.13058	0.167323	0.6435	0.6573
CG33298	1	1.05633	1.1185	0.9322	0.7445	Neither	0.103791	0.109188	0.162302	0.3116	0.6554
betaggt-I	1	1.27808	1.28754	0.7583	0.7446	Neither	0.235086	0.334586	0.348864	0.6336	0.6552
CG33116	1	1.02769	1.20604	0.9943	0.7451	Neither	0.136774	0.348327	0.0930089	0.08796	0.6544
mRpS29	1	0.719159	1.23319	0.6596	0.7452	Neither	0.186061	0.259779	0.297338	0.788	0.6543
pds5	1	0.924252	1.14704	0.9216	0.7459	Neither	0.223127	0.0787425	0.141624	0.3364	0.6531
CG42269	1	1.96252	1.33656	0.1623	0.7465	Neither	0.362359	0.421522	0.300704	1.865	0.6522
ken	1	1.66461	1.17153	0.0575	0.7465	Neither	0.130089	0.263535	0.131917	2.527	0.6521
Pka-C1	1	1.03701	1.05853	0.8856	0.7465	Neither	0.0253601	0.0516867	0.0936206	0.4124	0.6522
Crtc	1	1.26338	1.12052	0.3085	0.7471	Neither	0.118859	0.166007	0.0984815	1.423	0.6512
CG4716	1	1.19974	1.11916	0.4742	0.7476	Neither	0.0921264	0.124074	0.16268	1.09	0.6504
CG8229	1	1.28154	1.1486	0.3981	0.7479	Neither	0.225407	0.142499	0.0854302	1.231	0.6499
CG8814	1	1.06173	1.13091	0.9345	0.7487	Neither	0.106819	0.0692352	0.211889	0.3059	0.6486
rn	1	2.39974	1.82108	0.4657	0.7489	Neither	0.128191	1.30154	0.83361	1.105	0.6484
Pde11	1	1.03829	1.06673	0.9053	0.7489	Neither	0.089566	0.0371675	0.0804897	0.3721	0.6485
Vrp1	1	1.03901	1.07339	0.9181	0.7493	Neither	0.051649	0.123172	0.0375712	0.3444	0.6478
CG5919	1	0.722438	1.54024	0.9234	0.75	Neither	0.199778	0.142377	0.993059	0.3323	0.6468
Pgant5	1	1.17314	1.0895	0.3883	0.7501	Neither	0.0846412	0.141106	0.0408753	1.251	0.6465
CG32164	1	0.899017	1.17197	0.902	0.7507	Neither	0.2977	0.0758406	0.109887	0.3791	0.6455
CG5862	1	1.24239	1.31529	0.8406	0.751	Neither	0.182939	0.493019	0.286143	0.4959	0.645
CG7483	1	1.36363	1.1679	0.3201	0.7513	Neither	0.0673463	0.281297	0.13444	1.396	0.6447
CHKov2	1	3.1165	1.68599	0.1344	0.7514	Neither	0.158252	1.19766	0.489686	1.989	0.6445
CG15201	1	1.29222	1.1495	0.3842	0.7517	Neither	0.0451346	0.0294452	0.279133	1.259	0.644
Irk3	1	1.17452	1.30838	0.9092	0.7523	Neither	0.292735	0.401463	0.312995	0.364	0.6432
CG7016	1	1.05972	1.23357	0.9805	0.7528	Neither	0.293285	0.187282	0.277999	0.1642	0.6423
ATPsynC	1	1.10884	1.0576	0.4072	0.7528	Neither	0.0919796	0.0500488	0.0331841	1.214	0.6423
Ucp4A	1	0.943097	1.21044	0.9782	0.7529	Neither	0.340534	0.0404769	0.208457	0.1737	0.6422
Rh50	1	1.29021	1.19264	0.5472	0.7532	Neither	0.327726	0.0592882	0.155755	0.9667	0.6417
CG11236	1	1.24125	1.27982	0.8079	0.754	Neither	0.363756	0.162415	0.357393	0.5521	0.6404
Rab11	1	1.09729	1.0641	0.5441	0.754	Neither	0.0814981	0.0333421	0.0852841	0.972	0.6404
CalpB	1	1.11972	1.16577	0.8597	0.7548	Neither	0.161227	0.180692	0.205564	0.4616	0.6392
aux	1	1.04199	1.12531	0.9671	0.7548	Neither	0.15318	0.145058	0.114781	0.2141	0.639
porin	1	1.02959	1.0542	0.9164	0.7557	Neither	0.0515507	0.0692365	0.0581863	0.3481	0.6377
ICA69	1	1.36833	1.37007	0.7576	0.7558	Neither	0.182356	0.419787	0.543901	0.6346	0.6376
snoRNA:Psi28S-1060	1	1.02312	1.32883	0.9986	0.7562	Neither	0.272686	0.132381	0.554939	0.04477	0.6369
CG4250	1	1.46719	1.15685	0.1546	0.7562	Neither	0.129536	0.0868743	0.258161	1.897	0.6369
CG6454	1	1.09869	1.093	0.7318	0.7565	Neither	0.0919304	0.132021	0.078501	0.6752	0.6363
S2P	1	1.20466	1.1813	0.7045	0.7567	Neither	0.208517	0.164201	0.226743	0.7181	0.6361
CG42336	1	1.78452	1.19671	0.0567	0.7569	Neither	0.191745	0.294494	0.141691	2.536	0.6358
CG31694	1	0.912878	1.07463	0.689	0.7569	Neither	0.0670608	0.126159	0.0160844	0.7421	0.6358
CG4678	1	0.787463	1.40929	0.9247	0.7579	Neither	0.261756	0.278398	0.691865	0.3293	0.6342
nrv2	1	1.04389	1.03649	0.6759	0.758	Neither	0.0538911	0.0173659	0.0419868	0.7627	0.6341
flr	1	1.16079	1.14413	0.7114	0.7581	Neither	0.0886232	0.248283	0.0897033	0.7072	0.6339
Chc	1	1.1248	1.04796	0.2239	0.7582	Neither	0.0494112	0.0753641	0.0216572	1.649	0.6337
CG11807	1	0.836762	1.07987	0.3671	0.7586	Neither	0.0423537	0.110207	0.09967	1.294	0.6331
CG2278	1	1.02202	1.28757	0.9983	0.7595	Neither	0.391688	0.227155	0.325267	0.04838	0.6317
Spred	1	1.14697	1.15108	0.7699	0.7595	Neither	0.159525	0.208913	0.12924	0.6145	0.6317
drl	1	1.24962	1.45903	0.9187	0.7601	Neither	0.35205	0.473769	0.668103	0.3429	0.6306
CG8818	1	1.43128	1.24595	0.4655	0.7601	Neither	0.0350612	0.426143	0.212919	1.106	0.6306
CG5316	1	1.71964	1.22717	0.1325	0.7601	Neither	0.0302532	0.431936	0.0851451	1.997	0.6305
Mef2	1	0.925797	1.08582	0.8119	0.7601	Neither	0.0666988	0.0370533	0.148163	0.5453	0.6307
CG7492	1	1.04056	1.15242	0.9797	0.7611	Neither	0.221316	0.165032	0.109176	0.1673	0.6288
CG4615	1	1.19631	1.22101	0.8046	0.7617	Neither	0.208844	0.290945	0.240135	0.5576	0.6277
LpR2	1	1.1347	1.07842	0.4819	0.7622	Neither	0.137308	0.0511486	0.0446719	1.077	0.627
ben	1	1.20232	1.14273	0.5961	0.7625	Neither	0.0136503	0.133751	0.24451	0.888	0.6265
spg	1	1.22231	1.13345	0.5018	0.7629	Neither	0.170296	0.0975279	0.172316	1.043	0.6258
CG5276	1	0.718618	1.15979	0.4683	0.7633	Neither	0.132459	0.199532	0.201609	1.101	0.6251
Rint1	1	0.780401	1.38436	0.9123	0.7634	Neither	0.443981	0.105965	0.598977	0.3571	0.6251
Debcl	1	0.759876	1.18276	0.6386	0.7635	Neither	0.184534	0.232579	0.200506	0.8209	0.6248
CG7166	1	2.60321	1.4737	0.1115	0.7646	Neither	0.162476	0.851796	0.339173	2.109	0.6231
Pits	1	1.27981	1.14613	0.418	0.7646	Neither	0.0438845	0.208031	0.193159	1.193	0.623
CG13933	1	0.988968	1.15187	0.9985	0.7651	Neither	0.24241	0.167232	0.0510875	0.0452	0.6223
Tango14	1	0.763943	1.26146	0.8026	0.7656	Neither	0.302628	0.276107	0.312634	0.561	0.6214
Ank2	1	1.0612	1.0401	0.5586	0.7657	Neither	0.0428334	0.0455568	0.048356	0.9483	0.6214
CG5973	1	1.31849	1.11124	0.1852	0.7659	Neither	0.174786	0.101655	0.0852603	1.778	0.6209
wrapper	1	0.794506	1.19761	0.7509	0.7662	Neither	0.219673	0.303391	0.10871	0.6453	0.6205
jagn	1	1.2503	1.17448	0.5957	0.7669	Neither	0.24836	0.114046	0.210501	0.8887	0.6195
mon2	1	1.60633	1.21149	0.1866	0.7675	Neither	0.100207	0.390308	0.114557	1.773	0.6183
Pp1alpha-96A	1	1.06466	1.09591	0.8834	0.7678	Neither	0.12926	0.133836	0.0388532	0.4167	0.618
CG6398	1	1.12789	1.13921	0.7986	0.7679	Neither	0.129229	0.0977863	0.223381	0.5676	0.6178
CG8736	1	0.878541	1.07418	0.5204	0.768	Neither	0.056963	0.0628812	0.120173	1.011	0.6176
SelT	1	1.72832	1.28085	0.2418	0.7693	Neither	0.225618	0.442728	0.255738	1.596	0.6155
dom	1	1.11629	1.07434	0.5498	0.7694	Neither	0.0912947	0.0847116	0.0799007	0.9625	0.6153
128up	1	0.882433	1.27525	0.9511	0.7695	Neither	0.376683	0.227894	0.326312	0.2628	0.6152
CG6426	1	1.25618	1.21039	0.6847	0.7695	Neither	0.121345	0.315027	0.24802	0.749	0.6151
beat-VII	1	1.06656	1.23309	0.9777	0.77	Neither	0.398156	0.149808	0.187038	0.1754	0.6143
CG8086	1	1.10086	1.09163	0.7312	0.77	Neither	0.0426733	0.116213	0.134291	0.6763	0.6144
Stt3B	1	0.998365	1.09908	NA	0.7708	Neither	0.0984264	0.103367	0.137134	0.01012	0.6131
CG16756	1	1.6376	1.16956	0.0819	0.7709	Neither	0.144284	0.272597	0.140237	2.305	0.6129
AlaRS	1	1.16516	1.15833	0.7547	0.7709	Neither	0.0620081	0.202878	0.234774	0.6393	0.6128
VhaAC39-1	1	1.09255	1.08339	0.7286	0.7709	Neither	0.0545758	0.125244	0.0954173	0.6802	0.6129
olf186-M	1	1.34037	1.25673	0.6443	0.7712	Neither	0.240486	0.44384	0.0936568	0.8119	0.6124
Csas	1	2.46944	1.49464	0.1743	0.7714	Neither	0.388318	0.808009	0.419716	1.818	0.612
Ranbp16	1	1.41317	1.2326	0.476	0.7714	Neither	0.178554	0.360695	0.233656	1.087	0.6121
GCS2beta	1	0.960447	1.33636	0.9962	0.7717	Neither	0.265689	0.244038	0.568762	0.07192	0.6116
RpL27	1	0.949874	1.07512	0.8879	0.772	Neither	0.0851503	0.0651641	0.105693	0.4078	0.6111
Galphai	1	1.24378	1.21382	0.7188	0.7725	Neither	0.0332164	0.21279	0.371186	0.6957	0.6102
Eip55E	1	0.87668	1.12336	0.773	0.7729	Neither	0.171552	0.149617	0.0979708	0.6095	0.6097
CG4853	1	1.11044	1.12773	0.823	0.7734	Neither	0.158053	0.189758	0.070778	0.5265	0.6089
arm	1	1.07954	1.04921	0.5371	0.7736	Neither	0.0647152	0.0634793	0.0399233	0.9835	0.6085
dpr14	1	2.71071	1.55894	0.1632	0.7738	Neither	0.147792	1.1016	0.177627	1.861	0.6082
CG10417	1	1.62674	1.23188	0.2258	0.7739	Neither	0.210516	0.156558	0.386384	1.644	0.6081
eEF5	1	1.04599	1.03815	0.6952	0.7742	Neither	0.0602168	0.0315159	0.0359516	0.7326	0.6076
TotA	1	1.36162	1.21109	0.5029	0.7743	Neither	0.299288	0.2976	0.0547345	1.041	0.6075
CG31156	1	1.57473	1.38669	0.5876	0.7748	Neither	0.538694	0.490504	0.281023	0.9014	0.6065
CG7044	1	0.701972	1.49612	0.909	0.775	Neither	0.388285	0.0902249	0.91936	0.3643	0.6064
Odc1	1	1.16596	1.09091	0.4652	0.7751	Neither	0.0755013	0.123021	0.113629	1.106	0.6061
CG2736	1	1.02816	1.08411	0.9704	0.7751	Neither	0.0658829	0.112952	0.108536	0.203	0.6062
5PtaseI	1	1.20054	1.22476	0.8148	0.7753	Neither	0.306162	0.301612	0.147805	0.5404	0.6057
phyl	1	0.521369	1.29649	0.5415	0.776	Neither	0.234518	0.0596674	0.549623	0.9761	0.6047
5-HT2A	1	0.886042	1.05105	0.3409	0.7761	Neither	0.0649733	0.0611893	0.0522431	1.35	0.6046
CG33639	1	0.88752	1.26868	0.9545	0.7762	Neither	0.392046	0.182412	0.330875	0.253	0.6044
snoRNA:Psi28S-3327b	1	1.5027	1.46133	0.7434	0.777	Neither	0.474804	0.710874	0.383558	0.6571	0.603
Gie	1	1.22308	1.17026	0.6583	0.777	Neither	0.280855	0.169667	0.109179	0.7901	0.603
Lon	1	1.33786	1.1036	0.1398	0.7777	Neither	0.103294	0.179383	0.0398717	1.963	0.6019
CG3588	1	1.29511	1.13586	0.3618	0.7784	Neither	0.162533	0.17708	0.137651	1.305	0.6007
CG11141	1	1.10305	1.18749	0.9247	0.7792	Neither	0.160482	0.227014	0.263583	0.3294	0.5994
eEF1alpha2	1	1.07609	1.04396	0.5049	0.7793	Neither	0.0297413	0.0653677	0.0539631	1.037	0.5993
PlexB	1	1.26245	1.10082	0.2549	0.7795	Neither	0.140576	0.118875	0.092737	1.559	0.599
CG3967	1	1.0895	1.1999	0.9492	0.7796	Neither	0.322738	0.216132	0.127696	0.2681	0.5988
Cpsf100	1	2.02812	1.35092	0.1925	0.7802	Neither	0.290331	0.616168	0.229893	1.752	0.5979
CNBP	1	1.06713	1.05492	0.6966	0.7803	Neither	0.0768987	0.0610704	0.0549973	0.7304	0.5976
CG4768	1	1.51327	1.19099	0.2391	0.7808	Neither	0.265602	0.239071	0.16101	1.604	0.5968
Cam	1	1.10653	1.03977	0.2414	0.7812	Neither	0.0567273	0.026973	0.0522259	1.597	0.5963
CG34454	1	1.83392	1.35968	0.3267	0.7815	Neither	0.656501	0.280035	0.19337	1.381	0.5957
dtn	1	1.17487	1.06819	0.2668	0.7816	Neither	0.113729	0.0322659	0.075448	1.527	0.5955
CG44098	1	1.05432	1.26462	0.9891	0.7824	Neither	0.488515	0.149255	0.190892	0.122	0.5943
mop	1	0.97427	1.07417	0.9695	0.7824	Neither	0.023985	0.126559	0.0823259	0.2061	0.5942
mRpS5	1	1.31246	1.19857	0.5668	0.7825	Neither	0.102281	0.29546	0.264177	0.9349	0.5941
Diap1	1	1.08955	1.08791	0.7757	0.7825	Neither	0.128559	0.0738011	0.104285	0.6051	0.594
pigeon	1	0.384152	1.57683	0.7583	0.7829	Neither	0.227852	0.0807	1.16568	0.6336	0.5934
Ugt86Da	1	1.17614	1.21058	0.8407	0.7834	Neither	0.251918	0.301293	0.187391	0.4958	0.5927
mxc	1	0.75927	1.4054	0.9149	0.7839	Neither	0.36107	0.130698	0.745825	0.3515	0.5919
CG34353	1	1.81848	1.24535	0.1375	0.7841	Neither	0.241308	0.429656	0.123313	1.973	0.5915
CG7781	1	1.41222	1.14899	0.2284	0.7843	Neither	0.213513	0.18054	0.130789	1.635	0.5911
CG14408	1	0.819201	1.08437	0.3809	0.7846	Neither	0.0412586	0.0969976	0.139652	1.266	0.5906
Sdc	1	1.17056	1.05762	0.1934	0.7847	Neither	0.0556126	0.094505	0.0474713	1.748	0.5906
CG4267	1	0.902189	1.16919	0.9196	0.7851	Neither	0.313978	0.113911	0.108867	0.341	0.5899
CG15890	1	0.803904	1.36031	0.9283	0.7852	Neither	0.287186	0.141096	0.676453	0.3209	0.5897
Tim17b	1	1.88612	1.32964	0.2458	0.7853	Neither	0.275205	0.570373	0.260616	1.585	0.5895
Ppn	1	1.0139	1.03286	0.9558	0.7853	Neither	0.0198877	0.0286802	0.0586667	0.2493	0.5896
Listericin	1	1.18477	1.31811	0.9193	0.786	Neither	0.251795	0.506716	0.343874	0.3418	0.5884
Picot	1	1.17907	1.11751	0.5907	0.7861	Neither	0.155528	0.0829611	0.169623	0.8965	0.5883
Tm2	1	1.0692	1.07341	0.8064	0.7861	Neither	0.0964188	0.0702515	0.0955305	0.5546	0.5882
RpS7	1	0.94841	1.05153	0.7865	0.7869	Neither	0.0435271	0.0824761	0.0535464	0.5876	0.5868
CG17928	1	0.99885	1.11529	NA	0.7872	Neither	0.0901274	0.0908033	0.203995	0.005849	0.5864
CG13921	1	0.945105	1.26228	0.989	0.7875	Neither	0.222797	0.311687	0.392309	0.1226	0.5858
Sox14	1	0.949456	1.07989	0.9063	0.788	Neither	0.101862	0.0847758	0.102009	0.3702	0.585
18SrRNA-Psi:CR41602	1	1.1995	1.08781	0.3513	0.7886	Neither	0.123139	0.116761	0.0714943	1.327	0.584
CG3842	1	0.958497	1.11061	0.9657	0.7893	Neither	0.121846	0.0593023	0.188774	0.2187	0.583
CG30394	1	0.43495	1.28755	0.4447	0.79	Neither	0.170658	0.15413	0.559982	1.143	0.5818
CG4038	1	1.20207	1.21399	0.8096	0.7902	Neither	0.306197	0.299241	0.140645	0.5492	0.5816
CG9663	1	1.21984	1.15329	0.6303	0.7902	Neither	0.183165	0.25033	0.0896501	0.8339	0.5814
mRpS7	1	2.69458	1.64004	0.2627	0.7905	Neither	0.361505	1.26101	0.316247	1.538	0.5809
Pvr	1	0.977277	1.13477	0.993	0.7905	Neither	0.250454	0.0907738	0.0988045	0.09795	0.5809
Cyp9f3	1	0.787657	1.26096	0.8538	0.7908	Neither	0.490222	0.135025	0.211386	0.4723	0.5804
hfw	1	0.939259	1.13724	0.9532	0.7908	Neither	0.142623	0.109125	0.227189	0.2569	0.5804
Zpr1	1	0.99546	1.24849	NA	0.791	Neither	0.406305	0.252185	0.215682	0.0106	0.5801
CG5500	1	0.930164	1.24408	0.98	0.791	Neither	0.270394	0.133871	0.417567	0.166	0.5803
Pask	1	1.15043	1.11874	0.6936	0.791	Neither	0.159734	0.141684	0.13125	0.7351	0.5802
Syx6	1	1.06886	1.13408	0.9378	0.7912	Neither	0.211184	0.186652	0.028088	0.2978	0.5798
snoRNA:Psi28S-1135c	1	3.61108	1.91188	0.2206	0.7914	Neither	0.422046	1.85457	0.313051	1.659	0.5794
X11L	1	1.03935	1.10455	0.9659	0.7914	Neither	0.0624131	0.108508	0.182131	0.2181	0.5794
mRpS9	1	1.20224	1.12863	0.5825	0.792	Neither	0.126919	0.167982	0.172665	0.9097	0.5786
Atg14	1	1.39604	1.19571	0.4306	0.7924	Neither	0.298454	0.269014	0.103044	1.169	0.5779
Drl-2	1	1.55145	1.28206	0.4524	0.7925	Neither	0.370585	0.377279	0.27919	1.129	0.5777
CG6707	1	1.00676	1.09882	0.9988	0.7929	Neither	0.132271	0.126282	0.102678	0.03945	0.5771
ko	1	1.22319	1.13844	0.5698	0.793	Neither	0.0928204	0.248474	0.126648	0.93	0.5769
CycT	1	0.899525	1.08872	0.7459	0.7931	Neither	0.136769	0.119478	0.0501903	0.6531	0.5767
CG17565	1	0.733021	1.24223	0.7576	0.7936	Neither	0.17587	0.0809521	0.477478	0.6346	0.5758
Apc	1	1.01243	1.06241	0.9904	0.7939	Neither	0.0956501	0.0493994	0.0778749	0.1145	0.5753
Pld	1	1.41816	1.15505	0.2585	0.7944	Neither	0.142376	0.246723	0.167638	1.549	0.5746
Sec13	1	1.75609	1.34034	0.376	0.7947	Neither	0.147474	0.706526	0.0783741	1.276	0.5741
RpL5	1	1.03052	1.03064	0.7967	0.7953	Neither	0.0404281	0.0309884	0.0411513	0.5708	0.5731
nwk	1	1.02622	1.09318	0.9812	0.7957	Neither	0.138568	0.0562682	0.131886	0.1611	0.5723
CG32017	1	1.24383	1.11949	0.4315	0.7958	Neither	0.100936	0.205273	0.114437	1.168	0.5722
slo	1	1.03042	1.04487	0.8979	0.7961	Neither	0.0914053	0.0279888	0.0101495	0.3875	0.5717
Pp2B-14D	1	1.06515	1.12824	0.941	0.7968	Neither	0.155842	0.213929	0.0757278	0.2898	0.5705
snoRNA:Psi28S-2566	1	1.63026	1.21175	0.2097	0.7977	Neither	0.110606	0.254434	0.361506	1.694	0.5691
Obp56d	1	1.27451	1.06355	0.0641	0.7977	Neither	0.0377026	0.0878133	0.0978209	2.458	0.5691
Flo2	1	1.55448	1.15829	0.1342	0.7984	Neither	0.29391	0.171257	0.0285406	1.989	0.5679
Set	1	2.43633	1.31148	0.05	0.799	Neither	0.283444	0.403618	0.457847	2.614	0.5669
Ubr3	1	0.996268	1.05223	0.9988	0.7999	Neither	0.0785692	0.0674034	0.0456337	0.0404	0.5654
CG1620	1	0.540105	1.15932	0.231	0.8008	Neither	0.227449	0.0786652	0.248633	1.628	0.5639
crim	1	4.00444	1.77561	0.0995	0.8013	Neither	0.466579	1.57449	0.38581	2.181	0.5631
tamo	1	1.45163	1.12697	0.1314	0.8013	Neither	0.117354	0.211403	0.133459	2.003	0.5631
SdhC	1	0.737441	1.08874	0.2193	0.8019	Neither	0.135983	0.099744	0.094536	1.663	0.5622
Chmp1	1	0.649401	1.20437	0.5503	0.8028	Neither	0.35177	0.151357	0.229567	0.9617	0.5606
ssx	1	1.07303	1.10236	0.8919	0.803	Neither	0.106743	0.163056	0.109921	0.3998	0.5603
mthl1	1	1.04539	1.23626	0.9916	0.8045	Neither	0.297067	0.306983	0.294372	0.1072	0.5578
ldlCp	1	1.37848	1.26054	0.6458	0.8048	Neither	0.365532	0.317279	0.305868	0.8096	0.5573
CG7630	1	1.35826	1.09142	0.1001	0.8058	Neither	0.15556	0.100844	0.0789398	2.178	0.5557
Slik	1	1.11447	1.03974	0.2413	0.8064	Neither	0.0401947	0.0406761	0.0665539	1.598	0.5546
gig	1	1.12371	1.09794	0.716	0.8066	Neither	0.129585	0.0868032	0.150026	0.7001	0.5543
ash2	1	1.06016	1.33796	0.9929	0.8069	Neither	0.390814	0.20618	0.603023	0.09855	0.5537
kst	1	1.08664	1.05291	0.5849	0.8073	Neither	0.0545747	0.0535236	0.0887731	0.9058	0.5531
CG31445	1	0.919814	1.0381	0.4336	0.8074	Neither	0.0151189	0.0436334	0.0706364	1.164	0.553
CG11134	1	1.05805	1.23484	0.9865	0.8088	Neither	0.202346	0.158267	0.454929	0.1361	0.5505
Tpr2	1	1.47846	1.12945	0.1254	0.8091	Neither	0.127234	0.216164	0.141934	2.033	0.5501
Sec23	1	1.13123	1.09704	0.6887	0.8096	Neither	0.169322	0.0958493	0.0946713	0.7428	0.5493
stck	1	1.85194	1.18269	0.0548	0.8102	Neither	0.176284	0.309743	0.198966	2.556	0.5482
RpII140	1	1.06546	1.09641	0.9054	0.8103	Neither	0.148919	0.11045	0.109789	0.3721	0.548
RasGAP1	1	0.977156	1.08177	0.9831	0.811	Neither	0.125767	0.0199648	0.131641	0.1528	0.5468
hig	1	1.14806	1.07368	0.4695	0.811	Neither	0.0764065	0.0684729	0.129272	1.099	0.5468
mt:ND1	1	1.37126	1.10202	0.1347	0.8115	Neither	0.0676288	0.136635	0.170686	1.987	0.546
SkpA	1	0.982141	1.14537	0.9967	0.8118	Neither	0.234699	0.182562	0.134641	0.06701	0.5455
CG3760	1	1.75565	1.36175	0.4472	0.812	Neither	0.217985	0.749048	0.227544	1.139	0.5452
CG8372	1	0.630042	1.14773	0.3339	0.8121	Neither	0.125655	0.243435	0.187416	1.365	0.5451
Myo95E	1	1.3146	1.10752	0.2472	0.815	Neither	0.180253	0.15876	0.0417197	1.58	0.5401
CG8034	1	1.2404	1.10173	0.3769	0.8157	Neither	0.126424	0.177703	0.0766637	1.274	0.539
CG4022	1	1.17953	1.19108	0.8347	0.8158	Neither	0.332698	0.0992681	0.261018	0.5062	0.5388
eIF4E1	1	1.01131	1.06889	0.9943	0.816	Neither	0.129063	0.0610962	0.0645525	0.08837	0.5384
CG33978	1	1.23418	1.07731	0.23	0.8161	Neither	0.0876369	0.136699	0.0676521	1.63	0.5382
CG18135	1	0.97043	1.0274	0.7908	0.8163	Neither	0.0296078	0.0522516	0.0169048	0.5805	0.5379
InR	1	1.32253	1.11153	0.2571	0.8168	Neither	0.0441026	0.24183	0.0652478	1.553	0.5371
CG13315	1	1.09036	1.09131	0.8201	0.8168	Neither	0.158547	0.0297534	0.131718	0.5314	0.537
Wnt5	1	1.66333	1.26678	0.3479	0.817	Neither	0.345435	0.450803	0.219272	1.334	0.5367
Axn	1	0.634313	1.11739	0.2177	0.8177	Neither	0.074386	0.0954343	0.239649	1.668	0.5355
GluRIA	1	1.10097	1.23798	0.9631	0.8178	Neither	0.473921	0.151145	0.221274	0.2271	0.5354
CG33229	1	2.05328	1.24853	0.0874	0.8185	Neither	0.272477	0.411966	0.284216	2.264	0.5342
RpL12	1	0.997658	1.07576	0.9998	0.8187	Neither	0.0806715	0.0935623	0.122242	0.01651	0.5339
tun	1	1.23944	1.10784	0.4226	0.819	Neither	0.162837	0.0351754	0.183226	1.184	0.5333
Drak	1	1.07478	1.06451	0.7686	0.8199	Neither	0.0661185	0.096237	0.0918267	0.6165	0.5319
RpS20	1	0.976718	1.10175	0.9893	0.821	Neither	0.138379	0.111587	0.153951	0.1213	0.5299
Als2	1	1.247	1.09989	0.3593	0.821	Neither	0.207976	0.0748764	0.0667383	1.31	0.5298
CG9246	1	0.627329	1.14192	0.3223	0.8211	Neither	0.159499	0.16758	0.232625	1.391	0.5298
CG17202	1	0.895541	1.2707	0.9701	0.8217	Neither	0.371485	0.189437	0.468383	0.204	0.5287
Cyp4ac1	1	0.753061	1.10775	0.4085	0.8218	Neither	0.204953	0.115779	0.0833637	1.211	0.5285
bab2	1	1.07104	1.11475	0.9258	0.8221	Neither	0.205055	0.118897	0.121149	0.3269	0.5279
CG8184	1	1.10005	1.05003	0.4939	0.8221	Neither	0.0985129	0.0550833	0.0268655	1.056	0.5281
Ubc7	1	1.33658	1.14946	0.4218	0.8229	Neither	0.0548795	0.308558	0.15035	1.186	0.5266
wapl	1	1.1089	1.08499	0.7346	0.8247	Neither	0.165241	0.0890325	0.0655428	0.6708	0.5236
CG15186	1	1.04076	1.09763	0.9659	0.8252	Neither	0.153478	0.157711	0.0623595	0.2183	0.5228
ND-B22	1	0.962088	1.11701	0.9792	0.8254	Neither	0.0719324	0.105494	0.24281	0.1693	0.5224
CG17574	1	1.01642	1.10926	0.9955	0.8256	Neither	0.0549889	0.238141	0.0774525	0.07843	0.522
Aatf	1	2.61245	1.35466	0.0738	0.8259	Neither	0.241337	0.756856	0.250517	2.371	0.5215
CG11474	1	1.52082	1.19688	0.3273	0.8259	Neither	0.156459	0.273371	0.338416	1.38	0.5216
CG9896	1	1.07674	1.16557	0.9584	0.826	Neither	0.18287	0.199714	0.279137	0.2417	0.5214
CG11248	1	0.902687	1.1578	0.9281	0.8261	Neither	0.205164	0.092741	0.29469	0.3214	0.5211
Hsp70Ab	1	1.41688	1.38351	0.7998	0.8266	Neither	0.54748	0.610712	0.377145	0.5656	0.5203
Rgl	1	1.15513	1.08808	0.5784	0.8266	Neither	0.0714639	0.0698557	0.181677	0.9163	0.5203
CG8993	1	1.75661	1.18001	0.099	0.8269	Neither	0.102625	0.351069	0.214721	2.185	0.5198
WASp	1	0.964556	1.11943	0.9827	0.8269	Neither	0.166564	0.164452	0.156166	0.1543	0.5198
CG31706	1	0.865045	1.12402	0.8008	0.8278	Neither	0.141334	0.22547	0.12295	0.5639	0.5182
CG16779	1	0.817917	1.08047	0.4299	0.8284	Neither	0.131661	0.0774001	0.113884	1.171	0.5173
kuz	1	1.07325	1.10108	0.9041	0.8285	Neither	0.19462	0.0946707	0.102359	0.3747	0.5171
Cals	1	1.03055	1.05999	0.9511	0.8291	Neither	0.111699	0.059081	0.0656545	0.2628	0.516
mRpL30	1	1.27291	1.2438	0.7942	0.8305	Neither	0.375853	0.214819	0.38804	0.5749	0.5136
sra	1	1.0163	1.13179	0.9971	0.8306	Neither	0.2351	0.171971	0.118206	0.0635	0.5135
COX5A	1	0.973526	1.091	0.9838	0.8306	Neither	0.156573	0.0865727	0.123018	0.1493	0.5133
firl	1	1.06603	1.20456	0.9802	0.831	Neither	0.386381	0.214422	0.208824	0.1655	0.5126
CG13409	1	0.935696	1.14911	0.965	0.8311	Neither	0.159462	0.137009	0.287695	0.221	0.5125
GC1	1	0.767154	1.10401	0.4428	0.8312	Neither	0.224576	0.0289694	0.102711	1.147	0.5123
Apoltp	1	1.0874	1.02371	0.1565	0.8312	Neither	0.0326814	0.033651	0.0317839	1.889	0.5124
CG3793	1	2.01647	1.59494	0.6047	0.8316	Neither	0.247543	1.32654	0.455032	0.8742	0.5117
CG4723	1	1.04748	1.20532	0.9898	0.8318	Neither	0.213425	0.323363	0.302798	0.1183	0.5114
aay	1	1.02656	1.04883	0.9456	0.832	Neither	0.0657602	0.0790465	0.0559635	0.2778	0.5109
ninaD	1	1.2339	1.17943	0.7379	0.8321	Neither	0.374205	0.154968	0.145255	0.6658	0.5107
TBC1D16	1	1.09676	1.05557	0.5952	0.8321	Neither	0.052765	0.0274557	0.119243	0.8893	0.5107
Ate1	1	1.5889	1.16745	0.1804	0.8323	Neither	0.124458	0.311703	0.220925	1.795	0.5104
sxe2	1	1.50116	1.21157	0.4101	0.8326	Neither	0.214724	0.254323	0.38385	1.208	0.51
levy	1	0.993351	1.09027	0.999	0.8326	Neither	0.0931682	0.148261	0.127809	0.03756	0.51
alpha-Est1	1	0.915032	1.04065	0.4891	0.833	Neither	0.0639348	0.0653174	0.0347104	1.064	0.5093
ome	1	1.48483	1.10931	0.0886	0.8335	Neither	0.185756	0.123502	0.140011	2.255	0.5083
Gyf	1	1.01001	1.07307	0.9965	0.8339	Neither	0.134172	0.10128	0.0531411	0.06953	0.5076
CG2225	1	1.13401	1.11982	0.7986	0.834	Neither	0.113266	0.237323	0.120239	0.5676	0.5075
ctrip	1	0.965314	1.05719	0.9341	0.8347	Neither	0.0645358	0.106777	0.0598212	0.307	0.5062
CG9586	1	1.1681	1.21067	0.89	0.8349	Neither	0.390135	0.170059	0.281032	0.4037	0.5059
CG3008	1	1.45653	1.11892	0.1455	0.8356	Neither	0.133756	0.115596	0.228171	1.937	0.5046
fax	1	1.11899	1.07173	0.6284	0.8357	Neither	0.0934133	0.141673	0.0390576	0.8369	0.5045
CG1907	1	1.01757	1.06599	0.9869	0.8357	Neither	0.111046	0.0901427	0.0721945	0.1343	0.5045
DIP-epsilon	1	0.961763	1.18831	0.9924	0.8361	Neither	0.426489	0.0812164	0.145084	0.1023	0.5038
CG5098	1	1.10126	1.11923	0.8776	0.8361	Neither	0.226483	0.139407	0.11518	0.4279	0.5039
CG12121	1	0.952374	1.12084	0.9717	0.8365	Neither	0.111663	0.168857	0.213492	0.1983	0.503
CG9220	1	0.654248	1.14763	0.4262	0.8367	Neither	0.199103	0.129677	0.269945	1.178	0.5028
CG9519	1	0.994864	1.17674	0.9999	0.8373	Neither	0.414144	0.0531109	0.108999	0.01458	0.5016
ine	1	0.96933	1.08674	0.9773	0.8374	Neither	0.173491	0.0480219	0.111589	0.1774	0.5016
mAChR-B	1	1.04802	1.17273	0.9858	0.8375	Neither	0.178064	0.223904	0.310175	0.1394	0.5013
CG9330	1	1.05137	1.10494	0.9573	0.8381	Neither	0.0813265	0.151259	0.191139	0.2448	0.5002
Nrt	1	1.05233	1.18184	0.985	0.8386	Neither	0.325287	0.0402611	0.302343	0.1437	0.4994
CG11873	1	1.01996	1.0446	0.9643	0.8389	Neither	0.0777324	0.0387884	0.0666016	0.2233	0.499
zld	1	0.944934	1.17804	0.9827	0.839	Neither	0.192813	0.347293	0.182832	0.1542	0.4987
CG4822	1	1.08408	1.0539	0.6664	0.8392	Neither	0.0754339	0.0162647	0.107651	0.7775	0.4984
NLaz	1	1.15397	1.13895	0.808	0.8394	Neither	0.206096	0.237697	0.13337	0.5519	0.498
mt:ND4	1	1.06657	1.1276	0.9523	0.8398	Neither	0.119373	0.187148	0.222499	0.2594	0.4973
Arp3	1	1.48404	1.18369	0.3611	0.8407	Neither	0.243308	0.321255	0.208651	1.306	0.4957
fs(1)K10	1	1.79938	1.25694	0.2613	0.8408	Neither	0.404702	0.476383	0.111529	1.542	0.4956
lwr	1	1.47327	1.25459	0.5752	0.8408	Neither	0.106143	0.362718	0.502982	0.9213	0.4956
Brms1	1	2.13865	1.29737	0.1547	0.841	Neither	0.139774	0.64952	0.315279	1.896	0.4952
CG8312	1	0.980925	1.08141	0.9902	0.841	Neither	0.14175	0.123525	0.0720876	0.116	0.4952
Snap25	1	1.0327	1.0896	0.9764	0.8411	Neither	0.163726	0.0964569	0.114134	0.1807	0.4951
Cpr49Ae	1	0.962953	1.13415	0.9864	0.8412	Neither	0.282754	0.112959	0.132527	0.1366	0.4948
CCT7	1	0.7315	1.11129	0.4187	0.8417	Neither	0.12817	0.126322	0.209215	1.192	0.4939
fs(1)h	1	1.04339	1.07106	0.9365	0.8421	Neither	0.0992913	0.0949391	0.110768	0.3011	0.4932
CG3308	1	0.850722	1.02092	0.012	0.8423	Neither	0.0239972	0.0266747	0.0376236	3.517	0.4928
Drep1	1	2.67139	1.37096	0.0942	0.8429	Neither	0.274284	0.843353	0.258258	2.216	0.4919
mgr	1	0.926431	1.14526	0.956	0.8433	Neither	0.208439	0.132068	0.265092	0.2488	0.4912
tgo	1	1.0963	1.10498	0.8657	0.8434	Neither	0.228078	0.0912164	0.0907863	0.4504	0.491
Arl6IP1	1	0.939455	1.18052	0.9804	0.8437	Neither	0.389974	0.117222	0.193645	0.1644	0.4903
CG8272	1	0.880206	1.17052	0.9181	0.8439	Neither	0.401506	0.128275	0.0623713	0.3443	0.4901
eya	1	0.939851	1.11361	0.9523	0.844	Neither	0.253035	0.0621389	0.113103	0.2594	0.4899
out	1	0.863048	1.08384	0.6523	0.8442	Neither	0.110959	0.157634	0.0828069	0.7995	0.4894
CG14234	1	1.32368	1.22784	0.7193	0.8444	Neither	0.309497	0.348587	0.328842	0.6949	0.4891
path	1	0.982778	1.03302	0.9538	0.8444	Neither	0.0373993	0.0347558	0.0650175	0.2551	0.4893
rush	1	0.887712	1.07551	0.6991	0.8447	Neither	0.0571636	0.144624	0.107915	0.7265	0.4886
CG9253	1	1.22004	1.2052	0.8259	0.846	Neither	0.16173	0.204114	0.446321	0.5215	0.4863
CG30389	1	1.31695	1.09617	0.2402	0.8463	Neither	0.209716	0.114225	0.042085	1.601	0.4857
[truncated: 3,763 more rows]
